# Supplementary material for: A pilot randomised controlled trial of a structured, home-based exercise programme on cardiovascular structure and function in kidney transplant recipients: the ECSERT study design and methods
Source: PubMed Central journal article supplement — BMJ Open. 2021 Oct 5;11(10):e046945. doi: 10.1136/bmjopen-2020-046945 (PMC8493915; doi:10.1136/bmjopen-2020-046945), 2021-10-05
Supplement: bmjopen-2020-046945.draft_revisions.pdf [file bmjopen-2020-046945.draft_revisions.pdf]

# BMJ Open

BMJ Open is committed to open peer review. As part of this commitment we make the peer review history of every article we publish publicly available.

When an article is published we post the peer reviewers' comments and the authors' responses online. We also post the versions of the paper that were used during peer review. These are the versions that the peer review comments apply to.

The versions of the paper that follow are the versions that were submitted during the peer review process. They are not the versions of record or the final published versions. They should not be cited or distributed as the published version of this manuscript.

BMJ Open is an open access journal and the full, final, typeset and author-corrected version of record of the manuscript is available on our site with no access controls, subscription charges or pay-per-view fees (<http://bmjopen.bmj.com>).

If you have any questions on BMJ Open's open peer review process please email [info.bmjopen@bmj.com](mailto:info.bmjopen@bmj.com)

# BMJ Open

## A pilot randomised controlled trial of a structured, home-based exercise program on cardiovascular structure and function in kidney transplant recipients: The ECSERT study design and methods

|                               |                                                                                                                                                                                                                                                                                                                                                                                                                                                                                                                                                                                                                                                                                                                                                                                                                                                                                                                                                                                                                                                                                                                                                                                                                                                                                                                                                                                                                                                                                                                                                                                                                                                                                                                                                                                                                                                                                                                                                                                                           |
|-------------------------------|-----------------------------------------------------------------------------------------------------------------------------------------------------------------------------------------------------------------------------------------------------------------------------------------------------------------------------------------------------------------------------------------------------------------------------------------------------------------------------------------------------------------------------------------------------------------------------------------------------------------------------------------------------------------------------------------------------------------------------------------------------------------------------------------------------------------------------------------------------------------------------------------------------------------------------------------------------------------------------------------------------------------------------------------------------------------------------------------------------------------------------------------------------------------------------------------------------------------------------------------------------------------------------------------------------------------------------------------------------------------------------------------------------------------------------------------------------------------------------------------------------------------------------------------------------------------------------------------------------------------------------------------------------------------------------------------------------------------------------------------------------------------------------------------------------------------------------------------------------------------------------------------------------------------------------------------------------------------------------------------------------------|
| Journal:                      | <i>BMJ Open</i>                                                                                                                                                                                                                                                                                                                                                                                                                                                                                                                                                                                                                                                                                                                                                                                                                                                                                                                                                                                                                                                                                                                                                                                                                                                                                                                                                                                                                                                                                                                                                                                                                                                                                                                                                                                                                                                                                                                                                                                           |
| Manuscript ID                 | bmjopen-2020-046945                                                                                                                                                                                                                                                                                                                                                                                                                                                                                                                                                                                                                                                                                                                                                                                                                                                                                                                                                                                                                                                                                                                                                                                                                                                                                                                                                                                                                                                                                                                                                                                                                                                                                                                                                                                                                                                                                                                                                                                       |
| Article Type:                 | Protocol                                                                                                                                                                                                                                                                                                                                                                                                                                                                                                                                                                                                                                                                                                                                                                                                                                                                                                                                                                                                                                                                                                                                                                                                                                                                                                                                                                                                                                                                                                                                                                                                                                                                                                                                                                                                                                                                                                                                                                                                  |
| Date Submitted by the Author: | 13-Nov-2020                                                                                                                                                                                                                                                                                                                                                                                                                                                                                                                                                                                                                                                                                                                                                                                                                                                                                                                                                                                                                                                                                                                                                                                                                                                                                                                                                                                                                                                                                                                                                                                                                                                                                                                                                                                                                                                                                                                                                                                               |
| Complete List of Authors:     | <p>Billany, Roseanne; University of Leicester, Department of Cardiovascular Sciences; University Hospitals of Leicester NHS Trust, John Walls Renal Unit</p> <p>Vadaszy, Noemi; University of Leicester, Department of Health Sciences Bishop , Nicolette ; Loughborough University, School of Sport, Exercise and Health Sciences</p> <p>Wilkinson, Thomas ; University of Leicester, Department of Health Sciences</p> <p>Adenwalla, Sherna; University of Leicester, Department of Cardiovascular Sciences; University Hospitals of Leicester NHS Trust, John Walls Renal Unit</p> <p>Robinson, Katherine; University of Leicester, Department of Cardiovascular Sciences</p> <p>Croker , Kathryn; University Hospitals of Leicester NHS Trust, John Walls Renal Unit</p> <p>Brady, Emer; University of Leicester, Department of Cardiovascular Sciences</p> <p>Wormleighton, Joanne; University Hospitals of Leicester NHS Trust, Department of Radiology</p> <p>Parke, Kelly; University of Leicester, Department of Cardiovascular Sciences; University Hospitals of Leicester NHS Trust, Department of Radiology</p> <p>Cooper, Nicola; University of Leicester, Department of Health Sciences</p> <p>Webster, Angela; The University of Sydney, School of Public Health; Westmead Hospital, Centre for Renal and Transplant Research</p> <p>Barratt, Jonathan; University of Leicester, Department of Cardiovascular Sciences; University Hospitals of Leicester NHS Trust, John Walls Renal Unit</p> <p>McCann, Gerry; University of Leicester, Department of Cardiovascular Sciences</p> <p>Burton, James; University of Leicester, Department of Cardiovascular Sciences; University Hospitals of Leicester NHS Trust, John Walls Renal Unit</p> <p>Smith, Alice; University of Leicester, Department of Health Sciences</p> <p>Graham-Brown, Matthew ; University of Leicester, Department of Cardiovascular Sciences; University Hospitals of Leicester NHS Trust, John Walls Renal Unit</p> |

1  
2  
3  
4  
5  
6  
7  
8  
9  
10  
11  
12  
13  
14  
15  
16  
17  
18  
19  
20  
21  
22  
23  
24  
25  
26  
27  
28  
29  
30  
31  
32  
33  
34  
35  
36  
37  
38  
39  
40  
41  
42  
43  
44  
45  
46  
47  
48  
49  
50  
51  
52  
53  
54  
55  
56  
57  
58  
59  
60

|           |                                                               |
|-----------|---------------------------------------------------------------|
| Keywords: | Renal transplantation < NEPHROLOGY, CARDIOLOGY, PUBLIC HEALTH |
|           |                                                               |

SCHOLARONE™  
Manuscripts

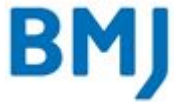

I, the Submitting Author has the right to grant and does grant on behalf of all authors of the Work (as defined in the below author licence), an exclusive licence and/or a non-exclusive licence for contributions from authors who are: i) UK Crown employees; ii) where BMJ has agreed a CC-BY licence shall apply, and/or iii) in accordance with the terms applicable for US Federal Government officers or employees acting as part of their official duties; on a worldwide, perpetual, irrevocable, royalty-free basis to BMJ Publishing Group Ltd ("BMJ") its licensees and where the relevant Journal is co-owned by BMJ to the co-owners of the Journal, to publish the Work in this journal and any other BMJ products and to exploit all rights, as set out in our [licence](#).

The Submitting Author accepts and understands that any supply made under these terms is made by BMJ to the Submitting Author unless you are acting as an employee on behalf of your employer or a postgraduate student of an affiliated institution which is paying any applicable article publishing charge ("APC") for Open Access articles. Where the Submitting Author wishes to make the Work available on an Open Access basis (and intends to pay the relevant APC), the terms of reuse of such Open Access shall be governed by a Creative Commons licence – details of these licences and which [Creative Commons](#) licence will apply to this Work are set out in our licence referred to above.

Other than as permitted in any relevant BMJ Author's Self Archiving Policies, I confirm this Work has not been accepted for publication elsewhere, is not being considered for publication elsewhere and does not duplicate material already published. I confirm all authors consent to publication of this Work and authorise the granting of this licence.

1  
2  
3 1 **A pilot randomised controlled trial of a structured, home-based exercise program on**  
4 **cardiovascular structure and function in kidney transplant recipients: The ECSERT study**  
5 **design and methods**  
6  
7  
8  
9

10 Roseanne E Billany<sup>1,2</sup>, Noemi Vadaszy<sup>3</sup>, Nicolette C Bishop<sup>4</sup>, Thomas J Wilkinson<sup>3</sup>, Sherna Adenwalla<sup>1,2</sup>,  
11 Katherine A Robinson<sup>1</sup>, Kathryn Croker<sup>2</sup>, Emer M Brady<sup>1</sup>, Joanne Wormleighton<sup>5</sup>, Kelly Parke<sup>1,5</sup>, Nicola  
12 J Cooper<sup>3</sup>, Angela C Webster<sup>6</sup>, Jonathan Barratt<sup>1,2</sup>, Gerry P McCann<sup>1</sup>, James O Burton<sup>1,2,5</sup>, Alice C Smith<sup>3</sup>,  
13 Matthew PM Graham-Brown<sup>1,2</sup>  
14  
15  
16

17  
18  
19 <sup>1</sup> Department of Cardiovascular Sciences, University of Leicester, Leicester, UK

20 <sup>2</sup> John Walls Renal Unit, University Hospitals of Leicester NHS Trust, Leicester, UK

21 <sup>3</sup> Department of Health Sciences, University of Leicester, Leicester, UK

22 <sup>4</sup> School of Sport, Exercise and Health Sciences, Loughborough University, Loughborough, UK

23 <sup>5</sup> Department of Radiology, University Hospitals of Leicester NHS Trust, Leicester, UK

24 <sup>6</sup> Sydney School of Public Health, University of Sydney, Sydney, NSW, Australia; Centre for Renal and  
25 Transplant Research, Westmead Hospital, Sydney, NSW, Australia.  
26  
27  
28  
29  
30  
31  
32  
33

34 **Corresponding author:**

35 Dr Matthew Graham-Brown

36 Department of Cardiovascular Sciences

37 University of Leicester

38 Leicester

39 United Kingdom

40 mgb23@leicester.ac.uk  
41  
42  
43  
44  
45  
46

47 **Keywords:** kidney transplantation, home-based exercise, cardiovascular disease, feasibility, cardiac  
48 MRI  
49  
50  
51

52 **Abstract:** 300

53 **Word count:** 4402  
54  
55  
56  
57  
58  
59  
60

1  
2  
3 35 **ABSTRACT**  
4  
5 36

6 37 **Background:** Cardiovascular disease (CVD) is a major cause of morbidity and mortality in kidney  
7  
8 38 transplant recipients (KTRs). CVD risk scores underestimate risk in this population as CVD is driven by  
9  
10 39 clustering of traditional and non-traditional risk factors, which lead to prognostic pathological changes  
11  
12 40 in cardiovascular structure and function. Whilst exercise may mitigate CVD in this population,  
13  
14 41 evidence is limited, and physical activity levels and patient activation towards exercise and self-  
15  
16 42 management are low. This pilot study will assess the feasibility of delivering a structured, home-based  
17  
18 43 exercise intervention in a population of KTRs at increased cardiometabolic risk and evaluate the  
19  
20 44 putative effects on cardiovascular structural and functional changes, cardiorespiratory fitness, quality  
21  
22 45 of life, patient activation, healthcare utilisation, and engagement with the prescribed exercise  
23  
24 46 program.  
25

26 47  
27 48 **Methods and analysis:** Fifty KTRs will be randomised 1:1 to: (1) the intervention; a 12-week home-  
28  
29 49 based combined resistance and aerobic exercise intervention or; (2) the control; usual care.  
30  
31 50 Intervention participants will have one introductory session for instruction and practice of the  
32  
33 51 recommended exercises prior to receiving an exercise diary, dumbbells, resistance bands, and access  
34  
35 52 to instructional videos. Outcomes, to be assessed prior to randomisation and post-intervention,  
36  
37 53 include: cardiac structure and function with stress-perfusion cardiac magnetic resonance imaging,  
38  
39 54 cardiorespiratory fitness, physical function, blood biomarkers of cardiometabolic health, quality of life,  
40  
41 55 and patient activation. The study will also evaluate the feasibility of recruitment, randomisation,  
42  
43 56 retention, assessment procedures, and the intervention implementation. These data will be used to  
44  
45 57 inform the power calculations for future definitive trials.  
46  
47 58

48 59 **Ethics and dissemination:** The protocol was reviewed and given favourable opinion by the East  
49  
50 60 Midlands-Nottingham 2 research ethics committee (ref 19/EM/0209; 14/10/2019). Results will be  
51  
52 61 published in peer-reviewed academic journals and will be disseminated to the patient and public  
53  
54 62 community via social media, newsletter articles, and presentations at conferences.  
55  
56 63

57 64 **Trial registration number:** NCT04123951; prospectively registered.  
58  
59 65  
60 66

1  
2  
3 67 **ARTICLE SUMMARY**

4  
5 68 **Strengths and limitations of this study:**

6 69

- 7  
8 70 • Data on the effects of exercise interventions on the cardiac structural and functional aspects  
9 71 of CVD in this population are lacking and baseline values of multiparametric cardiac magnetic  
10 72 resonance imaging in KTRs are previously undefined.  
11  
12  
13 73 • This study uses a novel home-based exercise intervention with the potential to translate into  
14 74 a widespread, low-resource intervention compared to in-centre, supervised interventions  
15 75 that are costly and labour intensive.  
16  
17  
18 76 • As it can be difficult to ensure control groups are not influenced to change their lifestyle as a  
19 77 result of being part of the study; control participants will be offered the intervention after  
20 78 completion of the study.  
21  
22  
23 79 • This study will provide quantitative and qualitative feasibility and pilot data to inform a  
24 80 definitive randomised controlled trial that will explore longer-term engendered lifestyle  
25 81 change in this population in response to a complex, home-based, lifestyle intervention.  
26  
27  
28 82 • Secondary outcome analysis will identify the putative cardiometabolic and muscular effects  
29 83 of the intervention, although these results would need confirming in adequately powered  
30 84 studies due to the small sample size of this pilot study.  
31  
32  
33  
34 85

## 86 BACKGROUND

87 Kidney transplantation is the preferred modality of renal replacement therapy for patients with end  
88 stage kidney disease (ESKD). Although kidney transplantation confers a significant survival advantage  
89 over remaining on dialysis, cardiovascular disease (CVD) is a leading cause of morbidity, mortality, and  
90 graft loss.<sup>1-3</sup> Since 2015, mortality rates attributed to CVD have been rising.<sup>3</sup> Cardiovascular disease in  
91 kidney transplant recipients (KTRs) associates with traditional cardiometabolic risk factors,<sup>2,4,5</sup> which  
92 drive classical atheromatous coronary artery disease, and non-traditional risk factors which drive  
93 pathological changes in cardiovascular structure and function that associate with mortality.<sup>6</sup>  
94 Immunosuppressive agents are well known to drive traditional CVD risk factors,<sup>2</sup> but also drive non-  
95 traditional cardiometabolic risk factors.<sup>7,8</sup> Non-traditional cardiometabolic risk factors, including  
96 endothelial dysfunction, systemic inflammation, acute rejection, anaemia, and deranged bone-  
97 mineral metabolism,<sup>9-11</sup> are of at least equal importance in the pathogenesis of CVD in KTRs.<sup>6</sup> This is  
98 further illustrated by the fact that traditional CVD risk-stratification tools dramatically underestimate  
99 cardiovascular risk in patients with chronic kidney disease (CKD);<sup>10</sup> coronary revascularisation does  
100 not improve outcomes for KTRs as it does in the general population<sup>11</sup> and cardiac events are more  
101 likely to be fatal in KTRs.<sup>12</sup>

102 Chronic kidney disease-related cardiomyopathy, which has been termed “Uremic Cardiomyopathy”,  
103 is characterised by stereotypical changes in the cardiovascular structure and function of the heart such  
104 as left ventricular hypertrophy (LVH), left ventricular dilatation, left ventricular systolic dysfunction,<sup>13</sup>  
105 myocardial fibrosis,<sup>14</sup> and aortic stiffness<sup>15</sup>; all of which relate to poor cardiovascular outcomes.<sup>16,17</sup>  
106 Although structural and functional improvements of the heart and vessels have been seen post-  
107 transplantation in some studies,<sup>18</sup> others have shown no regression<sup>19</sup> and parameters such as LVH are  
108 independent factors for cardiac failure and mortality in KTRs.<sup>20</sup> Cardiac magnetic resonance imaging  
109 (CMR) is the gold-standard for assessment of ventricular structure and function and we have shown  
110 methods for assessment of tissue characterisation, aortopathy, and sub-clinical systolic and diastolic  
111 function to be reproducible in patients with kidney disease,<sup>21-23</sup> making CMR the ideal imaging  
112 modality for assessing multiple aspects of prognostically relevant measures of CVD in clinical studies.  
113 Numerous epidemiological studies have observed the association between low levels of physical  
114 activity and increased prevalence of CVD risk factors,<sup>24-26</sup> and an inverse relationship between physical  
115 activity and all-cause and CVD mortality.<sup>27,28</sup> Physical activity levels in KTRs are lower than the general  
116 population,<sup>29,30</sup> with only 27% classified as meeting national recommended physical activity levels.<sup>31</sup>  
117 Whilst physical activity levels improve in the year following transplantation, they plateau after one-  
118 year.<sup>30</sup> In the general population, lifestyle changes that increase physical activity through structured  
119 exercise lower mortality.<sup>32,33</sup> Despite this evidence, there is a lack of rigorous research into the role of



1  
2  
3 120 increased physical activity in mitigating cardiovascular risk in KTRs.<sup>34</sup> Recent consensus  
4 121 recommendations from experts and stakeholders highlighted the need for a priority research agenda  
5 122 in exercise for solid organ transplant recipients (SOTRs) to improve cardiovascular outcomes in this  
6 123 patient population.<sup>35</sup> Whilst supervised exercise interventions in KTRs improve cardiorespiratory  
7 124 fitness and a variety of traditional and non-traditional risk factors for CVD, including metabolic  
8 125 profile,<sup>36-38</sup> vascular stiffening,<sup>37</sup> weight,<sup>39</sup> and inflammation,<sup>40</sup> they are not realistically deliverable in  
9 126 the current financial climate and have not translated to clinical practice. Furthermore, exercise habits  
10 127 following in-centre supervised programs are not maintained<sup>41-43</sup> which can be potentially attributed  
11 128 to low levels of patient activation (a measure of a person's skills, confidence, and knowledge to  
12 129 manage their own health) and a failure for such programs to engender sustained lifestyle changes.<sup>44</sup>  
13 130 <sup>45</sup> Home-based exercise training programs have been shown to be deliverable in patients on dialysis  
14 131 and patients undergoing cardiac rehabilitation,<sup>46 47</sup> but the effectiveness and deliverability of home-  
15 132 based exercise interventions are untested in KTRs. It cannot be assumed that such programs will be  
16 133 acceptable to KTRs, whose home-lives, social and occupational circumstances are significantly  
17 134 different to dialysis and cardiac patients. Many KTRs have had enforced sedentary lifestyles prior to  
18 135 transplantation as dialysis patients and their goals for rehabilitation as well as the disease processes  
19 136 at work may be different.

### 137 **Objectives**

138 The aims of this study are to evaluate the impact of a 12-week, home-based exercise intervention in  
139 KTRs with increased cardiometabolic risk, specifically addressing:

- 140 1. The deliverability and feasibility of the home-based exercise intervention in KTRs, defining  
141 recruitment, retention, and compliance;
- 142 2. Potential cardiovascular structural and functional parameters measured using stress-  
143 perfusion CMR;
- 144 3. Cardiorespiratory fitness and strength;
- 145 4. Biochemical markers of cardiometabolic health, body composition, physical function, and  
146 quality of life;
- 147 5. Patient activation and continued adherence to the prescribed home-based exercise program.

148 Two sub-studies will assess:

- 149 1. The acceptability of the intervention through qualitative semi-structured interviews post-  
150 intervention.
- 151 2. The differences between cardiorespiratory fitness in 'healthy controls' versus KTRs.

152

## 153 **METHODS AND ANALYSIS**

### 154 **ECSERT trial design**

155 This study is a prospective, randomised, open-label, blinded endpoint (PROBE) pilot study. The study  
156 flowchart is presented in Figure 1.

### 157 **Participant identification and recruitment**

158 Fifty KTRs with a stable kidney transplant of >1 year will be recruited from University Hospitals of  
159 Leicester NHS Trust (UHL) kidney transplant outpatient clinic lists. There are approximately 400-420  
160 KTRs registered in UHL kidney transplant outpatient clinics. Full lists of inclusion and exclusion criteria  
161 are included in Table 1. Patients will be screened by a clinician for eligibility to enter the study. Eligible  
162 patients will be approached (via telephone, post, or during their routine clinical appointment) and will  
163 be provided with verbal and written study information and time to consider without further contact  
164 (at least 24 h). Additionally, eligible patients who have given prior consent to be contacted regarding  
165 research opportunities will be contacted via post. All patients will be given the opportunity to discuss  
166 the study in more detail and to consider their participation. Consent will be performed by the Chief  
167 Investigator (MBG) according to the rules of good clinical practice.

### 168 **Randomisation**

169 Following baseline assessment, participants will be randomly allocated (1:1) to either; (1) a 12-week  
170 home-based combined resistance and aerobic exercise intervention (n=25) or; (2) control (n=25;  
171 receiving usual care). Randomisation will be blocked (using computer-generated random permuted  
172 blocks with allocation concealment; <https://www.sealedenvelope.com/simple-randomiser/v1/>) to  
173 ensure periodic balancing. The Clinical Trials Facilitator will perform the randomisation. Given the  
174 nature of the intervention, it is not possible for the participants to be blinded to their allocation.

### 175 **Intervention and comparator arms**

176 Intervention Group: 12-week home-based combined aerobic and resistance training

177 The 12-week, home-based, structured exercise program includes aerobic and resistance training (4-5  
178 sessions in total per week). Participants will be advised to complete a warm-up and cool-down prior  
179 to and following each session, respectively. Participants will continue to receive usual clinical care.

#### 180 *Aerobic component*

181 The aerobic component of the intervention will be walking, jogging, cycling, or similar, depending on  
182 resources available and participant preference. Participants will be asked to complete 2-3 sessions per  
183 week using a rating of perceived exertion (RPE)<sup>48</sup> of 13-15 (somewhat hard) for 20-30 min. RPE will

184 be collected throughout cardiopulmonary exercise tests (CPET) and participants will be educated on  
185 its use during the instructional session(s).

### 186 *Resistance component*

187 The resistance component of the exercise intervention will include a combination of 6-8 exercises per  
188 session chosen by the participant from a pool of twelve exercises (to provide variety) targeting upper  
189 and lower body and core muscle groups, using free weights and/or resistance bands. The chosen pool  
190 of exercises include: squat, hip abduction, lunge, calf-raise, side-lunge, bicep-curl, bent-over row,  
191 reverse-fly, lateral-raise, chest-press, side-bends, and standing trunk rotation. Each exercise has  
192 modifications for different abilities and may be pragmatically adjusted or changed throughout the  
193 study as required. These exercises were chosen based on their ability to be modified, their subjective  
194 difficulty, and their safety when being performed by participants new to exercise in an unsupervised  
195 environment. Participants will aim to complete 6-8 resistance exercises twice a week (but not on  
196 consecutive days to allow appropriate recovery). Initially they will be advised to complete 1-2 sets of  
197 10 repetitions (at 60% 1 repetition maximum (RM)), gradually increasing to 3-6 sets of 10 repetitions  
198 over the study period with a minimum of 30 sec rest between sets. These figures may be adjusted to  
199 accommodate different abilities and different rates of progression.

200 Participants will be provided with an exercise diary which includes additional instructions, dumbbells  
201 and resistance bands, and access to educational and instructional videos. Instructional videos will  
202 include: the importance of an active and healthy lifestyle, the importance of warming up and cooling  
203 down and how to do it, a reminder of how to use the RPE scale, demonstrations of each resistance  
204 exercise, and information about the aerobic component (videos can be viewed here:  
205 [https://www.youtube.com/playlist?list=PLwbE3AF9Ej\\_VuI5uoiF-C9Cl8wrgKz5Nv](https://www.youtube.com/playlist?list=PLwbE3AF9Ej_VuI5uoiF-C9Cl8wrgKz5Nv)). Participants will  
206 receive a telephone call from a member of the research team every two weeks in order to discuss  
207 progression of the exercise and address any issues that may arise.

### 208 Control group: 'Usual care'

209 Participants in the control group will be asked to maintain their current lifestyle and exercise habits  
210 throughout the study. This includes continuing to attend any scheduled clinic appointments and taking  
211 prescribed medication as normal. As part of routine care, KTRs are recommended to take regular  
212 exercise and maintain a healthy lifestyle. This advice will be reiterated to patients in the control group  
213 to ensure the intervention is being appropriately compared to best-practice standard care.  
214 Participants will be asked to complete a 'control diary' to note any exercise, medication changes,  
215 illness, and other relevant information. Once control participants complete the post-intervention

1  
2  
3 216 assessments, they will be offered the opportunity to complete the same intervention as the exercise  
4  
5 217 group.

## 6 7 218 **Study timeline**

### 8 9 219 *Baseline assessments*

10  
11 220 The ECSERT study timeline is shown in Figure 1. Baseline assessments will be carried out on the same  
12  
13 221 day and in conjunction with routine clinical appointments to prevent additional travel.

### 14 15 222 *Collection of routine clinical information and cost-effectiveness*

16  
17 223 Clinical information will be extracted from the medical notes including: age, gender, ethnicity, primary  
18  
19 224 cause of kidney failure, transplant type, transplant vintage, dialysis duration, comorbidities,  
20  
21 225 blood/urine results, current medication, and smoking habits. This information will be used to primarily  
22  
23 226 capture confounding variables and during analyses of differences and similarities between groups.

24  
25 227 A questionnaire will be administered at baseline to capture the previous 3 months of self-reported  
26  
27 228 healthcare utilisation including: inpatient and outpatient appointments, emergency care, community  
28  
29 229 and primary care services, support services, and changes in medications. This will be compared to data  
30  
31 230 gathered from healthcare records allowing validation of the questionnaire for future cost-  
32  
33 231 effectiveness analyses.

### 34 35 232 *Cardiac stress MRI*

36  
37 233 All participants will undergo a comprehensive adenosine-stress perfusion CMR scans at baseline and  
38  
39 234 on study-completion. Participants will be scanned on a 3T platform (Skyra, Siemens Medical Imaging,  
40  
41 235 Erlangen, Germany) with an 18-channel phased-array receiver coil. New-generation gadolinium-based  
42  
43 236 contrast agent with a licence for use in patients with an eGFR >30 ml/min/1.73 m<sup>2</sup> will be given for  
44  
45 237 perfusion and delayed enhancement imaging. Patients with an eGFR <40 ml/min/1.73 m<sup>2</sup> will undergo  
46  
47 238 non-contrast CMR scanning without gadolinium. Scans will quantitatively define:

- 48 239 • Left and right-ventricular structure and function (left ventricular mass, left and right  
49  
50 240 ventricular volumes and ejection fractions);<sup>49</sup>
- 51 241 • Tissue-characterisation with native and post-contrast T1 mapping and delayed gadolinium  
52  
53 242 enhancement;<sup>50-52</sup>
- 54 243 • Myocardial systolic-strain and peak early-diastolic strain rate;<sup>23</sup>
- 55 244 • Quantitative perfusion imaging (coronary blood-flow to quantify coronary reserve and  
56  
57 245 ischaemia);<sup>53</sup>
- 58 246 • Aortic distensibility.<sup>21</sup>

### 59 60 247 *Quadriceps MRI*

248 At the end of the CMR scan, participants will immediately undergo an MRI scan of the quadriceps  
249 muscle in their right leg to assess muscle size and muscle quality as previously described.<sup>54</sup>

#### 250 *Cardiopulmonary exercise test*

251 A CPET utilising a standardised ramp protocol will be performed on a stationary electronically braked  
252 cycle ergometer (Lode Excalibur Sport, Groningen, Netherlands) with increasing workload (1 watt (W)  
253 every 4 sec (10-15 w/min)) ensuring volitional exhaustion within 12-15 min<sup>55</sup>. Participants will be  
254 encouraged to cycle at a continuous cadence (~70 rpm). The highest oxygen uptake will be measured  
255 ( $\text{VO}_2\text{peak}$ ) using a simultaneous gas analyser (Metalyser 3B CPX System, CORTEX, Germany) as true  
256 maximal (plateau)  $\text{VO}_2$  ( $\text{VO}_2\text{max}$ ) is less commonly achieved in deconditioned and/or clinical patients.  
257 The test will be in the presence of a cardiac nurse to confirm safety to commence exercise training. A  
258 non-invasive monitor (Moxy, Fortiori Design LLC., Minnesota, USA) will be worn on the quadriceps  
259 muscle which uses near infrared spectroscopy (NIRS) to measure local oxygen saturation ( $\text{SmO}_2$ ) and  
260 total haemoglobin (THb) of the muscle.

#### 261 *Lower limb Strength and muscular endurance*

262 Isometric and isokinetic muscle (knee extension) strength, of the dominant leg, will be assessed using  
263 a dynamometer (Biodex System 4, Biodex Medical Systems Inc., New York, USA). Peak isometric  
264 strength (torque, Nm) will be assessed from three repetitions of maximum effort at 90° knee flexion  
265 for ~3-5 sec with 60 sec rest. Isokinetic strength will be assessed at three speeds for one set of five  
266 repetitions at each speed: 60°/sec, 90°/sec, and 120°/sec. Participants will perform a 'sit-to-stand-60'  
267 (STS-60) test measuring how many sit-to-stand cycles can be performed over 60 sec.

#### 268 *Handgrip strength*

269 Peak grip strength of the left and right hands will be assessed with a hand dynamometer (Jamar Plus+;  
270 Sammons Preston, Bolingbrook, IL). Each hand will be alternatively tested for three attempts each and  
271 the highest value on each hand will be recorded.

#### 272 *Gait speed*

273 A 4 m walk test will be used to assess gait speed. Participants will be asked to walk 4 m at their 'usual  
274 walking pace' for one practice and two, timed trials. The average score (m/sec) of the timed trials will  
275 be recorded.

#### 276 *Functional mobility*

277 The 'timed-up-and-go' test (TUAG) will be used to assess functional mobility.<sup>56 57</sup> The participant is  
278 timed whilst rising from the seated position on a chair, walking 3m, turning around, and returning to  
279 a seated position.

1  
2  
3 280 *Balance and postural stability*  
4

5 281 Postural stability and balance will be assessed using a previously reported method<sup>58</sup> with a FysioMeter  
6 282 device (modified Nintendo Wii balance-board (Nintendo, Kyoto, Japan)) connected via Bluetooth to  
7  
8 283 software on a portable computer (FysioMeter ApS, Brønderslev, Denmark).

9  
10  
11 284 *Quadriceps ultrasound and myotonometry*  
12

13 285 Rectus femoris anatomical cross-sectional area will be measured from the right leg using B-mode 2D  
14 286 ultrasonography (Clarius C3 HD Scanner, Clarius, Burnaby BC, Canada; 6 MHz) under resting conditions  
15  
16 287 with the participant lying prone at a 45° as previously described.<sup>54</sup> Rectus femoris and vastus lateralis  
17 288 thickness, subcutaneous fat thickness, and fibre pennation angles will be obtained. Measurements of  
18  
19 289 the viscoelastic properties of the soft tissue above the mid-point of the rectus femoris muscle will be  
20  
21 290 obtained using a myotonometry device (MyotonPro, Tallinn, Estonia).

22  
23  
24 291 *Anthropometric measures*  
25

26 292 Anthropometric measures of height, body mass, and waist and hip circumference will be attained in  
27  
28 293 accordance with standard protocols.<sup>59</sup> Bioelectrical impedance analysis (BIA) performed on an InBody  
29 294 analyser (InBody 370, Chicago, Illinois, USA) will be used to estimate body composition (eg. body fat  
30  
31 295 percentage, fat-free mass) and is validated for use in patients with CKD.<sup>60 61</sup>

32  
33 296 *Survey pack*  
34

35 297 Participants will be provided with a survey pack containing the following questionnaires:

- 36  
37 298 (1) Integrated Palliative Outcome Scale (I-POS-Renal): a validated questionnaire measuring the  
38 299 presence and severity of disease related symptoms. The I-POS-Renal was developed based on  
39  
40 300 the POS and IPOS palliative care surveys, but with the additional inclusion of symptoms  
41  
42 301 common in CKD such as pruritus and restless legs.<sup>62</sup>
- 43  
44 302 (2) 12-Item Short Form Health Survey (SF-12): a validated 12-item questionnaire used to assess  
45  
46 303 generic health outcomes from the patient's perspective.<sup>63</sup>
- 47  
48 304 (3) Functional Assessment of Chronic Illness Therapy-Fatigue (FACIT-F): a validated 13-item  
49 305 multidimensional scale that assesses fatigue over the past seven days using a 5-point Likert  
50  
51 306 scale that covers physical fatigue, functional fatigue, emotional fatigue, and social  
52  
53 307 consequences of fatigue with excellent internal consistency and test-retest reliability.<sup>64 65</sup>
- 54  
55 308 (4) Pittsburgh Sleep Quality Index (PSQI): self-rated questionnaire which assesses sleep quality  
56  
57 309 and disturbances over a 1-month time interval.<sup>66</sup>
- 58  
59 310 (5) Patient Activation Measure (PAM): a validated, licenced tool that has been extensively tested  
60 311 with reviewed findings from a large number of studies. It measures the spectrum of

312 knowledge, skills, and confidence in patients and captures the extent to which they feel  
313 engaged and confident in taking care of their condition ('activation').<sup>67</sup>

314 (6) Brief Health Literacy Screen (BHLS): a 3-item questionnaire to identify inadequate health  
315 literacy,<sup>68</sup> validated against longer screening tools in populations with ESKD.<sup>69,70</sup>

316 (7) The Global Physical Activity Questionnaire (GPAQ): developed by the World Health  
317 Organisation (WHO) for physical activity surveillance in countries. It collects information on  
318 physical activity participation in three settings or domains (activity at work, travel to and from  
319 places, and recreational activities) as well as sedentary behaviour, comprising 16 questions.<sup>71</sup>

320 (8) Duke Activity Status Index (DASI): a 12-item questionnaire that uses self-reported physical  
321 work capacity to estimate peak metabolic equivalents and has been shown to be a valid  
322 measurement of functional capacity.<sup>72</sup>

### 323 *Habitual physical activity*

324 Objective data on habitual physical activity levels over a 7-day period (ideal minimum 6-days)<sup>73</sup> will be  
325 gained from tri-axial accelerometers (GENEActiv, ActivInsights Ltd., Cambridge, UK).

### 326 *Blood and urine sampling*

327 Venous blood (30 ml) will be collected using venepuncture of the antecubital vein and prepared and  
328 stored appropriately for the following analysis:

- 329 • Circulating markers of cardiovascular disease
- 330 • Circulating markers of systemic inflammation and oxidative stress
- 331 • Blood glucose and HbA1c
- 332 • Lipids and triglycerides
- 333 • Full blood count and renal profile

334 A urine sample will be requested to ascertain urinary protein:creatinine ratio.

### 335 **Follow-up assessments**

336 Follow up visits are summarised in Figure 1. An instructional session (or more if required) following  
337 baseline assessments will allow the intervention group to become familiar with the exercise  
338 requirements and allow the research team to ensure safety and competence before commencing the  
339 12-week home-based training program. This can be via video call or in-person. At 6 weeks into the 12-  
340 week period for the intervention group only, participants will be invited to review exercise progression  
341 (via video call or in-person), particularly if participants are struggling to undertake the requisite  
342 amount of exercise, and as a refresher of the intervention. This combined with regular contact from  
343 research staff should aid participant compliance and monitoring.

1  
2  
3 344 Final assessments will be conducted for the exercise and control groups within 7 days of completing  
4  
5 345 the 12-week exercise or control period. Assessments completed will be identical to the baseline visit  
6  
7 346 with the addition of a 'patient satisfaction questionnaire' to allow pragmatic development of the  
8  
9 347 study. This will also be offered to participants who withdraw from the trial. Three months after  
10  
11 348 completing the exercise intervention, participants will be contacted for a semi-structured one-to-one  
12  
13 349 telephone interview. This will aim to understand the impact of the intervention, if any, on subsequent  
14  
15 350 lifestyle and exercise habits.

### 15 351 **Sub-studies**

16  
17 352 Additional informed consent will be sought for:

- 18  
19 353 1. Ten 'healthy' control participants to undertake a CPET to assess the differences, if any,  
20  
21 354 between CPET parameters in 'healthy controls' versus KTRs, particularly during the recovery  
22  
23 355 period.
- 24  
25 356 2. KTRs completing the exercise intervention will be invited to undertake a semi-structured  
26  
27 357 interview (via telephone, video call, or in-person) incorporating exercise self-efficacy,  
28  
29 358 enjoyment, difficulties encountered, perceived advantages and disadvantages of the  
30  
31 359 intervention, and study design. Participants who withdraw before the end of the intervention  
32  
33 360 will also be invited to attend, although in line with ethical standards, this will be optional.

### 34 361 **Sample size**

35  
36 362 The purpose of this pilot study is to obtain appropriate data to adequately power future definitive  
37  
38 363 trials;<sup>74</sup> a power calculation is neither relevant nor possible. A minimum sample size of 50 is based on  
39  
40 364 accepted values to provide adequate estimates of standard deviations for future power calculations.<sup>75</sup>

### 41 365 **Data collection and management**

42  
43 366 Data from all time points will be collected in case report forms (CRFs) by the trial team. All data will  
44  
45 367 be entered into a secure database and will only be accessible on password-protected computers at  
46  
47 368 UHL and University of Leicester by relevant members of the study team. No identifying information  
48  
49 369 will be kept in electronic form. All source data and original participant identities will be kept in a locked  
50  
51 370 office in the trial site file only at UHL.

### 52 371 **Data analysis**

53  
54 372 Data will be assessed for normality using histograms, the Shapiro-Wilk test and Q-Q plots. Continuous  
55  
56 373 data to be expressed as mean ( $\pm$  standard deviation), if normally distributed or median (interquartile  
57  
58 374 range) if not. To investigate the differences between interventions we will use analysis of (co-)  
59  
60 375 variance. Independent samples t-tests and Mann-Whitney U tests will be used assess for baseline



1  
2  
3 376 differences between variables for normally and non-normally distributed data respectively. These  
4  
5 377 data will be used to inform the power calculation for future definitive trials.

6  
7 378 Qualitative data will be transcribed verbatim and analysed according to the principles of interpretive  
8  
9 379 thematic analysis to explore themes emerging from patient journeys through, and experiences of, the  
10  
11 380 interventions and outcome measures.

12  
13 381 Outcomes pertaining to the feasibility of the intervention and trial will be assessed and include:

- 14  
15 382 • *Eligibility*: the percentage of patients screened who are eligible.  
16  
17 383 • *Recruitment rate*: the percentage of patients eligible who consent to the trial and the monthly  
18 384 recruitment rate.  
19  
20 385 • *Adherence to the exercise intervention*: the number of completed sessions per week and  
21 386 specific intensity and durations achieved.  
22  
23 387 • *Acceptability of randomisation*: comparison of the final group characteristics and  
24 388 identification of any stratification variables, if applicable.  
25  
26 389 • *Attrition rate*: the number of participants that drop-out of the study.  
27  
28 390 • *Outcome acceptability*: the percentage of missing data for each outcome measure.  
29  
30 391 • *Safety*: The number of self-reported injuries or adverse events throughout the trial.

31  
32 392 The *a priori* thresholds for specific feasibility and acceptability criteria are as follows: eligibility ( $\geq 50\%$ ),  
33 393 recruitment success of 20% of eligible participants ( $\geq 2$  participants per month), adherence (an average  
34 394 of 3 exercise sessions per week) and attrition ( $\leq 30\%$ ).

### 35 36 37 38 395 **Safety reporting**

39  
40 396 All adverse events (AEs) or adverse reactions (ARs) and serious adverse events (SAEs) or serious  
41 397 adverse reactions (SARs) will be recorded from the time a patient enters the study to the final study  
42 398 visit. Each AE or AR will be considered for severity, causality, and expectedness and may be reclassified  
43 399 as an SAE or SAR if required.

44  
45  
46  
47 400 An SAE is any AE that:

- 48  
49 401 • is life threatening  
50 402 • requires hospitalization or prolongation of a hospital admission  
51 403 • results in a persistent or significant disability/incapacity  
52 404 • is a congenital anomaly  
53 405 • results in death

54  
55  
56  
57 406 All AEs and ARs will be documented in participants CRFs, medical notes, and an AE log and will record  
58 407 the following information: description, date of onset and end date, severity, assessment of  
59  
60

1  
2  
3 408 relatedness to study, other suspect device and action taken. Only AEs that are judged to be related to  
4  
5 409 the study intervention or procedures will be reported to the sponsor.

6 410 All SAEs will be reported by the investigators to the sponsor within 24 hours of discovery or notification  
7  
8 411 and the report will be signed by the chief investigator within 7 days. If the SAE is deemed related to  
9  
10 412 the research procedures or intervention and is unexpected, a report will be sent to the research ethics  
11  
12 413 committee (REC) within 15 days.

#### 13 414 **Patient and public involvement**

15 415 A patient and public involvement (PPI) group has been convened and will meet with the research team  
16  
17 416 to review progress and address issues that arise throughout the duration of the study. The PPI partners  
18  
19 417 will assist in the interpretation and dissemination of results. The trial was designed in consultation  
20  
21 418 with PPI partners who advised on intervention content and outcome measure acceptability, paying  
22  
23 419 particular attention to patient burden, ensuring outcome measures would not over-burden  
24  
25 420 participants. The PPI group approved the final design and duration of this intervention and advised  
26  
27 421 the inclusion of an initial supervised intervention familiarisation period to build confidence in exercise  
28  
29 422 capability.

#### 30 423 **Changes to the study protocol following the COVID-19 pandemic**

31 424 The COVID-19 pandemic has made us all review the ways we design and deliver clinical studies. Whilst  
32  
33 425 patient safety remains the absolute priority of clinical and research teams, there is a need for research  
34  
35 426 to continue in a safe way that balances the benefits of continuing programs of research against the  
36  
37 427 risks from COVID-19. We have amended the study protocol in several ways to reduce any additional  
38  
39 428 exposure of patients to clinical environments where COVID-19 may be present:

- 40 429 • We have reduced the number of study visits to a minimum. The original study flow diagram is  
41  
42 430 included in Additional file 1. All interim assessments have been removed in the modified  
43  
44 431 protocol (Fig. 1) and the baseline and final study visits are now wrapped into part of patient  
45  
46 432 clinical care. That is to say, when they attend for their baseline and follow-up study visits they  
47  
48 433 will have their clinical review and clinical blood tests as they would for their normal clinical  
49  
50 434 care with a transplant nephrologist (MGB), so there is no increase in-patient visits to a clinical  
51  
52 435 environment over-and-above their normal care.
- 52 436 • The original study design included a 2-week face-to-face training period where participants  
53  
54 437 would attend the hospital to learn how to complete the exercises and the exercise program  
55  
56 438 with a member of the research team. This training period will now be done remotely, via video  
57  
58 439 conferencing, with discussion and feedback over the telephone and using the instructional  
59  
60 440 videos and literature that support the home-based exercise intervention.

- 1  
2  
3 441       • When participants attend for their study visits, departmental procedures have been updated  
4  
5 442       to now include meticulous cleaning of all equipment before and after use, one-way flows of  
6  
7 443       participants to ensure participants do not mix, and the use of personal protective equipment  
8  
9 444       for all staff and participants.

10 445   The above changes have been agreed with the local REC and the study sponsor and have allowed  
11  
12 446   recommencement of study recruitment and procedures.

## 14 447   **DISCUSSION**

16 448   This pilot study is designed to assess the feasibility of delivering a structured, home-based, exercise  
17  
18 449   intervention in KTRs at increased cardiometabolic risk and evaluate the putative effects on  
19  
20 450   cardiovascular structure and functional changes, cardiorespiratory fitness, quality of life, healthcare  
21  
22 451   utilisation, patient activation, and engagement with the prescribed exercise program. It is the first trial  
23  
24 452   to use a pragmatic home-based program of exercise this patient group. It is also the first to use CMR  
25  
26 453   to evaluate the structural and functional changes of the heart in this at risk population.

27 454   Qualitative data will provide valuable personal perspectives on the acceptability of this specific  
28  
29 455   exercise program. Transplant recipients experience complex medical journeys and are likely to have  
30  
31 456   specific unmet needs in the area of exercise and lifestyle. This will be valuable information for future  
32  
33 457   randomised controlled trials (RCTs) and exercise guideline development.

34 458   Home-based intervention outcomes are reliant on accurate reporting by participants with regards to  
35  
36 459   frequency, intensity, and duration of exercise performed. This is often a limitation of unsupervised  
37  
38 460   interventions. We will ensure participants are correctly advised of how to monitor and report their  
39  
40 461   exercise completion throughout the trial and encourage this through telephone communications.

41 462   We anticipate that a positive outcome will lead to both an increased understanding of the specific  
42  
43 463   exercise requirements of KTRs and the development of new programs that promote longer-term  
44  
45 464   engendered lifestyle change that can be incorporated into standard practice with much lower financial  
46  
47 465   implications than in-centre supervised rehabilitation.

48 466

49 467

50 468

51 469

52 470

53 471

54 472

1  
2  
3 473 **DECLARATIONS**  
4

5 474

6 475 **Ethical issues**  
7

8 476  
9

10 477 University of Leicester are the sponsor for this study (UOL 0714). The protocol was reviewed by the  
11 478 East Midlands-Nottingham 2 research ethics committee and was given a favourable opinion (REC ref  
12 479 19/EM/0209) on 14/10/2019. Health Research Authority regulatory approval was given on  
13 480 14/10/2019, and the study was adopted on the National Institute for Health Research (NIHR) portfolio  
14 481 on 26/09/2019. Local governance approval was granted by UHL R&I on 31/01/2020. This study was  
15 482 prospectively registered with ClinicalTrials.gov (NCT04123951; 11.10.2019). This manuscript is  
16 483 quorate with the most recent approved protocol (version 5 01.05.2020). Relevant parties will be  
17 484 informed of any substantial protocol modifications. Steps have been taken when designing this  
18 485 protocol to minimise the ethical implications and ensure patient welfare. The study will comply with  
19 486 the International Conference for Harmonisation of Good Clinical Practice (ICH GCP) guidelines and the  
20 487 Research Governance Framework for Health and Social Care.  
21  
22  
23  
24  
25  
26  
27

28 488

29  
30 489 **Twitter:** REB, @RBillany; MGB, @DrMattGB.  
31

32 490

33 491 **Author contributions:** MGB is the chief investigator for this trial. REB and MGB wrote this manuscript.  
34 492 All authors contributed to the development of the study design and protocol lead by MGB. All authors  
35 493 reviewed and approved the final version of this manuscript.  
36  
37  
38

39 494

40 495 **Funding:** This study is funded by a project grant from Kidney Research UK (ref: KS\_RP\_003\_20180913).  
41 496 Neither the sponsor nor the funder had or will have any input into study design; collection,  
42 497 management, analysis, and interpretation of data; writing of the report; or the decision to submit the  
43 498 report for publication.  
44  
45  
46

47 499

48 500 **Acknowledgements:** This research is supported by the National Institute for Health Research (NIHR)  
49 501 Leicester Biomedical Research Centre. The views expressed are those of the authors and not  
50 502 necessarily those of the NHS, the NIHR or the Department of Health.  
51  
52

53 503

54  
55 504 **Competing interests:** None declared.  
56

57 505  
58  
59  
60

1  
2  
3 506 **Availability of data:** On completion the results of this study will be published in peer-reviewed journals  
4  
5 507 and presented at national and international conferences. Contributions of all authors to manuscripts  
6  
7 508 arising from this study will be made explicit in the relevant of each individual journal. Participant level  
8  
9 509 data will be available following publication of results on request to the Chief Investigator. Results will  
10  
11 510 also be disseminated to the patient and public community via social media and newsletter articles and  
12  
13 511 presentations at patient conferences and forums, led by the patient partners. It is anticipated that the  
14  
15 512 results of this study will inform future design of larger RCTs in this subject area and contribute to  
16  
17 513 future specific physical activity guidelines in this population.  
18  
19 514

20 515 **Consent for publication:** Not applicable.  
21  
22 516  
23 517  
24 518  
25 519  
26 520  
27 521  
28 522  
29 523  
30 524  
31 525  
32 526  
33 527  
34 528  
35 529  
36 530  
37 531  
38 532  
39 533  
40 534  
41  
42  
43  
44  
45  
46  
47  
48  
49  
50  
51  
52  
53  
54  
55  
56  
57  
58  
59  
60

## 535 REFERENCES

- 536
- 537 1. Steenkamp R, Rao A, Fraser S. UK Renal Registry 18th Annual Report (December 2015) Chapter 5:  
538 Survival and Causes of Death in UK Adult Patients on Renal Replacement Therapy in 2014:  
539 National and Centre-specific Analyses. *Nephron* 2016;132 Suppl 1:111-44. doi:  
540 10.1159/000444819 [published Online First: 2016/04/27]
- 541 2. Neale J, Smith AC. Cardiovascular risk factors following renal transplant. *World J Transplant*  
542 2015;5(4):183-95. doi: 10.5500/wjt.v5.i4.183
- 543 3. UK Renal Registry. UK Renal Registry 21st Annual Report – data to 31/12/2017. Bristol, UK, 2019.
- 544 4. Kasiske BL, Guijarro C, Massy ZA, et al. Cardiovascular disease after renal transplantation. *J Am Soc*  
545 *Nephrol* 1996;7(1):158-65. [published Online First: 1996/01/01]
- 546 5. Carpenter MA, John A, Weir MR, et al. BP, cardiovascular disease, and death in the Folic Acid for  
547 Vascular Outcome Reduction in Transplantation trial. *J Am Soc Nephrol* 2014;25(7):1554-62.  
548 doi: 10.1681/asn.2013040435 [published Online First: 2014/03/15]
- 549 6. Mall G, Huther W, Schneider J, et al. Diffuse intermyocardiocytic fibrosis in uraemic patients.  
550 *Nephrol Dial Transplant* 1990;5(1):39-44. doi: 10.1093/ndt/5.1.39 [published Online First:  
551 1990/01/01]
- 552 7. Bakri RS, Afzali B, Covic A, et al. Cardiovascular disease in renal allograft recipients is associated with  
553 elevated sialic acid or markers of inflammation. *Clin Transpl* 2004;18(2):201-04. doi:  
554 10.1111/j.1399-0012.2004.00156.x
- 555 8. Liefeldt L, Budde K. Risk factors for cardiovascular disease in renal transplant recipients and  
556 strategies to minimize risk. *Transplant International* 2010;23(12):1191-204. doi:  
557 10.1111/j.1432-2277.2010.01159.x
- 558 9. Van Laecke S, Malfait T, Schepers E, et al. Cardiovascular disease after transplantation: an emerging  
559 role of the immune system. *Transpl Int* 2018;31(7):689-99. doi: 10.1111/tri.13160 [published  
560 Online First: 2018/04/04]
- 561 10. Weiner DE, Tighiouart H, Elsayed EF, et al. The Framingham predictive instrument in chronic kidney  
562 disease. *J Am Coll Cardiol* 2007;50(3):217-24. doi: 10.1016/j.jacc.2007.03.037 [published  
563 Online First: 2007/07/17]
- 564 11. Aalten J, Peeters SA, van der Vlugt MJ, et al. Is standardized cardiac assessment of asymptomatic  
565 high-risk renal transplant candidates beneficial? *Nephrol Dial Transplant* 2011;26(9):3006-12.  
566 doi: 10.1093/ndt/gfq822 [published Online First: 2011/02/16]
- 567 12. Kasiske BL. Epidemiology of cardiovascular disease after renal transplantation. *Transplantation*  
568 2001;72(6 Suppl):S5-8. doi: 10.1097/00007890-200109271-00003 [published Online First:  
569 2001/10/05]
- 570 13. de Albuquerque Suassuna P, Sanders-Pinheiro H, de Paula R. Uremic Cardiomyopathy: A New Piece  
571 in the Chronic Kidney Disease-Mineral and Bone Disorder Puzzle. *Front Med (Lausanne)*  
572 2018;5:206-06. doi: 10.3389/fmed.2018.00206
- 573 14. Aoki J, Ikari Y, Nakajima H, et al. Clinical and pathologic characteristics of dilated cardiomyopathy  
574 in hemodialysis patients. *Kidney Int* 2005;67(1):333-40. doi: 10.1111/j.1523-  
575 1755.2005.00086.x [published Online First: 2004/12/22]
- 576 15. Mark PB, Doyle A, Blyth KG, et al. Vascular function assessed with cardiovascular magnetic  
577 resonance predicts survival in patients with advanced chronic kidney disease. *J Cardiovasc*  
578 *Magn Reson* 2008;10:39. doi: 10.1186/1532-429x-10-39 [published Online First: 2008/08/19]
- 579 16. Foley RN, Parfrey PS, Harnett JD, et al. Clinical and echocardiographic disease in patients starting  
580 end-stage renal disease therapy. *Kidney Int* 1995;47(1):186-92. doi: 10.1038/ki.1995.22  
581 [published Online First: 1995/01/01]
- 582 17. Foley RN, Parfrey PS, Harnett JD, et al. The prognostic importance of left ventricular geometry in  
583 uremic cardiomyopathy. *J Am Soc Nephrol* 1995;5(12):2024-31. [published Online First:  
584 1995/06/01]

- 1  
2  
3 585 18. Ali A, Macphee I, Kaski JC, et al. Cardiac and vascular changes with kidney transplantation. *Indian*  
4 586 *J Nephrol* 2016;26(1):1-9. doi: 10.4103/0971-4065.165003
- 5 587 19. Patel RK, Mark PB, Johnston N, et al. Renal Transplantation Is Not Associated with Regression of  
6 588 Left Ventricular Hypertrophy: A Magnetic Resonance Study. *Clin J Am Soc Nephrol*  
7 589 2008;3(6):1807-11. doi: 10.2215/cjn.01400308
- 8 590 20. Devine PA, Courtney AE, Maxwell AP. Cardiovascular risk in renal transplant recipients. *J Nephrol*  
9 591 2019;32(3):389-99. doi: 10.1007/s40620-018-0549-4 [published Online First: 2018/11/07]
- 10 592 21. Graham-Brown MPM, Adenwalla SF, Lai FY, et al. The reproducibility of cardiac magnetic  
11 593 resonance imaging measures of aortic stiffness and their relationship to cardiac structure in  
12 594 prevalent haemodialysis patients. *Clin Kidney J* 2018;11(6):864-73. doi: 10.1093/ckj/sfy042
- 13 595 22. Graham-Brown MPM, Rutherford E, Levelt E, et al. Native T1 mapping: inter-study, inter-observer  
14 596 and inter-center reproducibility in hemodialysis patients. *J Cardiovasc Magn Reson* 2017;19(1)  
15 597 doi: 10.1186/s12968-017-0337-7
- 16 598 23. Graham-Brown MP, Gulsin GS, Parke K, et al. A comparison of the reproducibility of two cine-  
17 599 derived strain software programmes in disease states. *Eur J Radiol* 2019;113:51-58. doi:  
20 600 10.1016/j.ejrad.2019.01.026 [published Online First: 2019/04/01]
- 21 601 24. Jebb SA, Moore MS. Contribution of a sedentary lifestyle and inactivity to the etiology of  
22 602 overweight and obesity: current evidence and research issues. *Med Sci Sports Exerc*  
23 603 1999;31(11 Suppl):S534-41. doi: 10.1097/00005768-199911001-00008 [published Online  
24 604 First: 1999/12/11]
- 25 605 25. Kriska AM, Saremi A, Hanson RL, et al. Physical activity, obesity, and the incidence of type 2  
26 606 diabetes in a high-risk population. *Am J Epidemiol* 2003;158(7):669-75. doi:  
27 607 10.1093/aje/kwg191 [published Online First: 2003/09/26]
- 28 608 26. Pereira MA, Folsom AR, McGovern PG, et al. Physical activity and incident hypertension in black  
29 609 and white adults: the Atherosclerosis Risk in Communities Study. *Prev Med* 1999;28(3):304-  
30 610 12. doi: 10.1006/pmed.1998.0431 [published Online First: 1999/03/12]
- 31 611 27. Swift DL, Lavie CJ, Johannsen NM, et al. Physical activity, cardiorespiratory fitness, and exercise  
32 612 training in primary and secondary coronary prevention. *Circ J* 2013;77(2):281-92. doi:  
33 613 10.1253/circj.cj-13-0007 [published Online First: 2013/01/19]
- 34 614 28. Barengo NC, Hu G, Lakka TA, et al. Low physical activity as a predictor for total and cardiovascular  
35 615 disease mortality in middle-aged men and women in Finland. *Eur Heart J* 2004;25(24):2204-  
36 616 11. doi: 10.1016/j.ehj.2004.10.009 [published Online First: 2004/12/14]
- 37 617 29. Nielens H, Lejeune TM, Lalaoui A, et al. Increase of physical activity level after successful renal  
38 618 transplantation: a 5 year follow-up study. *Nephrol Dial Transplant* 2001;16(1):134-40. doi:  
39 619 10.1093/ndt/16.1.134 [published Online First: 2001/02/24]
- 40 620 30. Dontje ML, de Greef MH, Krijnen WP, et al. Longitudinal measurement of physical activity following  
41 621 kidney transplantation. *Clin Transplant* 2014;28(4):394-402. doi: 10.1111/ctr.12325  
42 622 [published Online First: 2014/03/19]
- 43 623 31. Wilkinson TJ, Clarke AL, Nixon DGD, et al. Prevalence and correlates of physical activity across  
44 624 kidney disease stages: an observational multicentre study. *Nephrol Dial Transpl* 2019 doi:  
45 625 10.1093/ndt/gfz235
- 46 626 32. Booth FW, Roberts CK, Laye MJ. Lack of exercise is a major cause of chronic diseases. *Compr Physiol*  
47 627 2012;2(2):1143-211. doi: 10.1002/cphy.c110025 [published Online First: 2012/04/01]
- 48 628 33. Booth FW, Laye MJ, Roberts MD. Lifetime sedentary living accelerates some aspects of secondary  
49 629 aging. *J Appl Physiol* 2011;111(5):1497-504. doi: 10.1152/jappphysiol.00420.2011 [published  
50 630 Online First: 2011/08/13]
- 51 631 34. Didsbury M, McGee RG, Tong A, et al. Exercise training in solid organ transplant recipients: a  
52 632 systematic review and meta-analysis. *Transplantation* 2013;95(5):679-87. doi:  
53 633 10.1097/TP.0b013e31827a3d3e [published Online First: 2013/02/01]
- 54  
55  
56  
57  
58  
59  
60

- 1  
2  
3 634 35. Mathur S, Janaudis-Ferreira T, Wickerson L, et al. Meeting Report: Consensus Recommendations  
4 635 for a Research Agenda in Exercise in Solid Organ Transplantation. *Am J Transplant*  
5 636 2014;14(10):2235-45. doi: 10.1111/ajt.12874  
6  
7 637 36. Masajtis-Zagajewska A, Muras K, Nowicki M. Effects of a Structured Physical Activity Program on  
8 638 Habitual Physical Activity and Body Composition in Patients With Chronic Kidney Disease and  
9 639 in Kidney Transplant Recipients. *Exp Clin Transplant* 2019;17(2):155-64. doi:  
10 640 10.6002/ect.2017.0305 [published Online First: 2018/05/17]  
11 641 37. O'Connor EM, Koufaki P, Mercer TH, et al. Long-term pulse wave velocity outcomes with aerobic  
12 642 and resistance training in kidney transplant recipients - A pilot randomised controlled trial.  
13 643 *PLoS One* 2017;12(2):e0171063. doi: 10.1371/journal.pone.0171063 [published Online First:  
14 644 2017/02/06]  
15 645 38. Moraes Dias CJ, Anaisse Azoubel LM, Araujo Costa H, et al. Autonomic modulation analysis in active  
16 646 and sedentary kidney transplanted recipients. *Clin Exp Pharmacol Physiol* 2015;42(12):1239-  
17 647 44. doi: 10.1111/1440-1681.12481 [published Online First: 2015/08/19]  
18 648 39. Roi GS, Stefoni S, Mosconi G, et al. Physical activity in solid organ transplant recipients:  
19 649 organizational aspects and preliminary results of the Italian project. *Transplant Proc*  
20 650 2014;46(7):2345-9. doi: 10.1016/j.transproceed.2014.07.055 [published Online First:  
21 651 2014/09/23]  
22 652 40. Romano G, Simonella R, Falletti E, et al. Physical training effects in renal transplant recipients. *Clin*  
23 653 *Transplant* 2010;24(4):510-4. doi: 10.1111/j.1399-0012.2009.01098.x [published Online First:  
24 654 2009/10/01]  
25 655 41. Kinnafick FE, Thogersen-Ntoumani C, Shepherd SO, et al. In It Together: A Qualitative Evaluation  
26 656 of Participant Experiences of a 10-Week, Group-Based, Workplace HIIT Program for  
27 657 Insufficiently Active Adults. *J Sport Exerc Psychol* 2018;40(1):10-19. doi: 10.1123/jsep.2017-  
28 658 0306 [published Online First: 2018/03/10]  
29 659 42. van Baar ME, Dekker J, Oostendorp RA, et al. Effectiveness of exercise in patients with  
30 660 osteoarthritis of hip or knee: nine months' follow up. *Ann Rheum Dis* 2001;60(12):1123-30.  
31 661 doi: 10.1136/ard.60.12.1123 [published Online First: 2001/11/16]  
32 662 43. Timmons JF, Griffin C, Cogan KE, et al. Exercise Maintenance in Older Adults 1 Year After  
33 663 Completion of a Supervised Training Intervention. *J Am Geriatr Soc* 2020;68(1):163-69. doi:  
34 664 10.1111/jgs.16209  
35 665 44. Hibbard JH, Greene J. What The Evidence Shows About Patient Activation: Better Health Outcomes  
36 666 And Care Experiences; Fewer Data On Costs. *Health Affairs* 2013;32(2):207-14. doi:  
37 667 10.1377/hlthaff.2012.1061  
38 668 45. Skolasky RL, Mackenzie EJ, Wegener ST, et al. Patient activation and adherence to physical therapy  
39 669 in persons undergoing spine surgery. *Spine (Phila Pa 1976)* 2008;33(21):E784-E91. doi:  
40 670 10.1097/BRS.0b013e31818027f1  
41 671 46. Buckingham SA, Taylor RS, Jolly K, et al. Home-based versus centre-based cardiac rehabilitation:  
42 672 abridged Cochrane systematic review and meta-analysis. *Open Heart* 2016;3(2):e000463. doi:  
43 673 10.1136/openhrt-2016-000463 [published Online First: 2016/10/16]  
44 674 47. Baggetta R, D'Arrigo G, Torino C, et al. Effect of a home based, low intensity, physical exercise  
45 675 program in older adults dialysis patients: a secondary analysis of the EXCITE trial. *BMC Geriatr*  
46 676 2018;18(1):248. doi: 10.1186/s12877-018-0938-5 [published Online First: 2018/10/22]  
47 677 48. Borg GA. Perceived exertion: a note on "history" and methods. *Med Sci Sports* 1973;5(2):90-3.  
48 678 [published Online First: 1973/01/01]  
49 679 49. Hunold P, Vogt FM, Heemann UW, et al. Myocardial mass and volume measurement of  
50 680 hypertrophic left ventricles by MRI--study in dialysis patients examined before and after  
51 681 dialysis. *J Cardiovasc Magn Reson* 2003;5(4):553-61. doi: 10.1081/jcmr-120025230 [published  
52 682 Online First: 2003/12/11]  
53  
54  
55  
56  
57  
58  
59  
60



- 1  
2  
3 683 50. Graham-Brown MP, March DS, Churchward DR, et al. Novel cardiac nuclear magnetic resonance  
4 684 method for noninvasive assessment of myocardial fibrosis in hemodialysis patients. *Kidney Int*  
5 685 2016;90(4):835-44. doi: 10.1016/j.kint.2016.07.014 [published Online First: 2016/09/17]  
6 686 51. Xu HY, Yang ZG, Zhang Y, et al. Prognostic value of heart failure in hemodialysis-dependent end-  
7 687 stage renal disease patients with myocardial fibrosis quantification by extracellular volume on  
8 688 cardiac magnetic resonance imaging. *BMC Cardiovasc Disord* 2020;20(1):12. doi:  
9 689 10.1186/s12872-019-01313-2 [published Online First: 2020/01/12]  
10 690 52. Graham-Brown MP, Singh AS, Gulsin GS, et al. Defining myocardial fibrosis in haemodialysis  
11 691 patients with non-contrast cardiac magnetic resonance. *BMC Cardiovasc Disord*  
12 692 2018;18(1):145. doi: 10.1186/s12872-018-0885-2 [published Online First: 2018/07/15]  
13 693 53. Xue H, Brown LAE, Nielles-Vallespin S, et al. Automatic in-line quantitative myocardial perfusion  
14 694 mapping: Processing algorithm and implementation. *Magn Reson Med* 2020;83(2):712-30.  
15 695 doi: 10.1002/mrm.27954 [published Online First: 2019/08/24]  
16 696 54. Gould DW, Watson EL, Wilkinson TJ, et al. Ultrasound assessment of muscle mass in response to  
17 697 exercise training in chronic kidney disease: a comparison with MRI. *J Cachexia Sarcopenia*  
18 698 *Muscle* 2019;10(4):748-55. doi: 10.1002/jcsm.12429  
19 699 55. ATS/ACCP Statement on Cardiopulmonary Exercise Testing. *American Journal of Respiratory and*  
20 700 *Critical Care Medicine* 2003;167(2):211-77. doi: 10.1164/rccm.167.2.211  
21 701 56. Podsiadlo D, Richardson S. The timed "Up & Go": a test of basic functional mobility for frail elderly  
22 702 persons. *J Am Geriatr Soc* 1991;39(2):142-8. doi: 10.1111/j.1532-5415.1991.tb01616.x  
23 703 [published Online First: 1991/02/01]  
24 704 57. Hadjiioannou I, Wong K, Lindup H, et al. Test-retest reliability for physical function measures in  
25 705 patients with chronic kidney disease. *J Ren Care* 2019 doi: 10.1111/jorc.12310  
26 706 58. Wilkinson TJ, Nixon DGD, Smith AC. Postural stability during standing and its association with  
27 707 physical and cognitive functions in non-dialysis chronic kidney disease patients. *Int J Nephrol*  
28 708 *Urol* 2019;51(8):1407-14. doi: 10.1007/s11255-019-02192-4  
29 709 59. Eston RG, Reilly T. Kinanthropometry and exercise physiology laboratory manual : tests,  
30 710 procedures, and data. 3rd ed. Abingdon: Routledge 2009.  
31 711 60. Chertow GM, Lowrie EG, Wilmore DW, et al. Nutritional assessment with bioelectrical impedance  
32 712 analysis in maintenance hemodialysis patients. *J Am Soc Nephrol* 1995;6(1):75-81. [published  
33 713 Online First: 1995/07/01]  
34 714 61. Macdonald JH, Marcora SM, Jibani M, et al. Bioelectrical impedance can be used to predict muscle  
35 715 mass and hence improve estimation of glomerular filtration rate in non-diabetic patients with  
36 716 chronic kidney disease. *Nephrol Dial Transplant* 2006;21(12):3481-7. doi: 10.1093/ndt/gfl432  
37 717 [published Online First: 2006/09/07]  
38 718 62. Raj R, Ahuja K, Frandsen M, et al. Validation of the IPOS-Renal Symptom Survey in Advanced Kidney  
39 719 Disease: A Cross-sectional Study. *J Pain Symptom Manage* 2018;56(2):281-87. doi:  
40 720 10.1016/j.jpainsymman.2018.04.006  
41 721 63. Ware Jr JE, Kosinski M, Keller SD. A 12-Item Short-Form Health Survey: construction of scales and  
42 722 preliminary tests of reliability and validity. *Medical care* 1996;220-33.  
43 723 64. Wang S-Y, Zang X-Y, Liu J-D, et al. Psychometric Properties of the Functional Assessment of Chronic  
44 724 Illness Therapy-Fatigue (FACIT-Fatigue) in Chinese Patients Receiving Maintenance Dialysis. *J*  
45 725 *Pain Symptom Manage* 2015;49(1):135-43. doi: 10.1016/j.jpainsymman.2014.04.011  
46 726 65. Yellen SB, Cella DF, Webster K, et al. Measuring fatigue and other anemia-related symptoms with  
47 727 the Functional Assessment of Cancer Therapy (FACT) measurement system. *J Pain Symptom*  
48 728 *Manage* 1997;13(2):63-74. doi: 10.1016/s0885-3924(96)00274-6 [published Online First:  
49 729 1997/02/01]  
50 730 66. Buysse DJ, Reynolds CF, Monk TH, et al. The Pittsburgh Sleep Quality Index: a new instrument for  
51 731 psychiatric practice and research. *Psychiatry Res* 1989;28(2):193-213. doi: 10.1016/0165-  
52 732 1781(89)90047-4 [published Online First: 1989/05/01]  
53  
54  
55  
56  
57  
58  
59  
60

- 1  
2  
3 733 67. Hibbard JH, Stockard J, Mahoney ER, et al. Development of the Patient Activation Measure (PAM):  
4 734 Conceptualizing and Measuring Activation in Patients and Consumers. *Health Services*  
5 735 *Research* 2004;39(4p1):1005-26. doi: 10.1111/j.1475-6773.2004.00269.x  
6 736 68. Chew LD, Bradley KA, & Boyko EJ. Brief questions to identify patients with inadequate health  
7 737 literacy. *Fam Med*. 2004;36(8):588-594.  
8 738 69. Cavanaugh KL, Osborn CY, Tentori F, et al. Performance of a brief survey to assess health literacy  
9 739 in patients receiving hemodialysis. *Clin Kidney J* 2015;8(4):462-468. doi:10.1093/ckj/sfv037  
10 740 70. Dageforde LA, Cavanaugh KL, Moore DE, et al. Validation of the Written Administration of the  
11 741 Short Literacy Survey. *J Health Commun* 2015;20(7):835-842. doi: 10.1080  
12 742 /10810730.2015.1018572  
13 743 71. Bull FC, Maslin TS, & Armstrong T. Global Physical Activity Questionnaire (GPAQ): Nine Country  
14 744 Reliability and Validity Study. *J Phys Activ Health* 2009;6(6):790-804.  
15 745 72. Hlatky MA , Boineau RE , Higginbotham MB , et al . A brief self-administered questionnaire to  
16 746 determine functional capacity (The Duke Activity Status Index). *Am J Cardiol* 1989;64:651-4.  
17 747 73. Dillon CB, Fitzgerald AP, Kearney PM, et al. Number of Days Required to Estimate Habitual Activity  
18 748 Using Wrist-Worn GENEActiv Accelerometer: A Cross-Sectional Study. *PLOS ONE*  
19 749 2016;11(5):e0109913. doi: 10.1371/journal.pone.0109913  
20 750 74. Moore CG, Carter RE, Nietert PJ, et al. Recommendations for Planning Pilot Studies in Clinical and  
21 751 Translational Research. *J Clin Transl Sci* 2011;4(5):332-37. doi: 10.1111/j.1752-  
22 752 8062.2011.00347.x  
23 753 75. Sim J, Lewis M. The size of a pilot study for a clinical trial should be calculated in relation to  
24 754 considerations of precision and efficiency. *J Clin Epidemiol* 2012;65(3):301-8. doi:  
25 755 10.1016/j.jclinepi.2011.07.011 [published Online First: 2011/12/16]  
26 756  
27 757  
28 758  
29 759  
30 760  
31 761  
32 762  
33 763  
34 764  
35 765  
36 766  
37 767  
38 768  
39 769  
40 770  
41 771  
42 772  
43 773  
44 774  
45  
46  
47  
48  
49  
50  
51  
52  
53  
54  
55  
56  
57  
58  
59  
60

775 **Tables and Figures**

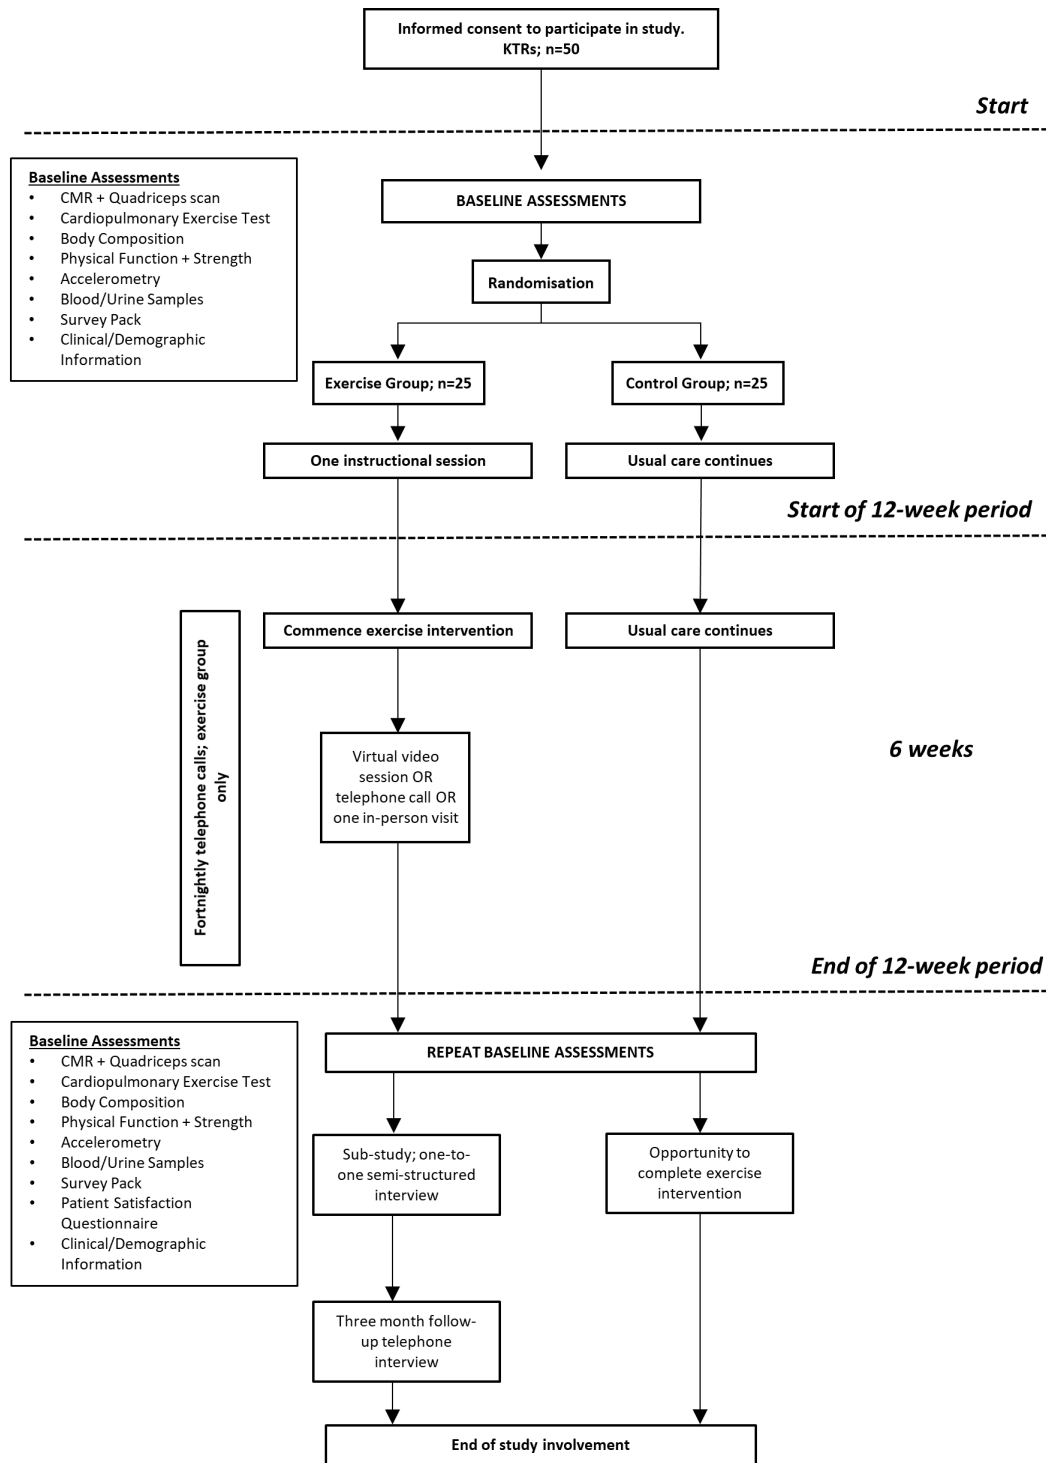

776

777

778

779 **Figure 1. ECSERT study flow diagram**

780

Table 1. ECSERT inclusion and exclusion criteria

| Inclusion Criteria                                                                                                                                                                                                                                                                                                                                                                                                                                                                                                            | Exclusion Criteria                                                                                                                                                                                                                                                                                                                                                                                                                                                                                                                           |
|-------------------------------------------------------------------------------------------------------------------------------------------------------------------------------------------------------------------------------------------------------------------------------------------------------------------------------------------------------------------------------------------------------------------------------------------------------------------------------------------------------------------------------|----------------------------------------------------------------------------------------------------------------------------------------------------------------------------------------------------------------------------------------------------------------------------------------------------------------------------------------------------------------------------------------------------------------------------------------------------------------------------------------------------------------------------------------------|
| <ul style="list-style-type: none"> <li>• Prevalent KTR &gt;1 year</li> <li>• Male or female, aged &gt;18 years old</li> <li>• Willing and able to give informed consent for participation in the study</li> <li>• Increased cardiometabolic risk with at least one of:               <ul style="list-style-type: none"> <li>• Diabetes mellitus</li> <li>• Dyslipidaemia</li> <li>• Hypertension</li> <li>• Obesity (BMI &gt;30)</li> <li>• History of ischaemic heart disease/cerebrovascular disease</li> </ul> </li> </ul> | <ul style="list-style-type: none"> <li>• Inability to give informed consent or comply with testing and exercise protocol for any reason</li> <li>• Unable to undergo CMR scanning (incompatible implants, claustrophobia, allergy to agents etc.)</li> <li>• Female participants who are pregnant, lactating, or planning pregnancy during the course of the study</li> <li>• Scheduled elective surgery or other procedures requiring general anaesthesia during the study</li> <li>• Any other significant disease or disorder*</li> </ul> |

\*i.e. significant co-morbidity including unstable hypertension, potentially lethal arrhythmia, myocardial infarction within 6 months, unstable angina, active liver disease, uncontrolled diabetes mellitus (HbA1c  $\geq$  9%), advanced cerebral or peripheral vascular disease which, in the opinion of the patient's own clinician, may either put the patient at risk because of participation in the study, or may influence the result of the study, or the patient's ability to participate in the study.

781

782

783

784

785

786

787

788

789

790

791

792

793

794

795

796

797

798

799

1  
2  
3  
4  
5  
6  
7  
8  
9  
10  
11  
12  
13  
14  
15  
16  
17  
18  
19  
20  
21  
22  
23  
24  
25  
26  
27  
28  
29  
30  
31  
32  
33  
34  
35  
36  
37  
38  
39  
40  
41  
42  
43  
44  
45  
46  
47  
48  
49  
50  
51  
52  
53  
54  
55  
56  
57  
58  
59  
60

800 **Additional file details**

801 File name: Additional File 1

802 File format: Additional File 1.pdf

803 Title of data: Original ECSERT flow diagram (pre-COVID-19)

804 Description of data: Flow diagram prior to COVID-19 amendments

805

For peer review only

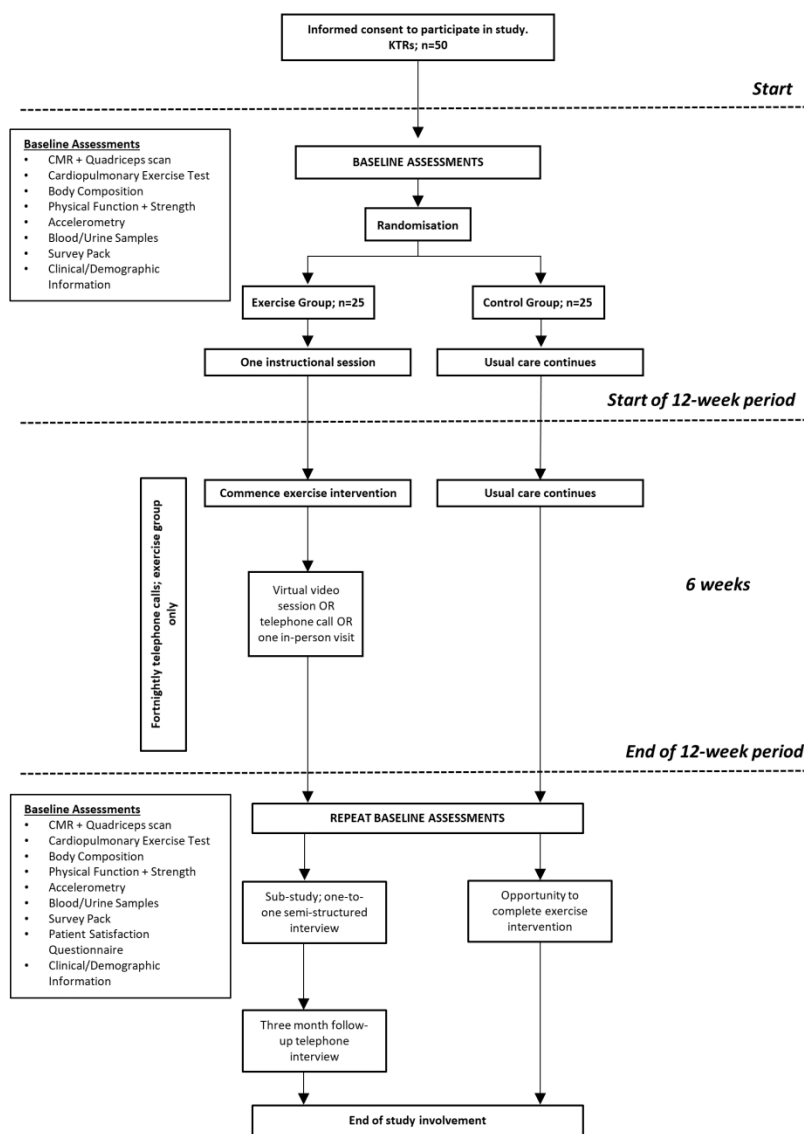

Figure 1. ECSERT study flow diagram

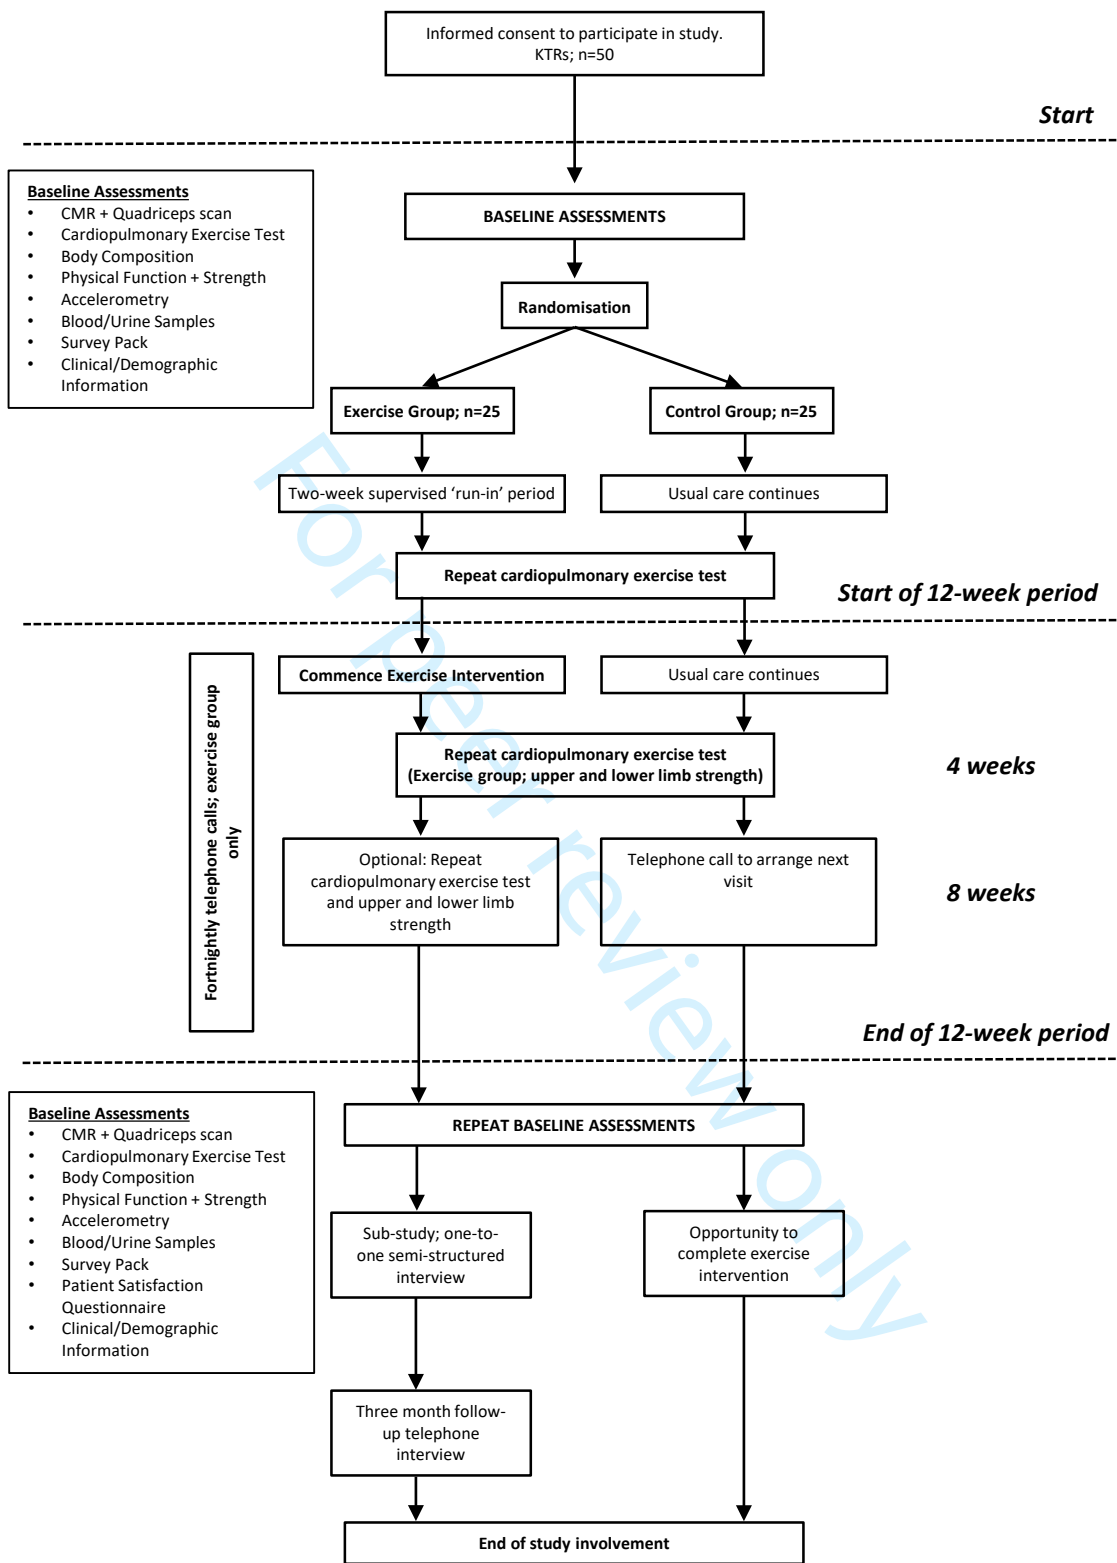

Figure X. Original ECSERT study flow diagram (pre-COVID-19)

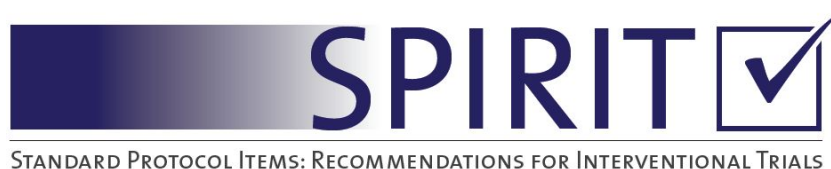

SPIRIT 2013 Checklist: Recommended items to address in a clinical trial protocol and related documents\*

| Section/item                      | Item No | Description                                                                                                                                                                                                                                                                                                 |
|-----------------------------------|---------|-------------------------------------------------------------------------------------------------------------------------------------------------------------------------------------------------------------------------------------------------------------------------------------------------------------|
| <b>Administrative information</b> |         |                                                                                                                                                                                                                                                                                                             |
| Title                             | 1       | Descriptive title identifying the study design, population, interventions, and, if applicable, trial acronym (Page 1, lines 1-3)                                                                                                                                                                            |
| Trial registration                | 2a      | Trial identifier and registry name. If not yet registered, name of intended registry (Page 2, lines 67)                                                                                                                                                                                                     |
|                                   | 2b      | All items from the World Health Organization Trial Registration Data Set (Yes, throughout)                                                                                                                                                                                                                  |
| Protocol version                  | 3       | Date and version identifier (page 16, line 494)                                                                                                                                                                                                                                                             |
| Funding                           | 4       | Sources and types of financial, material, and other support (page 16, line 506 and page 16, lines 511-513)                                                                                                                                                                                                  |
| Roles and responsibilities        | 5a      | Names, affiliations, and roles of protocol contributors (page 1 and 15)                                                                                                                                                                                                                                     |
|                                   | 5b      | Name and contact information for the trial sponsor (page 16, line 488)                                                                                                                                                                                                                                      |
|                                   | 5c      | Role of study sponsor and funders, if any, in study design; collection, management, analysis, and interpretation of data; writing of the report; and the decision to submit the report for publication, including whether they will have ultimate authority over any of these activities (page 16, 506-509) |
|                                   | 5d      | Composition, roles, and responsibilities of the coordinating centre, steering committee, endpoint adjudication committee, data management team, and other individuals or groups overseeing the trial, if applicable (see Item 21a for data monitoring committee) N/A                                        |
| <b>Introduction</b>               |         |                                                                                                                                                                                                                                                                                                             |
| Background and rationale          | 6a      | Description of research question and justification for undertaking the trial, including summary of relevant studies (published and unpublished) examining benefits and harms for each intervention (Introduction, page 3)                                                                                   |
|                                   | 6b      | Explanation for choice of comparators (Introduction, page 3)                                                                                                                                                                                                                                                |
| Objectives                        | 7       | Specific objectives or hypotheses (Page 4)                                                                                                                                                                                                                                                                  |



|    |                                                           |     |                                                                                                                                                                                                                                                                                                                                                                                                         |
|----|-----------------------------------------------------------|-----|---------------------------------------------------------------------------------------------------------------------------------------------------------------------------------------------------------------------------------------------------------------------------------------------------------------------------------------------------------------------------------------------------------|
| 1  |                                                           |     |                                                                                                                                                                                                                                                                                                                                                                                                         |
| 2  | Trial design                                              | 8   | Description of trial design including type of trial (eg, parallel group, crossover, factorial, single group), allocation ratio, and framework (eg, superiority, equivalence, noninferiority, exploratory) (Page 5)                                                                                                                                                                                      |
| 3  |                                                           |     |                                                                                                                                                                                                                                                                                                                                                                                                         |
| 4  |                                                           |     |                                                                                                                                                                                                                                                                                                                                                                                                         |
| 5  |                                                           |     |                                                                                                                                                                                                                                                                                                                                                                                                         |
| 6  |                                                           |     |                                                                                                                                                                                                                                                                                                                                                                                                         |
| 7  |                                                           |     |                                                                                                                                                                                                                                                                                                                                                                                                         |
| 8  | <b>Methods: Participants, interventions, and outcomes</b> |     |                                                                                                                                                                                                                                                                                                                                                                                                         |
| 9  |                                                           |     |                                                                                                                                                                                                                                                                                                                                                                                                         |
| 10 | Study setting                                             | 9   | Description of study settings (eg, community clinic, academic hospital) and list of countries where data will be collected. Reference to where list of study sites can be obtained (Page 5, line 141-143)                                                                                                                                                                                               |
| 11 |                                                           |     |                                                                                                                                                                                                                                                                                                                                                                                                         |
| 12 |                                                           |     |                                                                                                                                                                                                                                                                                                                                                                                                         |
| 13 |                                                           |     |                                                                                                                                                                                                                                                                                                                                                                                                         |
| 14 | Eligibility criteria                                      | 10  | Inclusion and exclusion criteria for participants. If applicable, eligibility criteria for study centres and individuals who will perform the interventions (eg, surgeons, psychotherapists) (Table 1)                                                                                                                                                                                                  |
| 15 |                                                           |     |                                                                                                                                                                                                                                                                                                                                                                                                         |
| 16 |                                                           |     |                                                                                                                                                                                                                                                                                                                                                                                                         |
| 17 |                                                           |     |                                                                                                                                                                                                                                                                                                                                                                                                         |
| 18 |                                                           |     |                                                                                                                                                                                                                                                                                                                                                                                                         |
| 19 | Interventions                                             | 11a | Interventions for each group with sufficient detail to allow replication, including how and when they will be administered (Page 5 and 6)                                                                                                                                                                                                                                                               |
| 20 |                                                           |     |                                                                                                                                                                                                                                                                                                                                                                                                         |
| 21 |                                                           |     |                                                                                                                                                                                                                                                                                                                                                                                                         |
| 22 |                                                           | 11b | Criteria for discontinuing or modifying allocated interventions for a given trial participant (eg, drug dose change in response to harms, participant request, or improving/worsening disease) (Page 6, lines 176-178)                                                                                                                                                                                  |
| 23 |                                                           |     |                                                                                                                                                                                                                                                                                                                                                                                                         |
| 24 |                                                           |     |                                                                                                                                                                                                                                                                                                                                                                                                         |
| 25 |                                                           |     |                                                                                                                                                                                                                                                                                                                                                                                                         |
| 26 |                                                           |     |                                                                                                                                                                                                                                                                                                                                                                                                         |
| 27 |                                                           |     |                                                                                                                                                                                                                                                                                                                                                                                                         |
| 28 |                                                           | 11c | Strategies to improve adherence to intervention protocols, and any procedures for monitoring adherence (eg, drug tablet return, laboratory tests) (Page 10, lines 323-327)                                                                                                                                                                                                                              |
| 29 |                                                           |     |                                                                                                                                                                                                                                                                                                                                                                                                         |
| 30 |                                                           |     |                                                                                                                                                                                                                                                                                                                                                                                                         |
| 31 |                                                           |     |                                                                                                                                                                                                                                                                                                                                                                                                         |
| 32 |                                                           | 11d | Relevant concomitant care and interventions that are permitted or prohibited during the trial (Page 5, line 164)                                                                                                                                                                                                                                                                                        |
| 33 |                                                           |     |                                                                                                                                                                                                                                                                                                                                                                                                         |
| 34 |                                                           |     |                                                                                                                                                                                                                                                                                                                                                                                                         |
| 35 | Outcomes                                                  | 12  | Primary, secondary, and other outcomes, including the specific measurement variable (eg, systolic blood pressure), analysis metric (eg, change from baseline, final value, time to event), method of aggregation (eg, median, proportion), and time point for each outcome. Explanation of the clinical relevance of chosen efficacy and harm outcomes is strongly recommended (Study timeline, page 7) |
| 36 |                                                           |     |                                                                                                                                                                                                                                                                                                                                                                                                         |
| 37 |                                                           |     |                                                                                                                                                                                                                                                                                                                                                                                                         |
| 38 |                                                           |     |                                                                                                                                                                                                                                                                                                                                                                                                         |
| 39 |                                                           |     |                                                                                                                                                                                                                                                                                                                                                                                                         |
| 40 |                                                           |     |                                                                                                                                                                                                                                                                                                                                                                                                         |
| 41 |                                                           |     |                                                                                                                                                                                                                                                                                                                                                                                                         |
| 42 |                                                           |     |                                                                                                                                                                                                                                                                                                                                                                                                         |
| 43 | Participant timeline                                      | 13  | Time schedule of enrolment, interventions (including any run-ins and washouts), assessments, and visits for participants. A schematic diagram is highly recommended (see Figure) (Figure 1)                                                                                                                                                                                                             |
| 44 |                                                           |     |                                                                                                                                                                                                                                                                                                                                                                                                         |
| 45 |                                                           |     |                                                                                                                                                                                                                                                                                                                                                                                                         |
| 46 |                                                           |     |                                                                                                                                                                                                                                                                                                                                                                                                         |
| 47 |                                                           |     |                                                                                                                                                                                                                                                                                                                                                                                                         |
| 48 | Sample size                                               | 14  | Estimated number of participants needed to achieve study objectives and how it was determined, including clinical and statistical assumptions supporting any sample size calculations (Page 11, lines 346-348)                                                                                                                                                                                          |
| 49 |                                                           |     |                                                                                                                                                                                                                                                                                                                                                                                                         |
| 50 |                                                           |     |                                                                                                                                                                                                                                                                                                                                                                                                         |
| 51 |                                                           |     |                                                                                                                                                                                                                                                                                                                                                                                                         |
| 52 |                                                           |     |                                                                                                                                                                                                                                                                                                                                                                                                         |
| 53 |                                                           |     |                                                                                                                                                                                                                                                                                                                                                                                                         |
| 54 | Recruitment                                               | 15  | Strategies for achieving adequate participant enrolment to reach target sample size (Page 5, 140+)                                                                                                                                                                                                                                                                                                      |
| 55 |                                                           |     |                                                                                                                                                                                                                                                                                                                                                                                                         |
| 56 |                                                           |     |                                                                                                                                                                                                                                                                                                                                                                                                         |

### Methods: Assignment of interventions (for controlled trials)

Allocation:

1  
2 Sequence generation 16a Method of generating the allocation sequence (eg, computer-generated random numbers), and list of any factors for stratification. To reduce predictability of a random sequence, details of any planned restriction (eg, blocking) should be provided in a separate document that is unavailable to those who enrol participants or assign interventions (Page 5, 154-159)

10 Allocation concealment mechanism 16b Mechanism of implementing the allocation sequence (eg, central telephone; sequentially numbered, opaque, sealed envelopes), describing any steps to conceal the sequence until interventions are assigned (Page 5, 154-159)

15 Implementation 16c Who will generate the allocation sequence, who will enrol participants, and who will assign participants to interventions (Page 5, 158)

20 Blinding (masking) 17a Who will be blinded after assignment to interventions (eg, trial participants, care providers, outcome assessors, data analysts), and how N/A

25 17b If blinded, circumstances under which unblinding is permissible, and procedure for revealing a participant's allocated intervention during the trial N/A

### 29 **Methods: Data collection, management, and analysis**

31 Data collection methods 18a Plans for assessment and collection of outcome, baseline, and other trial data, including any related processes to promote data quality (eg, duplicate measurements, training of assessors) and a description of study instruments (eg, questionnaires, laboratory tests) along with their reliability and validity, if known. Reference to where data collection forms can be found, if not in the protocol (Page 7-11)

39 18b Plans to promote participant retention and complete follow-up, including list of any outcome data to be collected for participants who discontinue or deviate from intervention protocols (Page 11)

44 Data management 19 Plans for data entry, coding, security, and storage, including any related processes to promote data quality (eg, double data entry; range checks for data values). Reference to where details of data management procedures can be found, if not in the protocol (Page 11, lines 349-354)

52 Statistical methods 20a Statistical methods for analysing primary and secondary outcomes. Reference to where other details of the statistical analysis plan can be found, if not in the protocol (Page 11 and 12)

56 20b Methods for any additional analyses (eg, subgroup and adjusted analyses) N/A

1  
2 20c Definition of analysis population relating to protocol non-adherence  
3 (eg, as randomised analysis), and any statistical methods to handle  
4 missing data (eg, multiple imputation) (Page 12)  
5

## 6 **Methods: Monitoring**

7  
8 Data monitoring 21a Composition of data monitoring committee (DMC) or Data and Safety  
9 Monitoring Board (DCMB); summary of its role and reporting  
10 structure; statement of whether it is independent from the sponsor  
11 and competing interests; and reference to where further details about  
12 its charter can be found, if not in the protocol. Alternatively, an  
13 explanation of why a DMC is not needed  
14  
15

16  
17 A DSMB is indicated, from a practical perspective in the following  
18 circumstances:

- 19  
20  
21 1. If the trial is intended to provide definitive information about  
22 effectiveness and/or safety of a medical or bio-behavioral intervention  
23 2. If there are prior data to suggest that the intervention being studied has  
24 the potential to induce potentially unacceptable toxicity  
25 3. If the trial is evaluating mortality or another major endpoint, such that  
26 inferiority of one treatment arm has safety as well as effectiveness  
27 implications  
28 4. If it would ethically be important for the trial to stop early if the primary  
29 question addressed has been definitively answered, even if secondary  
30 questions or complete safety information were not yet fully addressed  
31

32  
33 The ECSERT study does not meet any of these criteria as a pilot/feasibility  
34 study

35 21b Description of any interim analyses and stopping guidelines,  
36 including who will have access to these interim results and make the  
37 final decision to terminate the trial N/A  
38

39  
40 Harms 22 Plans for collecting, assessing, reporting, and managing solicited and  
41 spontaneously reported adverse events and other unintended effects  
42 of trial interventions or trial conduct (Page 12, safety reporting)  
43

44 Auditing 23 Frequency and procedures for auditing trial conduct, if any, and  
45 whether the process will be independent from investigators and the  
46 sponsor N/A aside from usual sponsor audits  
47  
48

## 49 **Ethics and dissemination**

50  
51 Research ethics 24 Plans for seeking research ethics committee/institutional review  
52 approval board (REC/IRB) approval (Page 16, ethical issues)  
53

54 Protocol 25 Plans for communicating important protocol modifications (eg,  
55 amendments changes to eligibility criteria, outcomes, analyses) to relevant parties  
56 (eg, investigators, REC/IRBs, trial participants, trial registries,  
57 journals, regulators) (Page 16, ethical issues)  
58  
59  
60

|    |                   |     |                                                                           |
|----|-------------------|-----|---------------------------------------------------------------------------|
| 1  |                   |     |                                                                           |
| 2  | Consent or        | 26a | Who will obtain informed consent or assent from potential trial           |
| 3  | assent            |     | participants or authorised surrogates, and how (see Item 32) (page 5)     |
| 4  |                   |     |                                                                           |
| 5  |                   | 26b | Additional consent provisions for collection and use of participant       |
| 6  |                   |     | data and biological specimens in ancillary studies, if applicable         |
| 7  |                   |     | (consent form)                                                            |
| 8  |                   |     |                                                                           |
| 9  | Confidentiality   | 27  | How personal information about potential and enrolled participants        |
| 10 |                   |     | will be collected, shared, and maintained in order to protect             |
| 11 |                   |     | confidentiality before, during, and after the trial (Page 11)             |
| 12 |                   |     |                                                                           |
| 13 | Declaration of    | 28  | Financial and other competing interests for principal investigators for   |
| 14 | interests         |     | the overall trial and each study site (Page 16, line 515)                 |
| 15 |                   |     |                                                                           |
| 16 | Access to data    | 29  | Statement of who will have access to the final trial dataset, and         |
| 17 |                   |     | disclosure of contractual agreements that limit such access for           |
| 18 |                   |     | investigators (Page 17, availability of data)                             |
| 19 |                   |     |                                                                           |
| 20 |                   |     |                                                                           |
| 21 | Ancillary and     | 30  | Provisions, if any, for ancillary and post-trial care, and for            |
| 22 | post-trial care   |     | compensation to those who suffer harm from trial participation N/A        |
| 23 |                   |     |                                                                           |
| 24 | Dissemination     | 31a | Plans for investigators and sponsor to communicate trial results to       |
| 25 | policy            |     | participants, healthcare professionals, the public, and other relevant    |
| 26 |                   |     | groups (eg, via publication, reporting in results databases, or other     |
| 27 |                   |     | data sharing arrangements), including any publication restrictions        |
| 28 |                   |     | (Page 17, availability of data)                                           |
| 29 |                   |     |                                                                           |
| 30 |                   |     |                                                                           |
| 31 |                   |     |                                                                           |
| 32 |                   | 31b | Authorship eligibility guidelines and any intended use of professional    |
| 33 |                   |     | writers (Page 17, availability of data)                                   |
| 34 |                   |     |                                                                           |
| 35 |                   | 31c | Plans, if any, for granting public access to the full protocol,           |
| 36 |                   |     | participant-level dataset, and statistical code (Page 17, availability of |
| 37 |                   |     | data)                                                                     |
| 38 |                   |     |                                                                           |
| 39 |                   |     |                                                                           |
| 40 | <b>Appendices</b> |     |                                                                           |
| 41 |                   |     |                                                                           |
| 42 | Informed consent  | 32  | Model consent form and other related documentation given to               |
| 43 | materials         |     | participants and authorised surrogates Yes                                |
| 44 |                   |     |                                                                           |
| 45 | Biological        | 33  | Plans for collection, laboratory evaluation, and storage of biological    |
| 46 | specimens         |     | specimens for genetic or molecular analysis in the current trial and      |
| 47 |                   |     | for future use in ancillary studies, if applicable (Page 10)              |
| 48 |                   |     |                                                                           |

\*It is strongly recommended that this checklist be read in conjunction with the SPIRIT 2013 Explanation & Elaboration for important clarification on the items. Amendments to the protocol should be tracked and dated. The SPIRIT checklist is copyrighted by the SPIRIT Group under the Creative Commons "[Attribution-NonCommercial-NoDerivs 3.0 Unported](https://creativecommons.org/licenses/by-nc-nd/3.0/)" license.

# BMJ Open

## A pilot randomised controlled trial of a structured, home-based exercise program on cardiovascular structure and function in kidney transplant recipients: The ECSERT study design and methods

|                               |                                                                                                                                                                                                                                                                                                                                                                                                                                                                                                                                                                                                                                                                                                                                                                                                                                                                                                                                                                                                                                                                                                                                                                                                                                                                                                                                                                                                                                                                                                                                                                                                                                                                                                                                                                                                                                                                                                                                                                                                           |
|-------------------------------|-----------------------------------------------------------------------------------------------------------------------------------------------------------------------------------------------------------------------------------------------------------------------------------------------------------------------------------------------------------------------------------------------------------------------------------------------------------------------------------------------------------------------------------------------------------------------------------------------------------------------------------------------------------------------------------------------------------------------------------------------------------------------------------------------------------------------------------------------------------------------------------------------------------------------------------------------------------------------------------------------------------------------------------------------------------------------------------------------------------------------------------------------------------------------------------------------------------------------------------------------------------------------------------------------------------------------------------------------------------------------------------------------------------------------------------------------------------------------------------------------------------------------------------------------------------------------------------------------------------------------------------------------------------------------------------------------------------------------------------------------------------------------------------------------------------------------------------------------------------------------------------------------------------------------------------------------------------------------------------------------------------|
| Journal:                      | <i>BMJ Open</i>                                                                                                                                                                                                                                                                                                                                                                                                                                                                                                                                                                                                                                                                                                                                                                                                                                                                                                                                                                                                                                                                                                                                                                                                                                                                                                                                                                                                                                                                                                                                                                                                                                                                                                                                                                                                                                                                                                                                                                                           |
| Manuscript ID                 | bmjopen-2020-046945.R1                                                                                                                                                                                                                                                                                                                                                                                                                                                                                                                                                                                                                                                                                                                                                                                                                                                                                                                                                                                                                                                                                                                                                                                                                                                                                                                                                                                                                                                                                                                                                                                                                                                                                                                                                                                                                                                                                                                                                                                    |
| Article Type:                 | Protocol                                                                                                                                                                                                                                                                                                                                                                                                                                                                                                                                                                                                                                                                                                                                                                                                                                                                                                                                                                                                                                                                                                                                                                                                                                                                                                                                                                                                                                                                                                                                                                                                                                                                                                                                                                                                                                                                                                                                                                                                  |
| Date Submitted by the Author: | 21-Apr-2021                                                                                                                                                                                                                                                                                                                                                                                                                                                                                                                                                                                                                                                                                                                                                                                                                                                                                                                                                                                                                                                                                                                                                                                                                                                                                                                                                                                                                                                                                                                                                                                                                                                                                                                                                                                                                                                                                                                                                                                               |
| Complete List of Authors:     | <p>Billany, Roseanne; University of Leicester, Department of Cardiovascular Sciences; University Hospitals of Leicester NHS Trust, John Walls Renal Unit</p> <p>Vadaszy, Noemi; University of Leicester, Department of Health Sciences Bishop , Nicolette ; Loughborough University, School of Sport, Exercise and Health Sciences</p> <p>Wilkinson, Thomas ; University of Leicester, Department of Health Sciences</p> <p>Adenwalla, Sherna; University of Leicester, Department of Cardiovascular Sciences; University Hospitals of Leicester NHS Trust, John Walls Renal Unit</p> <p>Robinson, Katherine; University of Leicester, Department of Cardiovascular Sciences</p> <p>Croker , Kathryn; University Hospitals of Leicester NHS Trust, John Walls Renal Unit</p> <p>Brady, Emer; University of Leicester, Department of Cardiovascular Sciences</p> <p>Wormleighton, Joanne; University Hospitals of Leicester NHS Trust, Department of Radiology</p> <p>Parke, Kelly; University of Leicester, Department of Cardiovascular Sciences; University Hospitals of Leicester NHS Trust, Department of Radiology</p> <p>Cooper, Nicola; University of Leicester, Department of Health Sciences</p> <p>Webster, Angela; The University of Sydney, School of Public Health; Westmead Hospital, Centre for Renal and Transplant Research</p> <p>Barratt, Jonathan; University of Leicester, Department of Cardiovascular Sciences; University Hospitals of Leicester NHS Trust, John Walls Renal Unit</p> <p>McCann, Gerry; University of Leicester, Department of Cardiovascular Sciences</p> <p>Burton, James; University of Leicester, Department of Cardiovascular Sciences; University Hospitals of Leicester NHS Trust, John Walls Renal Unit</p> <p>Smith, Alice; University of Leicester, Department of Health Sciences</p> <p>Graham-Brown, Matthew ; University of Leicester, Department of Cardiovascular Sciences; University Hospitals of Leicester NHS Trust, John Walls Renal Unit</p> |

1  
2  
3  
4  
5  
6  
7  
8  
9  
10  
11  
12  
13  
14  
15  
16  
17  
18  
19  
20  
21  
22  
23  
24  
25  
26  
27  
28  
29  
30  
31  
32  
33  
34  
35  
36  
37  
38  
39  
40  
41  
42  
43  
44  
45  
46  
47  
48  
49  
50  
51  
52  
53  
54  
55  
56  
57  
58  
59  
60

|                                   |                                                               |
|-----------------------------------|---------------------------------------------------------------|
| <b>Primary Subject Heading:</b>   | Renal medicine                                                |
| <b>Secondary Subject Heading:</b> | Rehabilitation medicine, Cardiovascular medicine              |
| <b>Keywords:</b>                  | Renal transplantation < NEPHROLOGY, CARDIOLOGY, PUBLIC HEALTH |
|                                   |                                                               |

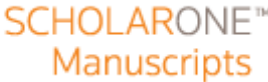



I, the Submitting Author has the right to grant and does grant on behalf of all authors of the Work (as defined in the below author licence), an exclusive licence and/or a non-exclusive licence for contributions from authors who are: i) UK Crown employees; ii) where BMJ has agreed a CC-BY licence shall apply, and/or iii) in accordance with the terms applicable for US Federal Government officers or employees acting as part of their official duties; on a worldwide, perpetual, irrevocable, royalty-free basis to BMJ Publishing Group Ltd ("BMJ") its licensees and where the relevant Journal is co-owned by BMJ to the co-owners of the Journal, to publish the Work in this journal and any other BMJ products and to exploit all rights, as set out in our [licence](#).

The Submitting Author accepts and understands that any supply made under these terms is made by BMJ to the Submitting Author unless you are acting as an employee on behalf of your employer or a postgraduate student of an affiliated institution which is paying any applicable article publishing charge ("APC") for Open Access articles. Where the Submitting Author wishes to make the Work available on an Open Access basis (and intends to pay the relevant APC), the terms of reuse of such Open Access shall be governed by a Creative Commons licence – details of these licences and which [Creative Commons](#) licence will apply to this Work are set out in our licence referred to above.

Other than as permitted in any relevant BMJ Author's Self Archiving Policies, I confirm this Work has not been accepted for publication elsewhere, is not being considered for publication elsewhere and does not duplicate material already published. I confirm all authors consent to publication of this Work and authorise the granting of this licence.

1  
2  
3 1 **A pilot randomised controlled trial of a structured, home-based exercise program on**  
4  
5 2 **cardiovascular structure and function in kidney transplant recipients: The ECSERT study**  
6  
7 3 **design and methods**  
8  
9 4

10 5 Roseanne E Billany<sup>1,2</sup>, Noemi Vadaszy<sup>3</sup>, Nicolette C Bishop<sup>4</sup>, Thomas J Wilkinson<sup>3</sup>, Sherna Adenwalla<sup>1,2</sup>,  
11 6 Katherine A Robinson<sup>1</sup>, Kathryn Croker<sup>2</sup>, Emer M Brady<sup>1</sup>, Joanne Wormleighton<sup>5</sup>, Kelly Parke<sup>1,5</sup>, Nicola  
12 7 J Cooper<sup>3</sup>, Angela C Webster<sup>6</sup>, Jonathan Barratt<sup>1,2</sup>, Gerry P McCann<sup>1</sup>, James O Burton<sup>1,2,5</sup>, Alice C Smith<sup>3</sup>,  
13 8 Matthew PM Graham-Brown<sup>1,2</sup>  
14  
15  
16  
17 9

18  
19 10 <sup>1</sup> Department of Cardiovascular Sciences, University of Leicester, Leicester, UK

20 11 <sup>2</sup> John Walls Renal Unit, University Hospitals of Leicester NHS Trust, Leicester, UK

21 12 <sup>3</sup> Department of Health Sciences, University of Leicester, Leicester, UK

22 13 <sup>4</sup> School of Sport, Exercise and Health Sciences, Loughborough University, Loughborough, UK

23 14 <sup>5</sup> Department of Radiology, University Hospitals of Leicester NHS Trust, Leicester, UK

24 15 <sup>6</sup> Sydney School of Public Health, University of Sydney, Sydney, NSW, Australia; Centre for Renal and  
25 16 Transplant Research, Westmead Hospital, Sydney, NSW, Australia.  
26  
27  
28  
29  
30  
31  
32  
33

34 19 **Corresponding author:**

35 20 Dr Matthew Graham-Brown

36 21 Department of Cardiovascular Sciences

37 22 University of Leicester

38 23 Leicester

39 24 United Kingdom

40 25 mgb23@leicester.ac.uk  
41  
42  
43  
44  
45  
46  
47  
48  
49  
50  
51  
52  
53  
54  
55  
56  
57  
58  
59  
60

27 **Keywords:** kidney transplantation, home-based exercise, cardiovascular disease, feasibility, cardiac  
28 MRI

30 **Abstract:** 300

31 **Word count:** 4402



1  
2  
3 35 **ABSTRACT**  
4  
5 36

6 37 **Background:** Cardiovascular disease (CVD) is a major cause of morbidity and mortality in kidney  
7  
8 38 transplant recipients (KTRs). CVD risk scores underestimate risk in this population as CVD is driven by  
9  
10 39 clustering of traditional and non-traditional risk factors, which lead to prognostic pathological changes  
11  
12 40 in cardiovascular structure and function. Whilst exercise may mitigate CVD in this population,  
13  
14 41 evidence is limited, and physical activity levels and patient activation towards exercise and self-  
15  
16 42 management are low. This pilot study will assess the feasibility of delivering a structured, home-based  
17  
18 43 exercise intervention in a population of KTRs at increased cardiometabolic risk and evaluate the  
19  
20 44 putative effects on cardiovascular structural and functional changes, cardiorespiratory fitness, quality  
21  
22 45 of life, patient activation, healthcare utilisation, and engagement with the prescribed exercise  
23  
24 46 program.  
25

26 47  
27 48 **Methods and analysis:** Fifty KTRs will be randomised 1:1 to: (1) the intervention; a 12-week home-  
28  
29 49 based combined resistance and aerobic exercise intervention or; (2) the control; usual care.  
30  
31 50 Intervention participants will have one introductory session for instruction and practice of the  
32  
33 51 recommended exercises prior to receiving an exercise diary, dumbbells, resistance bands, and access  
34  
35 52 to instructional videos. The study will evaluate the feasibility of recruitment, randomisation, retention,  
36  
37 53 assessment procedures, and the intervention implementation. Outcomes, to be assessed prior to  
38  
39 54 randomisation and post-intervention, include: cardiac structure and function with stress-perfusion  
40  
41 55 cardiac magnetic resonance imaging, cardiorespiratory fitness, physical function, blood biomarkers of  
42  
43 56 cardiometabolic health, quality of life, and patient activation. These data will be used to inform the  
44  
45 57 power calculations for future definitive trials.  
46  
47 58

48 59 **Ethics and dissemination:** The protocol was reviewed and given favourable opinion by the East  
49  
50 60 Midlands-Nottingham 2 research ethics committee (ref 19/EM/0209; 14/10/2019). Results will be  
51  
52 61 published in peer-reviewed academic journals and will be disseminated to the patient and public  
53  
54 62 community via social media, newsletter articles, and presentations at conferences.  
55  
56 63

57 64 **Trial registration number:** NCT04123951; prospectively registered.  
58  
59 65  
60 66

1  
2  
3 67 **ARTICLE SUMMARY**  
4

5 68 **Strengths and limitations of this study:**  
6  
7 69

- 8 70
- 9 71 • Data on the effects of exercise interventions on the cardiac structural and functional aspects  
10 72 of CVD in this population are lacking and baseline values of multiparametric cardiac magnetic  
11 73 resonance imaging in KTRs are previously undefined.
  - 12 74 • This study uses a novel home-based exercise intervention with the potential to translate into  
13 75 a widespread, low-resource intervention compared to in-centre, supervised interventions  
14 76 that are costly and labour intensive.
  - 15 77 • As it can be difficult to ensure control groups are not influenced to change their lifestyle as a  
16 78 result of being part of the study; control participants will be offered the intervention after  
17 79 completion of the study.
  - 18 80 • This study will provide quantitative and qualitative feasibility and pilot data to inform a  
19 81 definitive randomised controlled trial that will explore longer-term engendered lifestyle  
20 82 change in this population in response to a complex, home-based, lifestyle intervention.
  - 21 83 • Secondary outcome analysis will identify the putative cardiometabolic and muscular effects  
22 84 of the intervention, although these results would need confirming in adequately powered  
23 85 studies due to the small sample size of this pilot study.
- 24  
25  
26  
27  
28  
29  
30  
31  
32  
33  
34  
35  
36  
37  
38  
39  
40  
41  
42  
43  
44  
45  
46  
47  
48  
49  
50  
51  
52  
53  
54  
55  
56  
57  
58  
59  
60

## 86 BACKGROUND

87 Kidney transplantation is the preferred modality of renal replacement therapy for patients with end  
88 stage kidney disease (ESKD). Although kidney transplantation confers a significant survival advantage  
89 over remaining on dialysis,<sup>1</sup> cardiovascular disease (CVD) is a leading cause of morbidity, mortality,  
90 and graft loss.<sup>2-4</sup> Since 2015, mortality rates attributed to CVD have been rising.<sup>4</sup> Cardiovascular  
91 disease in kidney transplant recipients (KTRs) associates with traditional cardiometabolic risk factors,<sup>3</sup>  
92 <sup>5 6</sup> which drive classical atheromatous coronary artery disease, and non-traditional risk factors  
93 resulting in pathological changes in cardiovascular structure and function that associate with  
94 mortality.<sup>7</sup> Immunosuppressive agents are well known to drive traditional<sup>3</sup> and non-traditional  
95 cardiometabolic risk factors.<sup>8 9</sup> Non-traditional cardiometabolic risk factors, including endothelial  
96 dysfunction, systemic inflammation, acute rejection, anaemia, and deranged bone-mineral  
97 metabolism,<sup>10-12</sup> are of at least equal importance in the pathogenesis of CVD in KTRs.<sup>7</sup> This is further  
98 illustrated by the fact that traditional CVD risk-stratification tools dramatically underestimate  
99 cardiovascular risk in patients with chronic kidney disease (CKD);<sup>11-13-15</sup> coronary revascularisation does  
100 not improve outcomes for KTRs as it does in the general population<sup>12</sup> and cardiac events are more  
101 likely to be fatal in KTRs.<sup>16</sup>

102 Chronic kidney disease-related cardiomyopathy, which has been termed “Uremic Cardiomyopathy”,  
103 is characterised by stereotypical changes in the cardiovascular structure and function of the heart such  
104 as left ventricular hypertrophy (LVH), left ventricular dilatation, left ventricular systolic dysfunction,<sup>17</sup>  
105 myocardial fibrosis,<sup>18</sup> and aortic stiffness<sup>19</sup>; all of which relate to poor cardiovascular outcomes.<sup>20 21</sup>  
106 Although structural and functional improvements of the heart and vessels have been seen post-  
107 transplantation in some studies,<sup>22</sup> others have shown no regression<sup>23</sup> and parameters such as LVH are  
108 independent factors for cardiac failure and mortality in KTRs.<sup>15</sup> Cardiac magnetic resonance imaging  
109 (CMR) is the gold-standard for assessment of ventricular structure and function and we have shown  
110 methods for assessment of tissue characterisation, aortopathy, and sub-clinical systolic and diastolic  
111 function to be reproducible in patients with kidney disease,<sup>24-26</sup> making CMR the ideal imaging  
112 modality for assessing multiple aspects of prognostically relevant measures of CVD in clinical studies.  
113 Numerous epidemiological studies have observed the association between low levels of physical  
114 activity and increased prevalence of CVD risk factors,<sup>27-29</sup> and an inverse relationship between physical  
115 activity and all-cause and CVD mortality.<sup>30 31</sup> Physical activity levels in KTRs are lower than the general  
116 population,<sup>32 33</sup> with only 27% classified as meeting the UK national recommended physical activity  
117 levels.<sup>34</sup> Whilst physical activity levels improve in the year following transplantation, they plateau after  
118 one-year.<sup>33</sup> In the general population, lifestyle changes that increase physical activity through  
119 structured exercise lower mortality.<sup>35 36</sup> Despite this evidence, there is a lack of rigorous research into

1  
2  
3 120 the role of increased physical activity in mitigating cardiovascular risk in KTRs.<sup>37</sup> Recent consensus  
4 121 recommendations from experts and stakeholders highlighted the need for a priority research agenda  
5 122 in exercise for solid organ transplant recipients (SOTRs) to improve cardiovascular outcomes in this  
6 123 patient population.<sup>38</sup> Whilst supervised exercise interventions in KTRs improve cardiorespiratory  
7 124 fitness and a variety of traditional and non-traditional risk factors for CVD, including metabolic  
8 125 profile,<sup>39-41</sup> strength,<sup>42</sup> vascular stiffening,<sup>40</sup> weight,<sup>43</sup> and inflammation,<sup>44</sup> they are not realistically  
9 126 deliverable in the current financial climate and have not translated to clinical practice. Furthermore,  
10 127 exercise habits following in-centre supervised programs are not maintained<sup>45-47</sup> which can be  
11 128 potentially attributed to low levels of patient activation (a measure of a person's skills, confidence,  
12 129 and knowledge to manage their own health) and a failure for such programs to engender sustained  
13 130 lifestyle changes.<sup>48 49</sup> Home-based exercise training programs have been shown to be deliverable in  
14 131 patients on dialysis and patients undergoing cardiac rehabilitation,<sup>50-53</sup> but the effectiveness and  
15 132 deliverability of home-based exercise interventions are largely untested in KTRs. It cannot be assumed  
16 133 that such programs will be acceptable to KTRs, whose home-lives, social and occupational  
17 134 circumstances are significantly different to dialysis and cardiac patients. Many KTRs have had enforced  
18 135 sedentary lifestyles prior to transplantation as dialysis patients and their goals for rehabilitation as  
19 136 well as the disease processes at work may be different.<sup>54 55</sup>

### 137 **Objectives**

138 The aims of this study are to evaluate the impact of a 12-week, home-based exercise intervention in  
139 KTRs with increased cardiometabolic risk, specifically addressing:

- 140 1. The deliverability and feasibility of the home-based exercise intervention in KTRs, defining  
141 recruitment, retention, compliance, and adverse events;
- 142 2. Potential cardiovascular structural and functional parameters measured using stress-  
143 perfusion CMR;
- 144 3. Cardiorespiratory fitness and strength;
- 145 4. Biochemical markers of cardiometabolic health, body composition, physical function, and  
146 quality of life;
- 147 5. Patient activation and continued adherence to the prescribed home-based exercise program.

148 Two sub-studies will assess:

- 149 1. The acceptability of the intervention through qualitative semi-structured interviews post-  
150 intervention.
- 151 2. The differences between cardiorespiratory fitness in 'healthy controls' versus KTRs.

152

## 153 **METHODS AND ANALYSIS**

### 154 **ECSERT trial design**

155 This study is a prospective, randomised, open-label, blinded endpoint (PROBE) pilot study. The study  
156 flowchart is presented in Figure 1.

### 157 **Participant identification and recruitment**

158 Fifty KTRs with a stable kidney transplant of >1 year will be recruited from University Hospitals of  
159 Leicester NHS Trust (UHL) kidney transplant outpatient clinic lists. There are approximately 400-420  
160 KTRs registered in UHL kidney transplant outpatient clinics. Full lists of inclusion and exclusion criteria  
161 for KTRs are included in Table 1. Patients will be screened by a clinician for eligibility to enter the study.  
162 Eligible patients will be approached (via telephone, post, or during their routine clinical appointment)  
163 and will be provided with verbal and written study information and time to consider without further  
164 contact (at least 24 h). Additionally, eligible patients who have given prior consent to be contacted  
165 regarding research opportunities will be contacted via post. All patients will be given the opportunity  
166 to discuss the study in more detail and to consider their participation. Consent will be performed by  
167 the Chief Investigator (MBG) according to the rules of good clinical practice. Inclusion and exclusion  
168 criteria for healthy controls is included within Table 1.

### 169 **Randomisation**

170 Following baseline assessment, participants will be randomly allocated (1:1) to either; (1) a 12-week  
171 home-based combined resistance and aerobic exercise intervention (n=25) or; (2) control (n=25;  
172 receiving usual care). Randomisation will be blocked (using computer-generated random permuted  
173 blocks with allocation concealment; <https://www.sealedenvelope.com/simple-randomiser/v1/>) to  
174 ensure periodic balancing. The Clinical Trials Facilitator will perform the randomisation. Given the  
175 nature of the intervention, it is not possible for the participants to be blinded to their allocation.

### 176 **Intervention and comparator arms**

177 Intervention Group: 12-week home-based combined aerobic and resistance training

178 The 12-week, home-based, structured exercise program includes aerobic and resistance training (4-5  
179 sessions in total per week). Participants will be advised to complete a warm-up and cool-down prior  
180 to and following each session, respectively. Participants will continue to receive usual clinical care.

#### 181 *Aerobic component*

182 The aerobic component of the intervention will be walking, jogging, cycling, or similar, depending on  
183 resources available and participant preference. Participants will be asked to complete 2-3 sessions per  
184 week using a rating of perceived of exertion (RPE)<sup>56</sup> of 13-15 (somewhat hard) for 20-30 min. RPE will

1  
2  
3 185 be collected throughout cardiopulmonary exercise tests (CPET) and participants will be educated on  
4  
5 186 its use during the instructional session(s). RPE will be utilised rather than heart rate for two reasons:  
6  
7 187 (1) Many patients are on medication which impacts heart rate (e.g. beta-blockers). We therefore  
8  
9 188 cannot ascertain a true maximal heart rate from the exercise test in order for them to safely (and  
10  
11 189 reliably) monitor intensity this way without supervision. (2) This is a pragmatic decision based on the  
12  
13 190 potential for translation into low-cost future studies and clinical practice. However, should  
14  
15 191 participants in the trial already own a smart watch or heart rate monitor, we would not discourage  
16  
17 192 them from using it if they desire.

### 17 193 *Resistance component*

19 194 The resistance component of the exercise intervention will include a combination of 6-8 exercises per  
20  
21 195 session chosen by the participant from a pool of twelve exercises (to provide variety) targeting upper  
22  
23 196 and lower body and core muscle groups, using free weights and/or resistance bands. The chosen pool  
24  
25 197 of exercises include: squat, hip abduction, lunge, calf-raise, side-lunge, bicep-curl, bent-over row,  
26  
27 198 reverse-fly, lateral-raise, chest-press, side-bends, and standing trunk rotation. Each exercise has  
28  
29 199 modifications for different abilities and may be pragmatically adjusted or changed throughout the  
30  
31 200 study as required. These exercises were chosen based on their ability to be modified, their subjective  
32  
33 201 difficulty, and their safety when being performed by participants new to exercise in an unsupervised  
34  
35 202 environment. Participants will aim to complete 6-8 resistance exercises twice a week (but not on  
36  
37 203 consecutive days to allow appropriate recovery). Initially they will be advised to complete 1-2 sets of  
38  
39 204 10 repetitions (at approximately 60% of estimated 1 repetition maximum (RM)<sup>57</sup>), gradually increasing  
40  
41 205 to 3-6 sets of 10 repetitions over the study period with a minimum of 30 sec rest between sets. These  
42  
43 206 figures may be adjusted to accommodate different abilities and different rates of progression. Where  
44  
45 207 equipment is limited (e.g. participants reach the highest provided dumbbell weight), participants will  
46  
47 208 be advised to increase the number of sets performed. The load chosen was based on previous research  
48  
49 209 which suggests whilst heavier loads (>60% of 1RM) are favoured for increasing strength, the effect  
50  
51 210 size is still large for lighter loads (<60% of 1RM) and both are effective for increasing muscle size.<sup>58</sup> It  
52  
53 211 is important not to discourage inactive or inexperienced participants with very heavy loads.  
54  
55 212 Participants will be provided with an exercise diary which includes additional instructions, dumbbells  
56  
57 213 and resistance bands, and access to educational and instructional videos. Instructional videos will  
58  
59 214 include: the importance of an active and healthy lifestyle, the importance of warming up and cooling  
60  
215 down and how to do it, a reminder of how to use the RPE scale, demonstrations of each resistance  
216  
217 exercise, and information about the aerobic component (videos can be viewed here:  
218 [https://www.youtube.com/playlist?list=PLwbE3AF9Ej\\_VuI5uoiF-C9Cl8wrgKz5Nv](https://www.youtube.com/playlist?list=PLwbE3AF9Ej_VuI5uoiF-C9Cl8wrgKz5Nv)). Participants will  
receive a telephone call from a member of the research team every two weeks in order to discuss

219 progression of the exercise and address any issues that may arise. Participants will also be able to  
220 contact the research team at any time should they require and will continue to attend any scheduled  
221 clinic appointments and take prescribed medication as normal.

222 Control group: 'Usual care'

223 Participants in the control group will be asked to maintain their current lifestyle and exercise habits  
224 throughout the study. This includes continuing to attend any scheduled clinic appointments and taking  
225 prescribed medication as normal. As part of routine care, KTRs are recommended to take regular  
226 exercise and maintain a healthy lifestyle. This advice will be reiterated to patients in the control group  
227 to ensure the intervention is being appropriately compared to best-practice standard care.  
228 Participants will be asked to complete a 'control diary' to note any exercise, medication changes,  
229 illness, and other relevant information. Once control participants complete the post-intervention  
230 assessments, they will be offered the opportunity to complete the same intervention as the exercise  
231 group.

## 232 Study timeline

233 Baseline assessments

234 The ECSERT study timeline is shown in Figure 1. Baseline assessments described below will be carried  
235 out on the same day and in conjunction with routine clinical appointments to prevent additional  
236 travel.

### 237 *Collection of routine clinical information and cost-effectiveness*

238 Clinical information will be extracted from the medical notes including: age, gender, ethnicity, primary  
239 cause of kidney failure, transplant type, transplant vintage, dialysis duration, comorbidities,  
240 blood/urine results, current medication, and smoking habits. This information will be used to primarily  
241 capture cofounding variables and during analyses of differences and similarities between groups.

242 A questionnaire will be administered at baseline to capture the previous 3 months of self-reported  
243 healthcare utilisation including: inpatient and outpatient appointments, emergency care, community  
244 and primary care services, support services, and changes in medications. This will be compared to data  
245 gathered from healthcare records allowing validation of the questionnaire for future cost-  
246 effectiveness analyses.

### 247 *Cardiac stress MRI*

248 All participants will undergo a comprehensive adenosine-stress perfusion CMR scans at baseline and  
249 on study-completion. Participants will be scanned on a 3T platform (Skyra, Siemens Medical Imaging,  
250 Erlangen, Germany) with an 18-channel phased-array receiver coil. New-generation gadolinium-based

1  
2  
3 251 contrast agent with a licence for use in patients with an eGFR >30 ml/min/1.73 m<sup>2</sup> will be given for  
4  
5 252 perfusion and delayed enhancement imaging. Patients with an eGFR <40 ml/min/1.73 m<sup>2</sup> will undergo  
6  
7 253 non-contrast CMR scanning without gadolinium. Scans will quantitatively define:

- 8  
9 254 • Left and right-ventricular structure and function (left ventricular mass, left and right  
10  
11 255 ventricular volumes and ejection fractions);<sup>59</sup>  
12  
13 256 • Tissue-characterisation with native and post-contrast T1 mapping and delayed gadolinium  
14  
15 257 enhancement;<sup>60-62</sup>  
16  
17 258 • Myocardial systolic-strain and peak early-diastolic strain rate;<sup>26</sup>  
18  
19 259 • Quantitative perfusion imaging (coronary blood-flow to quantify coronary reserve and  
20  
21 260 ischaemia);<sup>63</sup>  
22  
23 261 • Aortic distensibility.<sup>24</sup>

#### 24 262 *Quadriceps MRI*

25 263 At the end of the CMR scan, participants will immediately undergo an MRI scan of the quadriceps  
26  
27 264 muscle in their right leg to assess muscle size (volume) as previously described<sup>64</sup>

#### 28 265 *Cardiopulmonary exercise test*

29  
30 266 A CPET utilising a standardised ramp protocol will be performed on a stationary electronically braked  
31  
32 267 cycle ergometer (Lode Excalibur Sport, Groningen, Netherlands) with increasing workload (1 watt (W)  
33  
34 268 every 4 sec (10-15 w/min)) ensuring volitional exhaustion within 12-15 min<sup>65</sup>. Participants will be  
35  
36 269 encouraged to cycle at a continuous cadence (~70 rpm). The highest oxygen uptake will be measured  
37  
38 270 (VO<sub>2peak</sub>) using a simultaneous gas analyser (Metalyser 3B CPX System, CORTEX, Germany) as true  
39  
40 271 maximal (plateau) VO<sub>2</sub> (VO<sub>2max</sub>) is less commonly achieved in deconditioned and/or clinical patients.  
41  
42 272 Test data will be considered usable if respiratory exchange ratio is ≥1.00 and RPE is ≥18. The test will  
43  
44 273 be in the presence of a cardiac nurse to confirm safety to commence exercise training. Blood pressure  
45  
46 274 will be assessed at baseline and every two minutes throughout the test. A continuous 12-lead  
47  
48 275 electrocardiogram (ECG) will be monitored throughout. A non-invasive monitor (Moxy, Fortiori Design  
49  
50 276 LLC., Minnesota, USA) will be worn on the quadriceps muscle which uses near infrared spectroscopy  
51  
52 277 (NIRS) to measure local oxygen saturation (SmO<sub>2</sub>) and total haemoglobin (THb) of the muscle.

#### 53 278 *Lower limb Strength and muscular endurance*

54 279 Isometric and isokinetic muscle (knee extension) strength, of the dominant leg, will be assessed using  
55  
56 280 a dynamometer (Biodex System 4, Biodex Medical Systems Inc., New York, USA). Peak isometric  
57  
58 281 strength (torque, Nm) will be assessed from three repetitions of maximum effort at 90° knee flexion  
59  
60 282 for ~3-5 sec with 60 sec rest. Isokinetic strength will be assessed at three speeds for one set of five



1  
2  
3 283 repetitions at each speed: 60°/sec, 90°/sec, and 120°/sec. Participants will perform a 'sit-to-stand-60'  
4  
5 284 (STS-60) test measuring how many sit-to-stand cycles can be performed over 60 sec.

6  
7 285 *Handgrip strength*

8  
9 286 Peak grip strength of the left and right hands will be assessed with a hand dynamometer (Jamar Plus+;  
10  
11 287 Sammons Preston, Bolingbrook, IL). Each hand will be alternatively tested for three attempts each and  
12  
13 288 the highest value on each hand will be recorded.

14  
15 289 *Gait speed*

16  
17 290 A 4 m walk test will be used to assess gait speed. Participants will be asked to walk 4 m at their 'usual  
18  
19 291 walking pace' for one practice and two, timed trials. The average score (m/sec) of the timed trials will  
20  
21 292 be recorded.

22  
23 293 *Functional mobility*

24  
25 294 The 'timed-up-and-go' test (TUAG) will be used to assess functional mobility.<sup>66 67</sup> The participant is  
26  
27 295 timed whilst rising from the seated position on a chair, walking 3 m, turning around, and returning to  
28  
29 296 a seated position.

30  
31 297 *Balance and postural stability*

32  
33 298 Postural stability and balance will be assessed using a previously reported method<sup>68</sup> with a FysioMeter  
34  
35 299 device (modified Nintendo Wii balance-board (Nintendo, Kyoto, Japan)) connected via Bluetooth to  
36  
37 300 software on a portable computer (FysioMeter ApS, Brønderslev, Denmark). Total centre of pressure  
38  
39 301 ellipse area (mm<sup>2</sup>) will be obtained.

40  
41 302 *Quadriceps ultrasound and myotonometry*

42  
43 303 Rectus femoris anatomical cross-sectional area will be measured from the right leg using B-mode 2D  
44  
45 304 ultrasonography (Hitachi EUB-6500; probe frequency, 7.5 MHz) under resting conditions with the  
46  
47 305 participant lying prone at a 45° as previously described.<sup>64</sup> Rectus femoris and vastus lateralis thickness,  
48  
49 306 subcutaneous fat thickness, and fibre pennation angles will be obtained. Measurements of the  
50  
51 307 viscoelastic properties of the soft tissue above the mid-point of the rectus femoris muscle will be  
52  
53 308 obtained using a myotonometry device (MyotonPro, Tallinn, Estonia).

54  
55 309 *Anthropometric measures*

56  
57 310 Anthropometric measures of height, body mass, and waist and hip circumference will be attained in  
58  
59 311 accordance with standard protocols.<sup>69</sup> Bioelectrical impedance analysis (BIA) performed on an InBody  
60  
312 analyser (InBody 370, Chicago, Illinois, USA) will be used to estimate body composition (eg. body fat  
313  
percentage, fat-free mass).<sup>70 71</sup>

1  
2  
3 314 *Survey pack*  
4

5 315 Participants will be provided with a survey pack containing the following questionnaires:  
6

- 7 316 (1) Integrated Palliative Outcome Scale (I-POS-Renal): a validated questionnaire measuring the  
8 presence and severity of disease related symptoms. The I-POS-Renal was developed based on  
9 317 the POS and IPOS palliative care surveys, but with the additional inclusion of symptoms  
10 318 common in CKD such as pruritus and restless legs.<sup>72</sup>  
11 319  
12 320 (2) 12-Item Short Form Health Survey (SF-12): a validated 12-item questionnaire used to assess  
13 generic health outcomes from the patient's perspective.<sup>73</sup>  
14 321  
15 322 (3) Functional Assessment of Chronic Illness Therapy-Fatigue (FACIT-F): a validated 13-item  
16 multidimensional scale that assesses fatigue over the past seven days using a 5-point Likert  
17 323 scale that covers physical fatigue, functional fatigue, emotional fatigue, and social  
18 324 consequences of fatigue with excellent internal consistency and test-retest reliability.<sup>74 75</sup>  
19 325  
20 326 (4) Pittsburgh Sleep Quality Index (PSQI): self-rated questionnaire which assesses sleep quality  
21 and disturbances over a 1-month time interval.<sup>76</sup>  
22 327  
23 328 (5) Patient Activation Measure (PAM): a validated, licenced tool measuring the spectrum of  
24 knowledge, skills, and confidence in patients and capturing the extent to which they feel  
25 329 engaged and confident in taking care of their condition ('activation').<sup>77</sup>  
26 330  
27 331 (6) Brief Health Literacy Screen (BHLS): a 3-item questionnaire to identify inadequate health  
28 literacy,<sup>78</sup> validated against longer screening tools in populations with ESKD.<sup>79 80</sup>  
29 332  
30 333 (7) The Global Physical Activity Questionnaire (GPAQ): developed by the World Health  
31 Organisation (WHO) for physical activity surveillance in countries. It collects information on  
32 334 physical activity participation in three settings or domains (activity at work, travel to and from  
33 335 places, and recreational activities) as well as sedentary behaviour, comprising 16 questions.<sup>81</sup>  
34 336  
35 337 (8) Duke Activity Status Index (DASI): a 12-item questionnaire that uses self-reported physical  
36 work capacity to estimate peak metabolic equivalents and has been shown to be a valid  
37 338 measurement of functional capacity.<sup>82</sup>  
38 339

39 340 *Habitual physical activity*  
40

41 341 Objective data on habitual physical activity levels over a 7-day period (ideal minimum 6-days)<sup>83</sup> will be  
42 342 gained from tri-axial accelerometers (GENEActiv, ActivInsights Ltd., Cambridge, UK). Participants will  
43 343 receive the monitor at the baseline and follow-up assessments and will be asked to wear it from  
44 344 midnight that evening for 7 days.  
45

46 345 *Blood and urine sampling*  
47  
48  
49  
50  
51  
52  
53  
54  
55  
56  
57  
58  
59  
60

346 Venous blood (30 ml) will be collected using venepuncture of the antecubital vein and prepared and  
347 stored appropriately for the following analysis:

- 348 • Circulating markers of cardiovascular disease
- 349 • Circulating markers of systemic inflammation and oxidative stress
- 350 • Blood glucose and HbA1c
- 351 • Lipids and triglycerides
- 352 • Full blood count and renal profile

353 A urine sample will be requested to ascertain urinary protein:creatinine ratio.

354 Follow-up assessments

355 Follow up visits are summarised in Figure 1. An instructional session (or more if required) following  
356 baseline assessments will allow the intervention group to become familiar with the exercise  
357 requirements and allow the research team to ensure safety and competence before commencing the  
358 12-week home-based training program. This can be via video call or in-person. At 6 weeks into the 12-  
359 week period for the intervention group only, participants will be invited to review exercise progression  
360 (via video call or in-person), particularly if participants are struggling to undertake the requisite  
361 amount of exercise, and as a refresher of the intervention. This combined with regular contact from  
362 research staff should aid participant compliance and monitoring.

363 Final assessments will be conducted for the exercise and control groups within 7 days of completing  
364 the 12-week exercise or control period. Assessments completed will be identical to the baseline visit  
365 with the addition of a 'patient satisfaction questionnaire' to allow pragmatic future development of  
366 the study. This will also be offered to participants who withdraw from the trial. Three months after  
367 completing the exercise intervention, participants will be contacted for a semi-structured one-to-one  
368 telephone interview. This will aim to understand the impact of the intervention, if any, on subsequent  
369 lifestyle and exercise habits.

#### 370 **Sub-studies**

371 Additional informed consent will be sought for:

- 372 1. Ten 'healthy' control participants to undertake a CPET to assess the differences, if any,  
373 between CPET parameters in 'healthy controls' versus KTRs, particularly during the recovery  
374 period.
- 375 2. KTRs completing the exercise intervention will be invited to undertake a semi-structured  
376 interview (via telephone, video call, or in-person) incorporating exercise self-efficacy,  
377 enjoyment, difficulties encountered, perceived advantages and disadvantages of the

1  
2  
3 378 intervention, and study design. Participants who withdraw before the end of the intervention  
4  
5 379 will also be invited to attend, although in line with ethical standards, this will be optional.  
6

### 7 380 **Sample size**

8  
9 381 The purpose of this pilot study is to obtain appropriate data to adequately power future definitive  
10  
11 382 trials;<sup>84</sup> a power calculation is neither relevant nor possible. A minimum sample size of 50 is based on  
12  
13 383 accepted values to provide adequate estimates of standard deviations for future power calculations.<sup>85</sup>  
14

### 15 384 **Data collection and management**

16  
17 385 Data from all time points will be collected in case report forms (CRFs) by the trial team. All data will  
18  
19 386 be entered into a secure database and will only be accessible on password-protected computers at  
20  
21 387 UHL and University of Leicester by relevant members of the study team. No identifying information  
22  
23 388 will be kept in electronic form. All source data and original participant identities will be kept in a locked  
24  
25 389 office in the trial site file only at UHL.

### 26 390 **Data analysis**

27  
28 391 Data will be assessed for normality using histograms, the Shapiro-Wilk test and Q-Q plots. Continuous  
29  
30 392 data to be expressed as mean ( $\pm$  standard deviation), if normally distributed or median (interquartile  
31  
32 393 range) if not. To investigate the differences between interventions we will use analysis of (co-)  
33  
34 394 variance. Independent samples t-tests and Mann-Whitney U tests will be used assess for baseline  
35  
36 395 differences between variables for normally and non-normally distributed data respectively. These  
37  
38 396 data will be used to inform the power calculation for future definitive trials.

39 397 Qualitative data will be transcribed verbatim and analysed according to the principles of interpretive  
40  
41 398 thematic analysis to explore themes emerging from patient journeys through, and experiences of, the  
42  
43 399 interventions and outcome measures.

44 400 Outcomes pertaining to the feasibility of the intervention and trial will be assessed and include:

- 45  
46 401 • *Eligibility*: the percentage of patients screened who are eligible.
- 47  
48 402 • *Recruitment rate*: the percentage of patients eligible who consent to the trial and the monthly  
49  
50 403 recruitment rate.
- 51  
52 404 • *Adherence to the exercise intervention*: the number of completed sessions per week and  
53  
54 405 specific intensity and durations achieved.
- 55  
56 406 • *Acceptability of randomisation*: comparison of the final group characteristics and  
57  
58 407 identification of any stratification variables, if applicable.
- 59  
60 408 • *Attrition rate*: the number of participants that drop-out of the study.
- 409 • *Outcome acceptability*: the percentage of missing data for each outcome measure.

- 1  
2  
3 410 • *Safety*: The number of self-reported injuries or adverse events throughout the trial.  
4

5 411 The *a priori* thresholds for specific feasibility and acceptability criteria are as follows: eligibility ( $\geq 50\%$ ),  
6 412 recruitment success of 20% of eligible participants ( $\geq 2$  participants per month), adherence (an average  
7 413 of 3 exercise sessions per week) and attrition ( $\leq 30\%$ ).  
8  
9

#### 10 414 **Safety reporting**

11  
12  
13 415 All adverse events (AEs) or adverse reactions (ARs) and serious adverse events (SAEs) or serious  
14 416 adverse reactions (SARs) will be recorded from the time a patient enters the study to the final study  
15 417 visit. Each AE or AR will be considered for severity, causality, and expectedness and may be reclassified  
16 418 as an SAE or SAR if required.  
17

18  
19  
20 419 An SAE is any AE that:

- 21 420 • is life threatening  
22  
23 421 • requires hospitalization or prolongation of a hospital admission  
24  
25 422 • results in a persistent or significant disability/incapacity  
26  
27 423 • is a congenital anomaly  
28  
29 424 • results in death

30  
31 425 All AEs and ARs will be documented in participants CRFs, medical notes, and an AE log and will record  
32 426 the following information: description, date of onset and end date, severity, assessment of  
33 427 relatedness to study, other suspect device and action taken. Only AEs that are judged to be related to  
34 428 the study intervention or procedures will be reported to the sponsor.

35  
36  
37 429 All SAEs will be reported by the investigators to the sponsor within 24 hours of discovery or notification  
38 430 and the report will be signed by the chief investigator within 7 days. If the SAE is deemed related to  
39 431 the research procedures or intervention and is unexpected, a report will be sent to the research ethics  
40 432 committee (REC) within 15 days.  
41

#### 42 433 **Patient and public involvement**

43  
44  
45  
46 434 A patient and public involvement (PPI) group has been convened and will meet with the research team  
47 435 to review progress and address issues that arise throughout the duration of the study. The PPI partners  
48 436 will assist in the interpretation and dissemination of results. The trial was designed in consultation  
49 437 with PPI partners who advised on intervention content and outcome measure acceptability, paying  
50 438 particular attention to patient burden, ensuring outcome measures would not over-burden  
51 439 participants. The PPI group approved the final design and duration of this intervention and advised  
52 440 the inclusion of an initial supervised intervention familiarisation period to build confidence in exercise  
53 441 capability.  
54  
55  
56  
57  
58  
59

#### 60 442 **Changes to the study protocol following the COVID-19 pandemic**

1  
2  
3 443 The COVID-19 pandemic has made us all review the ways we design and deliver clinical studies. Whilst  
4  
5 444 patient safety remains the absolute priority of clinical and research teams, there is a need for research  
6  
7 445 to continue in a safe way that balances the benefits of continuing programs of research against the  
8  
9 446 risks from COVID-19. We have amended the study protocol in several ways to reduce any additional  
10  
11 447 exposure of patients to clinical environments where COVID-19 may be present:

- 12 448 • We have reduced the number of study visits to a minimum. The original study flow diagram is  
13  
14 449 included in Additional file 1. All interim assessments have been removed in the modified  
15  
16 450 protocol (Fig. 1) and the baseline and final study visits are now wrapped into part of patient  
17  
18 451 clinical care. That is to say, when they attend for their baseline and follow-up study visits they  
19  
20 452 will have their clinical review and clinical blood tests as they would for their normal clinical  
21  
22 453 care with a transplant nephrologist (MGB), so there is no increase in-patient visits to a clinical  
23  
24 454 environment over-and-above their normal care.
- 25 455 • The original study design included a 2-week face-to-face training period where participants  
26  
27 456 would attend the hospital to learn how to complete the exercises and the exercise program  
28  
29 457 with a member of the research team. This training period will now be done remotely, via video  
30  
31 458 conferencing, with discussion and feedback over the telephone and using the instructional  
32  
33 459 videos and literature that support the home-based exercise intervention.
- 34 460 • When participants attend for their study visits, departmental procedures have been updated  
35  
36 461 to now include meticulous cleaning of all equipment before and after use, one-way flows of  
37  
38 462 participants to ensure participants do not mix, and the use of personal protective equipment  
39  
40 463 for all staff and participants.

41 464 The above changes have been agreed with the local REC and the study sponsor and have allowed  
42  
43 465 recommencement of study recruitment and procedures.

## 44 466 **DISCUSSION**

45  
46 467 This pilot study is designed to assess the feasibility of delivering a structured, home-based, exercise  
47  
48 468 intervention in KTRs at increased cardiometabolic risk and evaluate the putative effects on  
49  
50 469 cardiovascular structure and functional changes, cardiorespiratory fitness, quality of life, healthcare  
51  
52 470 utilisation, patient activation, and engagement with the prescribed exercise program. It is the first trial  
53  
54 471 to use a pragmatic home-based program of exercise this patient group. It is also the first to use CMR  
55  
56 472 to evaluate the structural and functional changes of the heart in this at risk population.

57 473 Qualitative data will provide valuable personal perspectives on the acceptability of this specific  
58  
59 474 exercise program. Transplant recipients experience complex medical journeys and are likely to have  
60

1  
2  
3 475 specific unmet needs in the area of exercise and lifestyle. This will be valuable information for future  
4  
5 476 randomised controlled trials (RCTs) and exercise guideline development.  
6

7 477 Home-based intervention outcomes are reliant on accurate reporting by participants with regards to  
8  
9 478 frequency, intensity, and duration of exercise performed. This under-reporting is often a limitation of  
10  
11 479 unsupervised interventions. We will ensure participants are correctly advised of how to monitor and  
12  
13 480 report their exercise completion throughout the trial and encourage this through telephone  
14  
15 481 communications.

16 482 We anticipate that a positive outcome will lead to both an increased understanding of the specific  
17  
18 483 exercise requirements of KTRs and the development of new programs that promote longer-term  
19  
20 484 engendered lifestyle change that can be incorporated into standard practice with much lower financial  
21  
22 485 implications than in-centre supervised rehabilitation.  
23

24 486

25 487

26 488  
27  
28  
29  
30  
31  
32  
33  
34  
35  
36  
37  
38  
39  
40  
41  
42  
43  
44  
45  
46  
47  
48  
49  
50  
51  
52  
53  
54  
55  
56  
57  
58  
59  
60

1  
2  
3 489 **DECLARATIONS**

4  
5 490

6 491 **Ethical issues**

7  
8 492

9  
10 493 University of Leicester are the sponsor for this study (UOL 0714). The protocol was reviewed by the  
11 494 East Midlands-Nottingham 2 research ethics committee and was given a favourable opinion (REC ref  
12 495 19/EM/0209) on 14/10/2019. Health Research Authority regulatory approval was given on  
13 496 14/10/2019, and the study was adopted on the National Institute for Health Research (NIHR) portfolio  
14  
15 497 on 26/09/2019. Local governance approval was granted by UHL R&I on 31/01/2020. This study was  
16 498 prospectively registered with ClinicalTrials.gov (NCT04123951; 11.10.2019). The first participant was  
17 499 recruited on 09/03/2020. The predicted study end date is 31/12/2022. This manuscript is quorate with  
20 500 the most recent approved protocol (version 6 26.08.2020). Relevant parties will be informed of any  
21  
22 501 substantial protocol modifications. Steps have been taken when designing this protocol to minimise  
23 502 the ethical implications and ensure patient welfare. The study will comply with the International  
24  
25 503 Conference for Harmonisation of Good Clinical Practice (ICH GCP) guidelines and the Research  
26 504 Governance Framework for Health and Social Care.  
27  
28  
29

30 505

31 506 **Dissemination:** On completion the results of this study will be published in peer-reviewed journals  
32 507 and presented at national and international conferences. Contributions of all authors to manuscripts  
33 508 arising from this study will be made explicit in the relevant of each individual journal. Participant level  
34 509 data will be available following publication of results on request to the Chief Investigator. Results will  
35 510 also be disseminated to the patient and public community via social media and newsletter articles and  
36 511 presentations at patient conferences and forums, led by the patient partners. It is anticipated that the  
37 512 results of this study will inform future design of larger RCTs in this subject area and contribute to  
38 513 future specific physical activity guidelines in this population.  
39  
40  
41  
42  
43  
44

45 514

46 515 **Twitter:** REB, @RBillany; MGB, @DrMattGB.

47 516

48  
49  
50 517 **Author contributions:** MGB is the chief investigator for this trial. REB and MGB are responsible for the  
51 518 study design, study setup, completion of study visits, drafting the manuscript, revision of the  
52 519 manuscript, and finalising the manuscript. NCB, TJW, KAR, KC, EMB, NJC, ACW, JB, GPM, JOB, and ACS  
53 520 are responsible for the study design, drafting the manuscript, and revision of the manuscript. NV, SA,  
54 521 JW, and KP are responsible for completion of study visits, drafting the manuscript, and revision of  
55 522 manuscript.  
56  
57  
58  
59  
60



1  
2  
3 523  
4  
5 524  
6  
7 525  
8  
9 526  
10 527  
11  
12 528  
13 529  
14  
15 530  
16  
17 531  
18 532  
19  
20 533  
21  
22 534  
23 535  
24  
25 536  
26  
27 537  
28  
29 538  
30  
31 539  
32  
33 540  
34  
35 541  
36  
37 542  
38  
39 543  
40  
41 544  
42  
43 545  
44  
45 546  
46  
47 547  
48  
49 548  
50  
51 549  
52  
53 550  
54  
55 551  
56  
57 552  
58  
59  
60

**Funding:** This study is funded by a project grant from Kidney Research UK (ref: KS\_RP\_003\_20180913). Neither the sponsor nor the funder had or will have any input into study design; collection, management, analysis, and interpretation of data; writing of the report; or the decision to submit the report for publication.

**Acknowledgements:** This research is supported by the National Institute for Health Research (NIHR) Leicester Biomedical Research Centre. The views expressed are those of the authors and not necessarily those of the NHS, the NIHR or the Department of Health.

**Competing interests:** None declared.

**Consent for publication:** Not applicable.

## 553 REFERENCES

554

- 555 1. Oniscu GC, Brown H, Forsythe JLR. How great is the survival advantage of transplantation over  
556 dialysis in elderly patients? *Nephrol Dial Transpl* 2004;19(4):945-51. doi: 10.1093/ndt/gfh022
- 557 2. Steenkamp R, Rao A, Fraser S. UK Renal Registry 18th Annual Report (December 2015) Chapter 5:  
558 Survival and Causes of Death in UK Adult Patients on Renal Replacement Therapy in 2014:  
559 National and Centre-specific Analyses. *Nephron* 2016;132 Suppl 1:111-44. doi:  
560 10.1159/000444819
- 561 3. Neale J, Smith AC. Cardiovascular risk factors following renal transplant. *World J Transplant*  
562 2015;5(4):183-95. doi: 10.5500/wjt.v5.i4.183
- 563 4. UK Renal Registry (2020) UK Renal Registry 22nd Annual Report – data to 31/12/2018, Bristol, UK.  
564 Available from renal.org/audit-research/annual-report
- 565 5. Kasiske BL, Gujjarro C, Massy ZA, et al. Cardiovascular disease after renal transplantation. *J Am Soc*  
566 *Nephrol* 1996;7(1):158-65
- 567 6. Carpenter MA, John A, Weir MR, et al. BP, cardiovascular disease, and death in the Folic Acid for  
568 Vascular Outcome Reduction in Transplantation trial. *J Am Soc Nephrol* 2014;25(7):1554-62.  
569 doi: 10.1681/asn.2013040435
- 570 7. Mall G, Huther W, Schneider J, et al. Diffuse intermyocardiocytic fibrosis in uraemic patients.  
571 *Nephrol Dial Transplant* 1990;5(1):39-44. doi: 10.1093/ndt/5.1.39
- 572 8. Bakri RS, Afzali B, Covic A, et al. Cardiovascular disease in renal allograft recipients is associated with  
573 elevated sialic acid or markers of inflammation. *Clin Transpl* 2004;18(2):201-04. doi:  
574 10.1111/j.1399-0012.2004.00156.x
- 575 9. Liefeldt L, Budde K. Risk factors for cardiovascular disease in renal transplant recipients and  
576 strategies to minimize risk. *Transpl Int* 2010;23(12):1191-204. doi: 10.1111/j.1432-  
577 2277.2010.01159.x
- 578 10. Van Laecke S, Malfait T, Schepers E, et al. Cardiovascular disease after transplantation: an  
579 emerging role of the immune system. *Transpl Int* 2018;31(7):689-99. doi: 10.1111/tri.13160
- 580 11. Weiner DE, Tighiouart H, Elsayed EF, et al. The Framingham predictive instrument in chronic kidney  
581 disease. *J Am Coll Cardiol* 2007;50(3):217-24. doi: 10.1016/j.jacc.2007.03.037
- 582 12. Aalten J, Peeters SA, van der Vlugt MJ, et al. Is standardized cardiac assessment of asymptomatic  
583 high-risk renal transplant candidates beneficial? *Nephrol Dial Transplant* 2011;26(9):3006-12.  
584 doi: 10.1093/ndt/gfq822
- 585 13. Mansell H, Rosaasen N, Dean J, et al. Evidence of enhanced systemic inflammation in stable kidney  
586 transplant recipients with low Framingham risk scores. *Clin Transpl* 2013;27(4):E391-E99
- 587 14. Mansell H, Stewart SA, Shoker A. Validity of cardiovascular risk prediction models in kidney  
588 transplant recipients. *Sci World J* 2014;2014:750579. doi: 10.1155/2014/750579
- 589 15. Devine PA, Courtney AE, Maxwell AP. Cardiovascular risk in renal transplant recipients. *J Nephrol*  
590 2019;32(3):389-99. doi: 10.1007/s40620-018-0549-4
- 591 16. Kasiske BL. Epidemiology of cardiovascular disease after renal transplantation. *Transplantation*  
592 2001;72(6 Suppl):S5-8. doi: 10.1097/00007890-200109271-00003
- 593 17. de Albuquerque Suassuna P, Sanders-Pinheiro H, de Paula R. Uremic Cardiomyopathy: A New Piece  
594 in the Chronic Kidney Disease-Mineral and Bone Disorder Puzzle. *Front Med (Lausanne)*  
595 2018;5:206-06. doi: 10.3389/fmed.2018.00206
- 596 18. Aoki J, Ikari Y, Nakajima H, et al. Clinical and pathologic characteristics of dilated cardiomyopathy  
597 in hemodialysis patients. *Kidney Int* 2005;67(1):333-40. doi: 10.1111/j.1523-  
598 1755.2005.00086.x
- 599 19. Mark PB, Doyle A, Blyth KG, et al. Vascular function assessed with cardiovascular magnetic  
600 resonance predicts survival in patients with advanced chronic kidney disease. *J Cardiovasc*  
601 *Magn R* 2008;10:39. doi: 10.1186/1532-429x-10-39

- 1  
2  
3 602 20. Foley RN, Parfrey PS, Harnett JD, et al. Clinical and echocardiographic disease in patients starting  
4 603 end-stage renal disease therapy. *Kidney Int* 1995;47(1):186-92. doi: 10.1038/ki.1995.22  
5 604 21. Foley RN, Parfrey PS, Harnett JD, et al. The prognostic importance of left ventricular geometry in  
6 605 uremic cardiomyopathy. *J Am Soc Nephrol* 1995;5(12):2024-31  
7 606 22. Ali A, Macphee I, Kaski JC, et al. Cardiac and vascular changes with kidney transplantation. *Indian*  
8 607 *J Nephrol* 2016;26(1):1-9. doi: 10.4103/0971-4065.165003  
9 608 23. Patel RK, Mark PB, Johnston N, et al. Renal Transplantation Is Not Associated with Regression of  
10 609 Left Ventricular Hypertrophy: A Magnetic Resonance Study. *Clin J Am Soc Nephrol*  
11 610 2008;3(6):1807-11. doi: 10.2215/cjn.01400308  
12 611 24. Graham-Brown MPM, Adenwalla SF, Lai FY, et al. The reproducibility of cardiac magnetic  
13 612 resonance imaging measures of aortic stiffness and their relationship to cardiac structure in  
14 613 prevalent haemodialysis patients. *Clin Kidney J* 2018;11(6):864-73. doi: 10.1093/ckj/sfy042  
15 614 25. Graham-Brown MPM, Rutherford E, Levelt E, et al. Native T1 mapping: inter-study, inter-observer  
16 615 and inter-center reproducibility in hemodialysis patients. *J Cardiovasc Magn R* 2017;19(1) doi:  
17 616 10.1186/s12968-017-0337-7  
18 617 26. Graham-Brown MP, Gulsin GS, Parke K, et al. A comparison of the reproducibility of two cine-  
19 618 derived strain software programmes in disease states. *Eur J Radiol* 2019;113:51-58. doi:  
20 619 10.1016/j.ejrad.2019.01.026  
21 620 27. Kriska AM, Saremi A, Hanson RL, et al. Physical activity, obesity, and the incidence of type 2  
22 621 diabetes in a high-risk population. *Am J Epidemiol* 2003;158(7):669-75. doi:  
23 622 10.1093/aje/kwg191  
24 623 28. Stamatakis E, Gale J, Bauman A, et al. Sitting Time, Physical Activity, and Risk of Mortality in Adults.  
25 624 *J Am Coll Cardiol* 2019;73(16):2062-72. doi: doi:10.1016/j.jacc.2019.02.031  
26 625 29. Koolhaas CM, Dhana K, Schoufour JD, et al. Impact of physical activity on the association of  
27 626 overweight and obesity with cardiovascular disease: The Rotterdam Study. *Eur J Prev Cardiol*  
28 627 2017;24(9):934-41. doi: 10.1177/2047487317693952  
29 628 30. Swift DL, Lavie CJ, Johannsen NM, et al. Physical activity, cardiorespiratory fitness, and exercise  
30 629 training in primary and secondary coronary prevention. *Circ J* 2013;77(2):281-92. doi:  
31 630 10.1253/circj.cj-13-0007  
32 631 31. Barengo NC, Hu G, Lakka TA, et al. Low physical activity as a predictor for total and cardiovascular  
33 632 disease mortality in middle-aged men and women in Finland. *Eur Heart J* 2004;25(24):2204-  
34 633 11. doi: 10.1016/j.ehj.2004.10.009  
35 634 32. Nielens H, Lejeune TM, Lalaoui A, et al. Increase of physical activity level after successful renal  
36 635 transplantation: a 5 year follow-up study. *Nephrol Dial Transpl* 2001;16(1):134-40. doi:  
37 636 10.1093/ndt/16.1.134  
38 637 33. Dontje ML, de Greef MH, Krijnen WP, et al. Longitudinal measurement of physical activity following  
39 638 kidney transplantation. *Clin Transplant* 2014;28(4):394-402. doi: 10.1111/ctr.12325  
40 639 34. Wilkinson TJ, Clarke AL, Nixon DGD, et al. Prevalence and correlates of physical activity across  
41 640 kidney disease stages: an observational multicentre study. *Nephrol Dial Transpl* 2019 doi:  
42 641 10.1093/ndt/gfz235  
43 642 35. Booth FW, Roberts CK, Laye MJ. Lack of exercise is a major cause of chronic diseases. *Compr Physiol*  
44 643 2012;2(2):1143-211. doi: 10.1002/cphy.c110025  
45 644 36. Booth FW, Laye MJ, Roberts MD. Lifetime sedentary living accelerates some aspects of secondary  
46 645 aging. *J Appl Physiol* 2011;111(5):1497-504. doi: 10.1152/jappphysiol.00420.2011  
47 646 37. Oguchi H, Tsujita M, Yazawa M, et al. The efficacy of exercise training in kidney transplant  
48 647 recipients: a meta-analysis and systematic review. *Clin Exp Nephrol* 2019;23(2):275-84. doi:  
49 648 10.1007/s10157-018-1633-8  
50 649 38. Mathur S, Janaudis-Ferreira T, Wickerson L, et al. Meeting Report: Consensus Recommendations  
51 650 for a Research Agenda in Exercise in Solid Organ Transplantation. *Am J Transplant*  
52 651 2014;14(10):2235-45. doi: 10.1111/ajt.12874  
53  
54  
55  
56  
57  
58  
59  
60

1  
2  
3  
4  
5  
6  
7  
8  
9  
10  
11  
12  
13  
14  
15  
16  
17  
18  
19  
20  
21  
22  
23  
24  
25  
26  
27  
28  
29  
30  
31  
32  
33  
34  
35  
36  
37  
38  
39  
40  
41  
42  
43  
44  
45  
46  
47  
48  
49  
50  
51  
52  
53  
54  
55  
56  
57  
58  
59  
60

- 652 39. Masajtis-Zagajewska A, Muras K, Nowicki M. Effects of a Structured Physical Activity Program on  
653 Habitual Physical Activity and Body Composition in Patients With Chronic Kidney Disease and  
654 in Kidney Transplant Recipients. *Exp Clin Transplant* 2019;17(2):155-64. doi:  
655 10.6002/ect.2017.0305
- 656 40. O'Connor EM, Koufaki P, Mercer TH, et al. Long-term pulse wave velocity outcomes with aerobic  
657 and resistance training in kidney transplant recipients - A pilot randomised controlled trial.  
658 *PLoS One* 2017;12(2):e0171063. doi: 10.1371/journal.pone.0171063
- 659 41. Moraes Dias CJ, Anaisse Azoubel LM, Araujo Costa H, et al. Autonomic modulation analysis in active  
660 and sedentary kidney transplanted recipients. *Clin Exp Pharmacol Physiol* 2015;42(12):1239-  
661 44. doi: 10.1111/1440-1681.12481
- 662 42. Karelis AD, Hébert MJ, Rabasa-Lhoret R, et al. Impact of Resistance Training on Factors Involved in  
663 the Development of New-Onset Diabetes After Transplantation in Renal Transplant  
664 Recipients: An Open Randomized Pilot Study. *Can J Diabetes* 2016;40(5):382-88. doi:  
665 10.1016/j.cjcd.2015.08.014
- 666 43. Roi GS, Stefoni S, Mosconi G, et al. Physical activity in solid organ transplant recipients:  
667 organizational aspects and preliminary results of the Italian project. *Transplant Proc*  
668 2014;46(7):2345-9. doi: 10.1016/j.transproceed.2014.07.055
- 669 44. Romano G, Simonella R, Falletti E, et al. Physical training effects in renal transplant recipients. *Clin*  
670 *Transplant* 2010;24(4):510-4. doi: 10.1111/j.1399-0012.2009.01098.x
- 671 45. Kinnafick FE, Thogersen-Ntoumani C, Shepherd SO, et al. In It Together: A Qualitative Evaluation  
672 of Participant Experiences of a 10-Week, Group-Based, Workplace HIIT Program for  
673 Insufficiently Active Adults. *J Sport Exerc Psychol* 2018;40(1):10-19. doi: 10.1123/jsep.2017-  
674 0306
- 675 46. van Baar ME, Dekker J, Oostendorp RA, et al. Effectiveness of exercise in patients with  
676 osteoarthritis of hip or knee: nine months' follow up. *Ann Rheum Dis* 2001;60(12):1123-30.  
677 doi: 10.1136/ard.60.12.1123
- 678 47. Timmons JF, Griffin C, Cogan KE, et al. Exercise Maintenance in Older Adults 1 Year After  
679 Completion of a Supervised Training Intervention. *J Am Geriatr Soc* 2020;68(1):163-69. doi:  
680 10.1111/jgs.16209
- 681 48. Hibbard JH, Greene J. What The Evidence Shows About Patient Activation: Better Health Outcomes  
682 And Care Experiences; Fewer Data On Costs. *Health Affairs* 2013;32(2):207-14. doi:  
683 10.1377/hlthaff.2012.1061
- 684 49. Skolasky RL, Mackenzie EJ, Wegener ST, et al. Patient activation and adherence to physical therapy  
685 in persons undergoing spine surgery. *Spine (Phila Pa 1976)* 2008;33(21):E784-E91. doi:  
686 10.1097/BRS.0b013e31818027f1
- 687 50. Baggetta R, D'Arrigo G, Torino C, et al. Effect of a home based, low intensity, physical exercise  
688 program in older adults dialysis patients: a secondary analysis of the EXCITE trial. *BMC Geriatr*  
689 2018;18(1):248. doi: 10.1186/s12877-018-0938-5
- 690 51. Imran HM, Baig M, Erqou S, et al. Home-Based Cardiac Rehabilitation Alone and Hybrid With  
691 Center-Based Cardiac Rehabilitation in Heart Failure: A Systematic Review and Meta-Analysis.  
692 *J Am Heart Assoc* 2019;8(16):e012779. doi:10.1161/JAHA.119.012779
- 693 52. Uchiyama K, Washida N, Morimoto K, et al. Home-based Aerobic Exercise and Resistance Training  
694 in Peritoneal Dialysis Patients: A Randomized Controlled Trial. *Sci Rep* 2019;9(1):2632. doi:  
695 10.1038/s41598-019-39074-9
- 696 53. Aoike DT, Baria F, Kamimura MA, et al. Home-based versus center-based aerobic exercise on  
697 cardiopulmonary performance, physical function, quality of life and quality of sleep of  
698 overweight patients with chronic kidney disease. *Clin Exp Nephrol* 2018;22(1):87-98. doi:  
699 10.1007/s10157-017-1429-2
- 700 54. Majchrzak KM, Pupim LB, Chen K, et al. Physical activity patterns in chronic hemodialysis patients:  
701 comparison of dialysis and nondialysis days. *J Ren Nutr* 2005;15(2):217-24. doi:  
702 10.1053/j.jrn.2004.08.002

- 1  
2  
3 703 55. Carvalho EV, Reboredo MM, Gomes EP, et al. Physical activity in daily life assessed by an  
4 704 accelerometer in kidney transplant recipients and hemodialysis patients. *Transplant Proc*  
5 705 2014;46(6):1713-7. doi: 10.1016/j.transproceed.2014.05.019  
6 706  
7 707 56. Borg GA. Perceived exertion: a note on "history" and methods. *Med Sci Sports* 1973;5(2):90-3.  
8 708  
9 709 57. Brzycki M. Strength Testing—Predicting a One-Rep Max from Reps-to-Fatigue. *Journal of Physical*  
10 710 *Education, Recreation & Dance* 1993;64(1):88-90. doi: 10.1080/07303084.1993.10606684  
11 711  
12 712 58. Schoenfeld BJ, Grgic J, Ogborn D, et al. Strength and Hypertrophy Adaptations Between Low- vs.  
13 713 High-Load Resistance Training: A Systematic Review and Meta-analysis. *J Strength Cond Res*  
14 714 2017;31(12):3508-23. doi: 10.1519/jsc.0000000000002200  
15 715  
16 716 59. Hunold P, Vogt FM, Heemann UW, et al. Myocardial mass and volume measurement of  
17 717 hypertrophic left ventricles by MRI—study in dialysis patients examined before and after  
18 718 dialysis. *J Cardiovasc Magn R* 2003;5(4):553-61. doi: 10.1081/jcmr-120025230  
19 719  
20 720 60. Graham-Brown MP, March DS, Churchward DR, et al. Novel cardiac nuclear magnetic resonance  
21 721 method for noninvasive assessment of myocardial fibrosis in hemodialysis patients. *Kidney Int*  
22 722 2016;90(4):835-44. doi: 10.1016/j.kint.2016.07.014  
23 723  
24 724 61. Xu HY, Yang ZG, Zhang Y, et al. Prognostic value of heart failure in hemodialysis-dependent end-  
25 725 stage renal disease patients with myocardial fibrosis quantification by extracellular volume on  
26 726 cardiac magnetic resonance imaging. *BMC Cardiovasc Disord* 2020;20(1):12. doi:  
27 727 10.1186/s12872-019-01313-2  
28 728  
29 729 62. Graham-Brown MP, Singh AS, Gulsin GS, et al. Defining myocardial fibrosis in haemodialysis  
30 730 patients with non-contrast cardiac magnetic resonance. *BMC Cardiovasc Disord*  
31 731 2018;18(1):145. doi: 10.1186/s12872-018-0885-2  
32 732  
33 733 63. Xue H, Brown LAE, Nielles-Vallespin S, et al. Automatic in-line quantitative myocardial perfusion  
34 734 mapping: Processing algorithm and implementation. *Magn Reson Med* 2020;83(2):712-30.  
35 735 doi: 10.1002/mrm.27954  
36 736  
37 737 64. Gould DW, Watson EL, Wilkinson TJ, et al. Ultrasound assessment of muscle mass in response to  
38 738 exercise training in chronic kidney disease: a comparison with MRI. *J Cachexia Sarcopenia*  
39 739 *Muscle* 2019;10(4):748-55. doi: 10.1002/jcsm.12429  
40 740  
41 741 65. ATS/ACCP Statement on Cardiopulmonary Exercise Testing. *Am J Resp Crit Care* 2003;167(2):211-  
42 742 77. doi: 10.1164/rccm.167.2.211  
43 743  
44 744 66. Podsiadlo D, Richardson S. The timed "Up & Go": a test of basic functional mobility for frail elderly  
45 745 persons. *J Am Geriatr Soc* 1991;39(2):142-8. doi: 10.1111/j.1532-5415.1991.tb01616.x  
46 746  
47 747 67. Hadjiioannou I, Wong K, Lindup H, et al. Test-retest reliability for physical function measures in  
48 748 patients with chronic kidney disease. *J Ren Care* 2019 doi: 10.1111/jorc.12310  
49 749  
50 750 68. Wilkinson TJ, Nixon DGD, Smith AC. Postural stability during standing and its association with  
51 751 physical and cognitive functions in non-dialysis chronic kidney disease patients. *Int J Nephrol*  
52 752 *Urol* 2019;51(8):1407-14. doi: 10.1007/s11255-019-02192-4  
53 753  
54 754 69. Eston RG, Reilly T. Kinanthropometry and exercise physiology laboratory manual: tests,  
55 755 procedures, and data. 3rd ed. Abingdon: Routledge 2009.  
56 756  
57 757 70. Chertow GM, Lowrie EG, Wilmore DW, et al. Nutritional assessment with bioelectrical impedance  
58 758 analysis in maintenance hemodialysis patients. *J Am Soc Nephrol* 1995;6(1):75-81.  
59 759  
60 760 71. Macdonald JH, Marcora SM, Jibani M, et al. Bioelectrical impedance can be used to predict muscle  
mass and hence improve estimation of glomerular filtration rate in non-diabetic patients with  
chronic kidney disease. *Nephrol Dial Transpl* 2006;21(12):3481-7. doi: 10.1093/ndt/gfl432  
72. Raj R, Ahuja K, Frandsen M, et al. Validation of the IPOS-Renal Symptom Survey in Advanced Kidney  
Disease: A Cross-sectional Study. *J Pain Symptom Manage* 2018;56(2):281-87. doi:  
10.1016/j.jpainsymman.2018.04.006  
73. Ware Jr JE, Kosinski M, Keller SD. A 12-Item Short-Form Health Survey: construction of scales and  
preliminary tests of reliability and validity. *Med Care* 1996:220-33.

- 1  
2  
3 752 74. Wang S-Y, Zang X-Y, Liu J-D, et al. Psychometric Properties of the Functional Assessment of Chronic  
4 753 Illness Therapy-Fatigue (FACIT-Fatigue) in Chinese Patients Receiving Maintenance Dialysis. *J*  
5 754 *Pain Symptom Manage* 2015;49(1):135-43. doi: 10.1016/j.jpainsymman.2014.04.011  
6 755  
7 756 75. Yellen SB, Cella DF, Webster K, et al. Measuring fatigue and other anemia-related symptoms with  
8 757 the Functional Assessment of Cancer Therapy (FACT) measurement system. *J Pain Symptom*  
9 758 *Manage* 1997;13(2):63-74. doi: 10.1016/s0885-3924(96)00274-6  
10 759  
11 760 76. Buysse DJ, Reynolds CF, Monk TH, et al. The Pittsburgh Sleep Quality Index: a new instrument for  
12 761 psychiatric practice and research. *Psychiatry Res* 1989;28(2):193-213. doi: 10.1016/0165-  
13 762 1781(89)90047-4  
14 763  
15 764 77. Hibbard JH, Stockard J, Mahoney ER, et al. Development of the Patient Activation Measure (PAM):  
16 765 Conceptualizing and Measuring Activation in Patients and Consumers. *Health Serv Res*  
17 766 2004;39(4p1):1005-26. doi: 10.1111/j.1475-6773.2004.00269.x  
18 767  
19 768 78. Chew LD, Bradley KA, Boyko EJ. Brief questions to identify patients with inadequate health literacy.  
20 769 *Fam Med* 2004;36(8):588-94  
21 770  
22 771 79. Cavanaugh KL, Osborn CY, Tentori F, et al. Performance of a brief survey to assess health literacy  
23 772 in patients receiving hemodialysis. *Clinical Kidney Journal* 2015;8(4):462-8. doi:  
24 773 <https://dx.doi.org/10.1093/ckj/sfv037>  
25 774  
26 775 80. Dageforde LA, Cavanaugh KL, Moore DE, et al. Validation of the written administration of the short  
27 776 literacy survey. *J Health Commun* 2015;20(7):835-42. doi: 10.1080/10810730.2015.1018572  
28 777  
29 778 81. Bull FC, Maslin TS, Armstrong T. Global physical activity questionnaire (GPAQ): nine country  
30 779 reliability and validity study. *J Phys Act Health* 2009;6(6):790-804. doi: 10.1123/jpah.6.6.790  
31 780  
32 781 82. Hlatky MA, Boineau RE, Higginbotham MB, et al. A brief self-administered questionnaire to  
33 782 determine functional capacity (the Duke Activity Status Index). *Am J Cardiol* 1989;64(10):651-  
34 783 4. doi: 10.1016/0002-9149(89)90496-7  
35 784  
36 785 83. Dillon CB, Fitzgerald AP, Kearney PM, et al. Number of Days Required to Estimate Habitual Activity  
37 786 Using Wrist-Worn GENEActiv Accelerometer: A Cross-Sectional Study. *PLOS ONE*  
38 787 2016;11(5):e0109913. doi: 10.1371/journal.pone.0109913  
39 788  
40 789 84. Moore CG, Carter RE, Nietert PJ, et al. Recommendations for Planning Pilot Studies in Clinical and  
41 790 Translational Research. *J Clin Transl Sci* 2011;4(5):332-37. doi: 10.1111/j.1752-  
42 791 8062.2011.00347.x  
43 792  
44 793 85. Sim J, Lewis M. The size of a pilot study for a clinical trial should be calculated in relation to  
45 794 considerations of precision and efficiency. *J Clin Epidemiol* 2012;65(3):301-8. doi:  
46 795 10.1016/j.jclinepi.2011.07.011  
47  
48  
49  
50  
51  
52  
53  
54  
55  
56  
57  
58  
59  
60

1  
2  
3 786 **Tables and Figures**

4  
5 787

6  
7 788 **See uploaded.**

8  
9 789 **Figure 1. ECSERT study flow diagram**

10  
11  
12  
13  
14  
15  
16  
17  
18  
19  
20  
21  
22  
23  
24  
25  
26  
27  
28  
29  
30  
31  
32  
33  
34  
35  
36  
37  
38  
39  
40  
41  
42  
43  
44  
45  
46  
47  
48  
49  
50  
51  
52  
53  
54  
55  
56  
57  
58  
59  
60

For peer review only

790

Table 1. ECSERT inclusion and exclusion criteria

| Inclusion Criteria                                                                                                                                                                                                                                                                                                                                                                                                                                                                                                            | Exclusion Criteria                                                                                                                                                                                                                                                                                                                                                                                                                                                                                                                           |
|-------------------------------------------------------------------------------------------------------------------------------------------------------------------------------------------------------------------------------------------------------------------------------------------------------------------------------------------------------------------------------------------------------------------------------------------------------------------------------------------------------------------------------|----------------------------------------------------------------------------------------------------------------------------------------------------------------------------------------------------------------------------------------------------------------------------------------------------------------------------------------------------------------------------------------------------------------------------------------------------------------------------------------------------------------------------------------------|
| RTRs                                                                                                                                                                                                                                                                                                                                                                                                                                                                                                                          |                                                                                                                                                                                                                                                                                                                                                                                                                                                                                                                                              |
| <ul style="list-style-type: none"> <li>• Prevalent KTR &gt;1 year</li> <li>• Male or female, aged &gt;18 years old</li> <li>• Willing and able to give informed consent for participation in the study</li> <li>• Increased cardiometabolic risk with at least one of:               <ul style="list-style-type: none"> <li>• Diabetes mellitus</li> <li>• Dyslipidaemia</li> <li>• Hypertension</li> <li>• Obesity (BMI &gt;30)</li> <li>• History of ischaemic heart disease/cerebrovascular disease</li> </ul> </li> </ul> | <ul style="list-style-type: none"> <li>• Inability to give informed consent or comply with testing and exercise protocol for any reason</li> <li>• Unable to undergo CMR scanning (incompatible implants, claustrophobia, allergy to agents etc.)</li> <li>• Female participants who are pregnant, lactating, or planning pregnancy during the course of the study</li> <li>• Scheduled elective surgery or other procedures requiring general anaesthesia during the study</li> <li>• Any other significant disease or disorder*</li> </ul> |
| Healthy controls                                                                                                                                                                                                                                                                                                                                                                                                                                                                                                              |                                                                                                                                                                                                                                                                                                                                                                                                                                                                                                                                              |
| <ul style="list-style-type: none"> <li>• Age &lt;18 years</li> <li>• No documented history of major cardiorespiratory chronic condition</li> <li>• None of the following cardiometabolic risk factors:               <ul style="list-style-type: none"> <li>• Diabetes mellitus</li> <li>• Dyslipidaemia</li> <li>• Hypertension</li> <li>• History of ischaemic heart disease/cerebrovascular disease</li> <li>• Obesity (BMI&gt;30)</li> </ul> </li> <li>• Not on any medication</li> </ul>                                 | <ul style="list-style-type: none"> <li>• Unable to undertake exercise testing due to physical or psychological barriers</li> <li>• Scheduled elective surgery or other procedures requiring general anaesthesia during the study</li> <li>• Inability to give informed consent or comply with testing and exercise protocol for any reason</li> <li>• Any other significant disease or disorder*</li> </ul>                                                                                                                                  |

\*i.e. significant co-morbidity including unstable hypertension, potentially lethal arrhythmia, myocardial infarction within 6 months, unstable angina, active liver disease, uncontrolled diabetes mellitus (HbA1c  $\geq$  9%), advanced cerebral or peripheral vascular disease which, in the opinion of the patient's own clinician, may either put the patient at risk because of participation in the study, or may influence the result of the study, or the patient's ability to participate in the study.

791

792

793

794

795

796

797

798



1  
2  
3 799 **Additional file details**  
4

5 800 File name: Additional File 1

6 801 File format: Additional File 1.pdf  
7

8 802 Title of data: Original ECSERT flow diagram (pre-COVID-19)  
9

10 803 Description of data: Flow diagram prior to COVID-19 amendments  
11

12 804  
13

14 805  
15

16 806  
17  
18  
19  
20  
21  
22  
23  
24  
25  
26  
27  
28  
29  
30  
31  
32  
33  
34  
35  
36  
37  
38  
39  
40  
41  
42  
43  
44  
45  
46  
47  
48  
49  
50  
51  
52  
53  
54  
55  
56  
57  
58  
59  
60

For peer review only

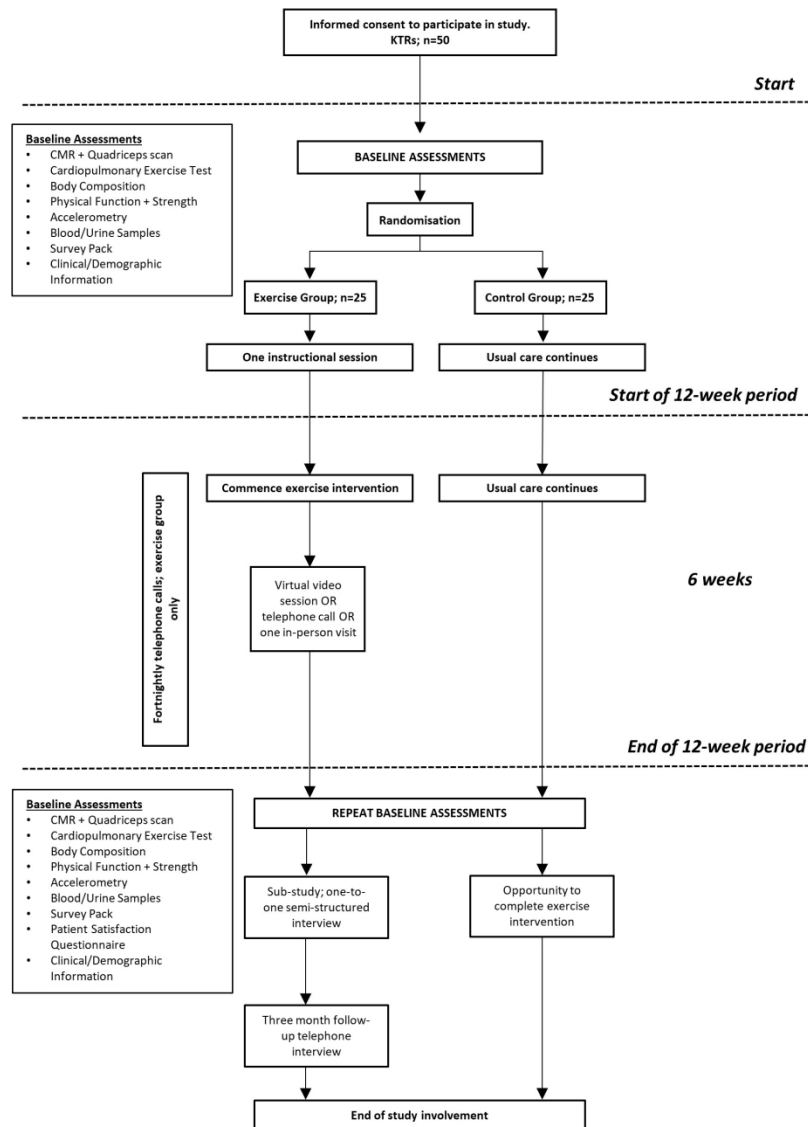

Figure 1 ECSERT Study Flow Diagram

170x219mm (300 x 300 DPI)

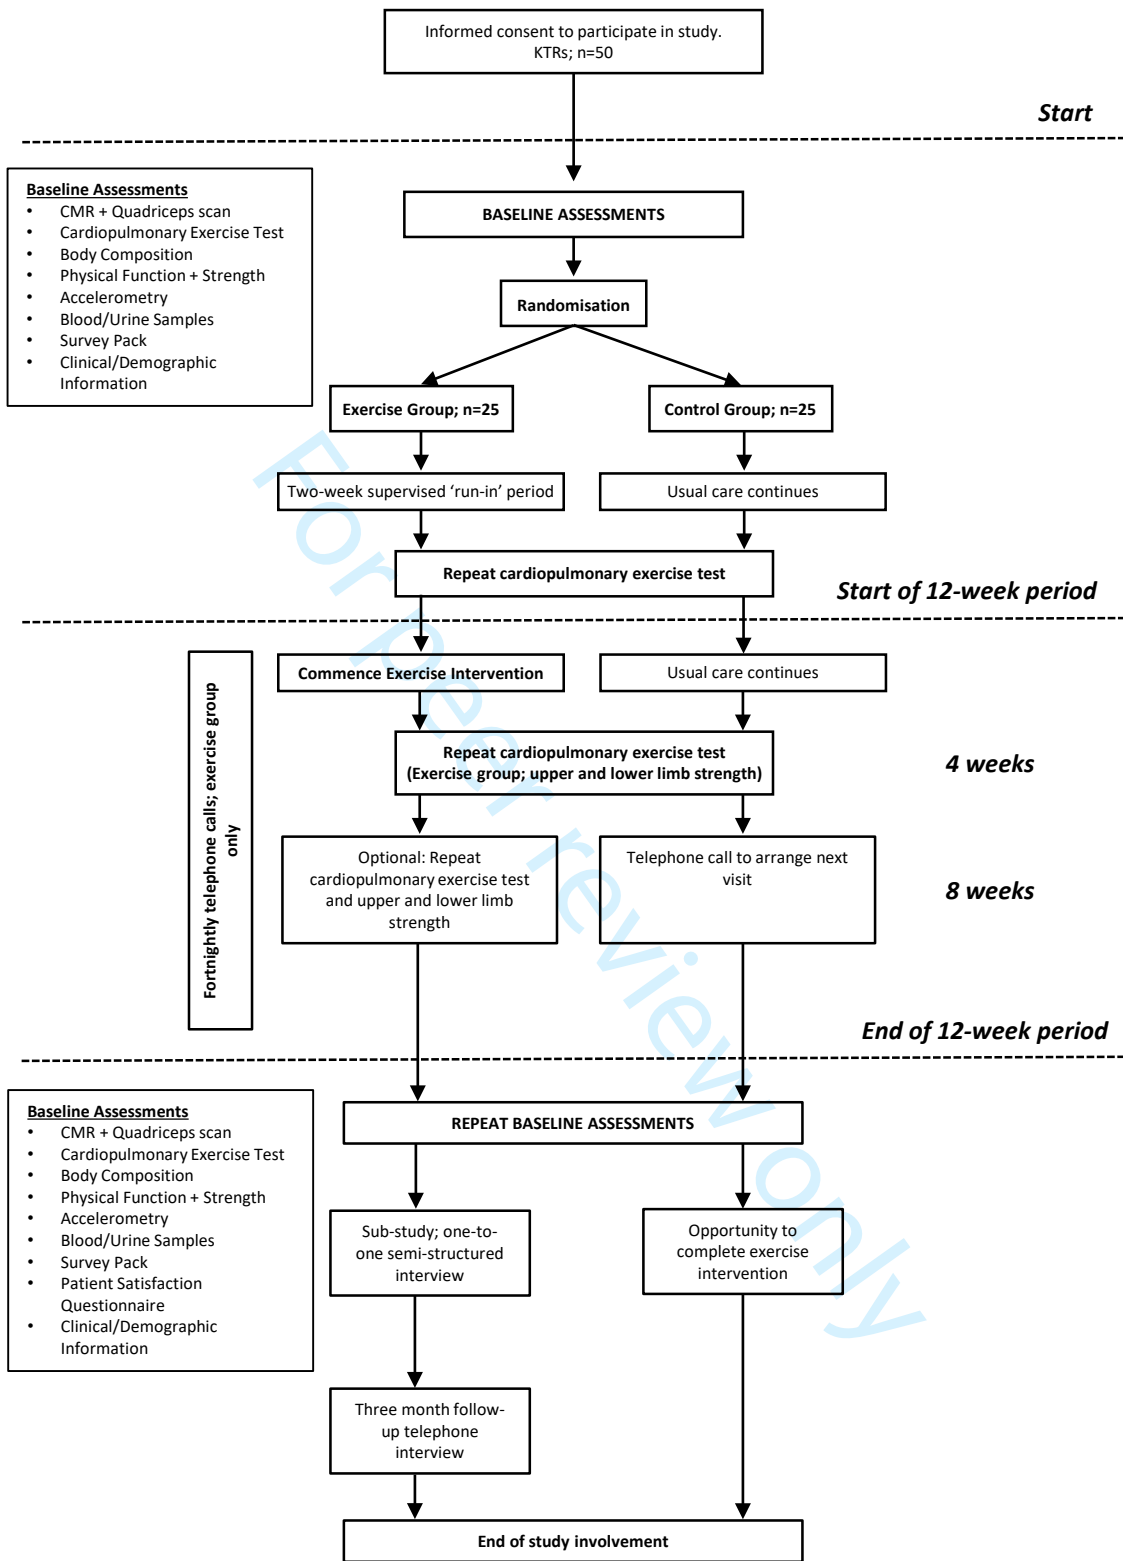

Figure X. Original ECSERT study flow diagram (pre-COVID-19)



STANDARD PROTOCOL ITEMS: RECOMMENDATIONS FOR INTERVENTIONAL TRIALS

SPIRIT 2013 Checklist: Recommended items to address in a clinical trial protocol and related documents\*

| Section/item                      | Item No | Description                                                                                                                                                                                                                                                                                                 |
|-----------------------------------|---------|-------------------------------------------------------------------------------------------------------------------------------------------------------------------------------------------------------------------------------------------------------------------------------------------------------------|
| <b>Administrative information</b> |         |                                                                                                                                                                                                                                                                                                             |
| Title                             | 1       | Descriptive title identifying the study design, population, interventions, and, if applicable, trial acronym (Page 1, lines 1-3)                                                                                                                                                                            |
| Trial registration                | 2a      | Trial identifier and registry name. If not yet registered, name of intended registry (Page 2, lines 67)                                                                                                                                                                                                     |
|                                   | 2b      | All items from the World Health Organization Trial Registration Data Set (Yes, throughout)                                                                                                                                                                                                                  |
| Protocol version                  | 3       | Date and version identifier (page 16, line 494)                                                                                                                                                                                                                                                             |
| Funding                           | 4       | Sources and types of financial, material, and other support (page 16, line 506 and page 16, lines 511-513)                                                                                                                                                                                                  |
| Roles and responsibilities        | 5a      | Names, affiliations, and roles of protocol contributors (page 1 and 15)                                                                                                                                                                                                                                     |
|                                   | 5b      | Name and contact information for the trial sponsor (page 16, line 488)                                                                                                                                                                                                                                      |
|                                   | 5c      | Role of study sponsor and funders, if any, in study design; collection, management, analysis, and interpretation of data; writing of the report; and the decision to submit the report for publication, including whether they will have ultimate authority over any of these activities (page 16, 506-509) |
|                                   | 5d      | Composition, roles, and responsibilities of the coordinating centre, steering committee, endpoint adjudication committee, data management team, and other individuals or groups overseeing the trial, if applicable (see Item 21a for data monitoring committee) N/A                                        |
| <b>Introduction</b>               |         |                                                                                                                                                                                                                                                                                                             |
| Background and rationale          | 6a      | Description of research question and justification for undertaking the trial, including summary of relevant studies (published and unpublished) examining benefits and harms for each intervention (Introduction, page 3)                                                                                   |
|                                   | 6b      | Explanation for choice of comparators (Introduction, page 3)                                                                                                                                                                                                                                                |
| Objectives                        | 7       | Specific objectives or hypotheses (Page 4)                                                                                                                                                                                                                                                                  |

1  
2  
3  
4  
5  
6  
7  
8  
9  
10  
11  
12  
13  
14  
15  
16  
17  
18  
19  
20  
21  
22  
23  
24  
25  
26  
27  
28  
29  
30  
31  
32  
33  
34  
35  
36  
37  
38  
39  
40  
41  
42  
43  
44  
45  
46  
47  
48  
49  
50  
51  
52  
53  
54  
55  
56  
57  
58  
59  
60

Trial design 8 Description of trial design including type of trial (eg, parallel group, crossover, factorial, single group), allocation ratio, and framework (eg, superiority, equivalence, noninferiority, exploratory) (Page 5)

### Methods: Participants, interventions, and outcomes

Study setting 9 Description of study settings (eg, community clinic, academic hospital) and list of countries where data will be collected. Reference to where list of study sites can be obtained (Page 5, line 141-143)

Eligibility criteria 10 Inclusion and exclusion criteria for participants. If applicable, eligibility criteria for study centres and individuals who will perform the interventions (eg, surgeons, psychotherapists) (Table 1)

Interventions 11a Interventions for each group with sufficient detail to allow replication, including how and when they will be administered (Page 5 and 6)

11b Criteria for discontinuing or modifying allocated interventions for a given trial participant (eg, drug dose change in response to harms, participant request, or improving/worsening disease) (Page 6, lines 176-178)

11c Strategies to improve adherence to intervention protocols, and any procedures for monitoring adherence (eg, drug tablet return, laboratory tests) (Page 10, lines 323-327)

11d Relevant concomitant care and interventions that are permitted or prohibited during the trial (Page 5, line 164)

Outcomes 12 Primary, secondary, and other outcomes, including the specific measurement variable (eg, systolic blood pressure), analysis metric (eg, change from baseline, final value, time to event), method of aggregation (eg, median, proportion), and time point for each outcome. Explanation of the clinical relevance of chosen efficacy and harm outcomes is strongly recommended (Study timeline, page 7)

Participant timeline 13 Time schedule of enrolment, interventions (including any run-ins and washouts), assessments, and visits for participants. A schematic diagram is highly recommended (see Figure) (Figure 1)

Sample size 14 Estimated number of participants needed to achieve study objectives and how it was determined, including clinical and statistical assumptions supporting any sample size calculations (Page 11, lines 346-348)

Recruitment 15 Strategies for achieving adequate participant enrolment to reach target sample size (Page 5, 140+)

### Methods: Assignment of interventions (for controlled trials)

Allocation:

|    |                                                           |     |                                                                         |
|----|-----------------------------------------------------------|-----|-------------------------------------------------------------------------|
| 1  |                                                           |     |                                                                         |
| 2  | Sequence                                                  | 16a | Method of generating the allocation sequence (eg, computer-             |
| 3  | generation                                                |     | generated random numbers), and list of any factors for stratification.  |
| 4  |                                                           |     | To reduce predictability of a random sequence, details of any           |
| 5  |                                                           |     | planned restriction (eg, blocking) should be provided in a separate     |
| 6  |                                                           |     | document that is unavailable to those who enrol participants or         |
| 7  |                                                           |     | assign interventions (Page 5, 154-159)                                  |
| 8  |                                                           |     |                                                                         |
| 9  |                                                           |     |                                                                         |
| 10 | Allocation                                                | 16b | Mechanism of implementing the allocation sequence (eg, central          |
| 11 | concealment                                               |     | telephone; sequentially numbered, opaque, sealed envelopes),            |
| 12 | mechanism                                                 |     | describing any steps to conceal the sequence until interventions are    |
| 13 |                                                           |     | assigned (Page 5, 154-159)                                              |
| 14 |                                                           |     |                                                                         |
| 15 | Implementatio                                             | 16c | Who will generate the allocation sequence, who will enrol               |
| 16 | n                                                         |     | participants, and who will assign participants to interventions (Page   |
| 17 |                                                           |     | 5, 158)                                                                 |
| 18 |                                                           |     |                                                                         |
| 19 |                                                           |     |                                                                         |
| 20 | Blinding                                                  | 17a | Who will be blinded after assignment to interventions (eg, trial        |
| 21 | (masking)                                                 |     | participants, care providers, outcome assessors, data analysts), and    |
| 22 |                                                           |     | how N/A                                                                 |
| 23 |                                                           |     |                                                                         |
| 24 |                                                           | 17b | If blinded, circumstances under which unblinding is permissible, and    |
| 25 |                                                           |     | procedure for revealing a participant's allocated intervention during   |
| 26 |                                                           |     | the trial N/A                                                           |
| 27 |                                                           |     |                                                                         |
| 28 |                                                           |     |                                                                         |
| 29 | <b>Methods: Data collection, management, and analysis</b> |     |                                                                         |
| 30 |                                                           |     |                                                                         |
| 31 | Data collection                                           | 18a | Plans for assessment and collection of outcome, baseline, and other     |
| 32 | methods                                                   |     | trial data, including any related processes to promote data quality     |
| 33 |                                                           |     | (eg, duplicate measurements, training of assessors) and a               |
| 34 |                                                           |     | description of study instruments (eg, questionnaires, laboratory tests) |
| 35 |                                                           |     | along with their reliability and validity, if known. Reference to where |
| 36 |                                                           |     | data collection forms can be found, if not in the protocol (Page 7-11)  |
| 37 |                                                           |     |                                                                         |
| 38 |                                                           |     |                                                                         |
| 39 |                                                           | 18b | Plans to promote participant retention and complete follow-up,          |
| 40 |                                                           |     | including list of any outcome data to be collected for participants who |
| 41 |                                                           |     | discontinue or deviate from intervention protocols (Page 11)            |
| 42 |                                                           |     |                                                                         |
| 43 | Data                                                      | 19  | Plans for data entry, coding, security, and storage, including any      |
| 44 | management                                                |     | related processes to promote data quality (eg, double data entry;       |
| 45 |                                                           |     | range checks for data values). Reference to where details of data       |
| 46 |                                                           |     | management procedures can be found, if not in the protocol (Page        |
| 47 |                                                           |     | 11, lines 349-                                                          |
| 48 |                                                           |     | 354)                                                                    |
| 49 |                                                           |     |                                                                         |
| 50 |                                                           |     |                                                                         |
| 51 | Statistical                                               | 20a | Statistical methods for analysing primary and secondary outcomes.       |
| 52 | methods                                                   |     | Reference to where other details of the statistical analysis plan can   |
| 53 |                                                           |     | be found, if not in the protocol (Page 11 and 12)                       |
| 54 |                                                           |     |                                                                         |
| 55 |                                                           | 20b | Methods for any additional analyses (eg, subgroup and adjusted          |
| 56 |                                                           |     | analyses) N/A                                                           |
| 57 |                                                           |     |                                                                         |
| 58 |                                                           |     |                                                                         |
| 59 |                                                           |     |                                                                         |
| 60 |                                                           |     |                                                                         |

1  
2 20c Definition of analysis population relating to protocol non-adherence  
3 (eg, as randomised analysis), and any statistical methods to handle  
4 missing data (eg, multiple imputation) (Page 12)  
5

## 6 **Methods: Monitoring**

7  
8 Data monitoring 21a Composition of data monitoring committee (DMC) or Data and Safety  
9 Monitoring Board (DCMB); summary of its role and reporting  
10 structure; statement of whether it is independent from the sponsor  
11 and competing interests; and reference to where further details about  
12 its charter can be found, if not in the protocol. Alternatively, an  
13 explanation of why a DMC is not needed  
14  
15

16  
17 A DSMB is indicated, from a practical perspective in the following  
18 circumstances:

- 19  
20  
21 1. If the trial is intended to provide definitive information about  
22 effectiveness and/or safety of a medical or bio-behavioral intervention  
23 2. If there are prior data to suggest that the intervention being studied has  
24 the potential to induce potentially unacceptable toxicity  
25 3. If the trial is evaluating mortality or another major endpoint, such that  
26 inferiority of one treatment arm has safety as well as effectiveness  
27 implications  
28 4. If it would ethically be important for the trial to stop early if the primary  
29 question addressed has been definitively answered, even if secondary  
30 questions or complete safety information were not yet fully addressed  
31

32  
33 The ECSERT study does not meet any of these criteria as a pilot/feasibility  
34 study

35 21b Description of any interim analyses and stopping guidelines,  
36 including who will have access to these interim results and make the  
37 final decision to terminate the trial N/A  
38

39  
40 Harms 22 Plans for collecting, assessing, reporting, and managing solicited and  
41 spontaneously reported adverse events and other unintended effects  
42 of trial interventions or trial conduct (Page 12, safety reporting)  
43

44 Auditing 23 Frequency and procedures for auditing trial conduct, if any, and  
45 whether the process will be independent from investigators and the  
46 sponsor N/A aside from usual sponsor audits  
47  
48

## 49 **Ethics and dissemination**

50  
51 Research ethics 24 Plans for seeking research ethics committee/institutional review  
52 approval board (REC/IRB) approval (Page 16, ethical issues)  
53

54 Protocol 25 Plans for communicating important protocol modifications (eg,  
55 amendments changes to eligibility criteria, outcomes, analyses) to relevant parties  
56 (eg, investigators, REC/IRBs, trial participants, trial registries,  
57 journals, regulators) (Page 16, ethical issues)  
58  
59  
60

|    |                   |     |                                                                           |
|----|-------------------|-----|---------------------------------------------------------------------------|
| 1  |                   |     |                                                                           |
| 2  | Consent or        | 26a | Who will obtain informed consent or assent from potential trial           |
| 3  | assent            |     | participants or authorised surrogates, and how (see Item 32) (page 5)     |
| 4  |                   |     |                                                                           |
| 5  |                   | 26b | Additional consent provisions for collection and use of participant       |
| 6  |                   |     | data and biological specimens in ancillary studies, if applicable         |
| 7  |                   |     | (consent form)                                                            |
| 8  |                   |     |                                                                           |
| 9  | Confidentiality   | 27  | How personal information about potential and enrolled participants        |
| 10 |                   |     | will be collected, shared, and maintained in order to protect             |
| 11 |                   |     | confidentiality before, during, and after the trial (Page 11)             |
| 12 |                   |     |                                                                           |
| 13 | Declaration of    | 28  | Financial and other competing interests for principal investigators for   |
| 14 | interests         |     | the overall trial and each study site (Page 16, line 515)                 |
| 15 |                   |     |                                                                           |
| 16 | Access to data    | 29  | Statement of who will have access to the final trial dataset, and         |
| 17 |                   |     | disclosure of contractual agreements that limit such access for           |
| 18 |                   |     | investigators (Page 17, availability of data)                             |
| 19 |                   |     |                                                                           |
| 20 |                   |     |                                                                           |
| 21 | Ancillary and     | 30  | Provisions, if any, for ancillary and post-trial care, and for            |
| 22 | post-trial care   |     | compensation to those who suffer harm from trial participation N/A        |
| 23 |                   |     |                                                                           |
| 24 | Dissemination     | 31a | Plans for investigators and sponsor to communicate trial results to       |
| 25 | policy            |     | participants, healthcare professionals, the public, and other relevant    |
| 26 |                   |     | groups (eg, via publication, reporting in results databases, or other     |
| 27 |                   |     | data sharing arrangements), including any publication restrictions        |
| 28 |                   |     | (Page 17, availability of data)                                           |
| 29 |                   |     |                                                                           |
| 30 |                   |     |                                                                           |
| 31 |                   |     |                                                                           |
| 32 |                   | 31b | Authorship eligibility guidelines and any intended use of professional    |
| 33 |                   |     | writers (Page 17, availability of data)                                   |
| 34 |                   |     |                                                                           |
| 35 |                   | 31c | Plans, if any, for granting public access to the full protocol,           |
| 36 |                   |     | participant-level dataset, and statistical code (Page 17, availability of |
| 37 |                   |     | data)                                                                     |
| 38 |                   |     |                                                                           |
| 39 |                   |     |                                                                           |
| 40 | <b>Appendices</b> |     |                                                                           |
| 41 |                   |     |                                                                           |
| 42 | Informed consent  | 32  | Model consent form and other related documentation given to               |
| 43 | materials         |     | participants and authorised surrogates Yes                                |
| 44 |                   |     |                                                                           |
| 45 | Biological        | 33  | Plans for collection, laboratory evaluation, and storage of biological    |
| 46 | specimens         |     | specimens for genetic or molecular analysis in the current trial and      |
| 47 |                   |     | for future use in ancillary studies, if applicable (Page 10)              |
| 48 |                   |     |                                                                           |

\*It is strongly recommended that this checklist be read in conjunction with the SPIRIT 2013 Explanation & Elaboration for important clarification on the items. Amendments to the protocol should be tracked and dated. The SPIRIT checklist is copyrighted by the SPIRIT Group under the Creative Commons "[Attribution-NonCommercial-NoDerivs 3.0 Unported](https://creativecommons.org/licenses/by-nc-nd/3.0/)" license.



# BMJ Open

## A pilot randomised controlled trial of a structured, home-based exercise program on cardiovascular structure and function in kidney transplant recipients: The ECSERT study design and methods

|                               |                                                                                                                                                                                                                                                                                                                                                                                                                                                                                                                                                                                                                                                                                                                                                                                                                                                                                                                                                                                                                                                                                                                                                                                                                                                                                                                                                                                                                                                                                                                                                                                                                                                                                                                                                                                                                                                                                                                                                                                                           |
|-------------------------------|-----------------------------------------------------------------------------------------------------------------------------------------------------------------------------------------------------------------------------------------------------------------------------------------------------------------------------------------------------------------------------------------------------------------------------------------------------------------------------------------------------------------------------------------------------------------------------------------------------------------------------------------------------------------------------------------------------------------------------------------------------------------------------------------------------------------------------------------------------------------------------------------------------------------------------------------------------------------------------------------------------------------------------------------------------------------------------------------------------------------------------------------------------------------------------------------------------------------------------------------------------------------------------------------------------------------------------------------------------------------------------------------------------------------------------------------------------------------------------------------------------------------------------------------------------------------------------------------------------------------------------------------------------------------------------------------------------------------------------------------------------------------------------------------------------------------------------------------------------------------------------------------------------------------------------------------------------------------------------------------------------------|
| Journal:                      | <i>BMJ Open</i>                                                                                                                                                                                                                                                                                                                                                                                                                                                                                                                                                                                                                                                                                                                                                                                                                                                                                                                                                                                                                                                                                                                                                                                                                                                                                                                                                                                                                                                                                                                                                                                                                                                                                                                                                                                                                                                                                                                                                                                           |
| Manuscript ID                 | bmjopen-2020-046945.R2                                                                                                                                                                                                                                                                                                                                                                                                                                                                                                                                                                                                                                                                                                                                                                                                                                                                                                                                                                                                                                                                                                                                                                                                                                                                                                                                                                                                                                                                                                                                                                                                                                                                                                                                                                                                                                                                                                                                                                                    |
| Article Type:                 | Protocol                                                                                                                                                                                                                                                                                                                                                                                                                                                                                                                                                                                                                                                                                                                                                                                                                                                                                                                                                                                                                                                                                                                                                                                                                                                                                                                                                                                                                                                                                                                                                                                                                                                                                                                                                                                                                                                                                                                                                                                                  |
| Date Submitted by the Author: | 05-Aug-2021                                                                                                                                                                                                                                                                                                                                                                                                                                                                                                                                                                                                                                                                                                                                                                                                                                                                                                                                                                                                                                                                                                                                                                                                                                                                                                                                                                                                                                                                                                                                                                                                                                                                                                                                                                                                                                                                                                                                                                                               |
| Complete List of Authors:     | <p>Billany, Roseanne; University of Leicester, Department of Cardiovascular Sciences; University Hospitals of Leicester NHS Trust, John Walls Renal Unit</p> <p>Vadaszy, Noemi; University of Leicester, Department of Health Sciences Bishop , Nicolette ; Loughborough University, School of Sport, Exercise and Health Sciences</p> <p>Wilkinson, Thomas ; University of Leicester, Department of Health Sciences</p> <p>Adenwalla, Sherna; University of Leicester, Department of Cardiovascular Sciences; University Hospitals of Leicester NHS Trust, John Walls Renal Unit</p> <p>Robinson, Katherine; University of Leicester, Department of Cardiovascular Sciences</p> <p>Croker , Kathryn; University Hospitals of Leicester NHS Trust, John Walls Renal Unit</p> <p>Brady, Emer; University of Leicester, Department of Cardiovascular Sciences</p> <p>Wormleighton, Joanne; University Hospitals of Leicester NHS Trust, Department of Radiology</p> <p>Parke, Kelly; University of Leicester, Department of Cardiovascular Sciences; University Hospitals of Leicester NHS Trust, Department of Radiology</p> <p>Cooper, Nicola; University of Leicester, Department of Health Sciences</p> <p>Webster, Angela; The University of Sydney, School of Public Health; Westmead Hospital, Centre for Renal and Transplant Research</p> <p>Barratt, Jonathan; University of Leicester, Department of Cardiovascular Sciences; University Hospitals of Leicester NHS Trust, John Walls Renal Unit</p> <p>McCann, Gerry; University of Leicester, Department of Cardiovascular Sciences</p> <p>Burton, James; University of Leicester, Department of Cardiovascular Sciences; University Hospitals of Leicester NHS Trust, John Walls Renal Unit</p> <p>Smith, Alice; University of Leicester, Department of Health Sciences</p> <p>Graham-Brown, Matthew ; University of Leicester, Department of Cardiovascular Sciences; University Hospitals of Leicester NHS Trust, John Walls Renal Unit</p> |

1  
2  
3  
4  
5  
6  
7  
8  
9  
10  
11  
12  
13  
14  
15  
16  
17  
18  
19  
20  
21  
22  
23  
24  
25  
26  
27  
28  
29  
30  
31  
32  
33  
34  
35  
36  
37  
38  
39  
40  
41  
42  
43  
44  
45  
46  
47  
48  
49  
50  
51  
52  
53  
54  
55  
56  
57  
58  
59  
60

|                                    |                                                               |
|------------------------------------|---------------------------------------------------------------|
| <b>Primary Subject Heading</b> :   | Renal medicine                                                |
| <b>Secondary Subject Heading</b> : | Rehabilitation medicine, Cardiovascular medicine              |
| <b>Keywords</b> :                  | Renal transplantation < NEPHROLOGY, CARDIOLOGY, PUBLIC HEALTH |
|                                    |                                                               |

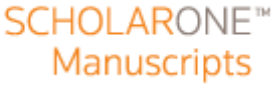



I, the Submitting Author has the right to grant and does grant on behalf of all authors of the Work (as defined in the below author licence), an exclusive licence and/or a non-exclusive licence for contributions from authors who are: i) UK Crown employees; ii) where BMJ has agreed a CC-BY licence shall apply, and/or iii) in accordance with the terms applicable for US Federal Government officers or employees acting as part of their official duties; on a worldwide, perpetual, irrevocable, royalty-free basis to BMJ Publishing Group Ltd ("BMJ") its licensees and where the relevant Journal is co-owned by BMJ to the co-owners of the Journal, to publish the Work in this journal and any other BMJ products and to exploit all rights, as set out in our [licence](#).

The Submitting Author accepts and understands that any supply made under these terms is made by BMJ to the Submitting Author unless you are acting as an employee on behalf of your employer or a postgraduate student of an affiliated institution which is paying any applicable article publishing charge ("APC") for Open Access articles. Where the Submitting Author wishes to make the Work available on an Open Access basis (and intends to pay the relevant APC), the terms of reuse of such Open Access shall be governed by a Creative Commons licence – details of these licences and which [Creative Commons](#) licence will apply to this Work are set out in our licence referred to above.

Other than as permitted in any relevant BMJ Author's Self Archiving Policies, I confirm this Work has not been accepted for publication elsewhere, is not being considered for publication elsewhere and does not duplicate material already published. I confirm all authors consent to publication of this Work and authorise the granting of this licence.

1  
2  
3 1 **A pilot randomised controlled trial of a structured, home-based exercise program on**  
4 **cardiovascular structure and function in kidney transplant recipients: The ECSERT study**  
5 **design and methods**  
6  
7  
8  
9

10 Roseanne E Billany<sup>1,2</sup>, Noemi Vadaszy<sup>3</sup>, Nicolette C Bishop<sup>4</sup>, Thomas J Wilkinson<sup>3</sup>, Sherna F  
11 Adenwalla<sup>1,2</sup>, Katherine A Robinson<sup>1</sup>, Kathryn Croker<sup>2</sup>, Emer M Brady<sup>1</sup>, Joanne Wormleighton<sup>5</sup>, Kelly  
12 Parke<sup>1,5</sup>, Nicola J Cooper<sup>3</sup>, Angela C Webster<sup>6</sup>, Jonathan Barratt<sup>1,2</sup>, Gerry P McCann<sup>1</sup>, James O  
13 Burton<sup>1,2,5</sup>, Alice C Smith<sup>3</sup>, Matthew PM Graham-Brown<sup>1,2</sup>  
14  
15  
16  
17

18  
19 <sup>1</sup> Department of Cardiovascular Sciences, University of Leicester, Leicester, UK

20 <sup>2</sup> John Walls Renal Unit, University Hospitals of Leicester NHS Trust, Leicester, UK

21 <sup>3</sup> Department of Health Sciences, University of Leicester, Leicester, UK

22 <sup>4</sup> School of Sport, Exercise and Health Sciences, Loughborough University, Loughborough, UK

23 <sup>5</sup> Department of Radiology, University Hospitals of Leicester NHS Trust, Leicester, UK

24 <sup>6</sup> Sydney School of Public Health, University of Sydney, Sydney, NSW, Australia; Centre for Renal and  
25 Transplant Research, Westmead Hospital, Sydney, NSW, Australia.  
26  
27  
28  
29  
30  
31

32  
33  
34 **Corresponding author:**

35 Dr Matthew Graham-Brown

36 Department of Cardiovascular Sciences

37 University of Leicester

38 Leicester

39 United Kingdom

40 mgb23@leicester.ac.uk  
41  
42  
43  
44  
45  
46

47 **Keywords:** kidney transplantation, home-based exercise, cardiovascular disease, feasibility, cardiac  
48 MRI  
49  
50  
51

52 **Abstract:** 300

53 **Word count:** 4402  
54  
55  
56  
57  
58  
59  
60

1  
2  
3 35 **ABSTRACT**  
4  
5 36

6 37 **Background:** Cardiovascular disease (CVD) is a major cause of morbidity and mortality in kidney  
7  
8 38 transplant recipients (KTRs). CVD risk scores underestimate risk in this population as CVD is driven by  
9  
10 39 clustering of traditional and non-traditional risk factors, which lead to prognostic pathological changes  
11  
12 40 in cardiovascular structure and function. Whilst exercise may mitigate CVD in this population,  
13  
14 41 evidence is limited, and physical activity levels and patient activation towards exercise and self-  
15  
16 42 management are low. This pilot study will assess the feasibility of delivering a structured, home-based  
17  
18 43 exercise intervention in a population of KTRs at increased cardiometabolic risk and evaluate the  
19  
20 44 putative effects on cardiovascular structural and functional changes, cardiorespiratory fitness, quality  
21  
22 45 of life, patient activation, healthcare utilisation, and engagement with the prescribed exercise  
23  
24 46 program.  
25

26 47  
27 48 **Methods and analysis:** Fifty KTRs will be randomised 1:1 to: (1) the intervention; a 12-week home-  
28  
29 49 based combined resistance and aerobic exercise intervention or; (2) the control; usual care.  
30  
31 50 Intervention participants will have one introductory session for instruction and practice of the  
32  
33 51 recommended exercises prior to receiving an exercise diary, dumbbells, resistance bands, and access  
34  
35 52 to instructional videos. The study will evaluate the feasibility of recruitment, randomisation, retention,  
36  
37 53 assessment procedures, and the intervention implementation. Outcomes, to be assessed prior to  
38  
39 54 randomisation and post-intervention, include: cardiac structure and function with stress-perfusion  
40  
41 55 cardiac magnetic resonance imaging, cardiorespiratory fitness, physical function, blood biomarkers of  
42  
43 56 cardiometabolic health, quality of life, and patient activation. These data will be used to inform the  
44  
45 57 power calculations for future definitive trials.  
46  
47 58

48 59 **Ethics and dissemination:** The protocol was reviewed and given favourable opinion by the East  
49  
50 60 Midlands-Nottingham 2 research ethics committee (ref 19/EM/0209; 14/10/2019). Results will be  
51  
52 61 published in peer-reviewed academic journals and will be disseminated to the patient and public  
53  
54 62 community via social media, newsletter articles, and presentations at conferences.  
55  
56 63

57 64 **Trial registration number:** NCT04123951; prospectively registered.  
58  
59 65  
60 66

1  
2  
3 67 **ARTICLE SUMMARY**

4  
5 68 **Strengths and limitations of this study:**

6 69

- 7  
8 70
- Data on the effects of exercise interventions on the cardiac structural and functional aspects of CVD in this population are lacking and baseline values of multiparametric cardiac magnetic resonance imaging in KTRs are previously undefined.
- 9 71  
10 72  
11 73
- This study uses a novel home-based exercise intervention with the potential to translate into a widespread, low-resource intervention compared to in-centre, supervised interventions that are costly and labour intensive.
- 12 74  
13 75  
14 76
- As it can be difficult to ensure control groups are not influenced to change their lifestyle as a result of being part of the study; control participants will be offered the intervention after completion of the study.
- 15 77  
16 78  
17 79
- This study will provide quantitative and qualitative feasibility and pilot data to inform a definitive randomised controlled trial that will explore longer-term engendered lifestyle change in this population in response to a complex, home-based, lifestyle intervention.
- 18 80  
19 81  
20 82
- Secondary outcome analysis will identify the putative cardiometabolic and muscular effects of the intervention, although these results would need confirming in adequately powered studies due to the small sample size of this pilot study.
- 21 83  
22 84  
23 85

## 86 BACKGROUND

87 Kidney transplantation is the preferred modality of renal replacement therapy for patients with end  
88 stage kidney disease (ESKD). Although kidney transplantation confers a significant survival advantage  
89 over remaining on dialysis,<sup>1</sup> cardiovascular disease (CVD) is a leading cause of morbidity, mortality,  
90 and graft loss.<sup>2-4</sup> Since 2015, mortality rates attributed to CVD have been rising.<sup>4</sup> Cardiovascular  
91 disease in kidney transplant recipients (KTRs) associates with traditional cardiometabolic risk factors,<sup>3</sup>  
92 <sup>5 6</sup> which drive classical atheromatous coronary artery disease, and non-traditional risk factors  
93 resulting in pathological changes in cardiovascular structure and function that associate with  
94 mortality.<sup>7</sup> Immunosuppressive agents are well known to drive traditional<sup>3</sup> and non-traditional  
95 cardiometabolic risk factors.<sup>8 9</sup> Non-traditional cardiometabolic risk factors, including endothelial  
96 dysfunction, systemic inflammation, acute rejection, anaemia, and deranged bone-mineral  
97 metabolism,<sup>10-12</sup> are of at least equal importance in the pathogenesis of CVD in KTRs.<sup>7</sup> This is further  
98 illustrated by the fact that traditional CVD risk-stratification tools dramatically underestimate  
99 cardiovascular risk in patients with chronic kidney disease (CKD);<sup>11 13-15</sup> coronary revascularisation does  
100 not improve outcomes for KTRs as it does in the general population<sup>12</sup> and cardiac events are more  
101 likely to be fatal in KTRs.<sup>16</sup>

102 Chronic kidney disease-related cardiomyopathy, which has been termed “Uremic Cardiomyopathy”,  
103 is characterised by stereotypical changes in the cardiovascular structure and function of the heart such  
104 as left ventricular hypertrophy (LVH), left ventricular dilatation, left ventricular systolic dysfunction,<sup>17</sup>  
105 myocardial fibrosis,<sup>18</sup> and aortic stiffness<sup>19</sup>; all of which relate to poor cardiovascular outcomes.<sup>20 21</sup>  
106 Although structural and functional improvements of the heart and vessels have been seen post-  
107 transplantation in some studies,<sup>22</sup> others have shown no regression<sup>23</sup> and parameters such as LVH are  
108 independent factors for cardiac failure and mortality in KTRs.<sup>15</sup> Cardiac magnetic resonance imaging  
109 (CMR) is the gold-standard for assessment of ventricular structure and function and we have shown  
110 methods for assessment of tissue characterisation, aortopathy, and sub-clinical systolic and diastolic  
111 function to be reproducible in patients with kidney disease,<sup>24-26</sup> making CMR the ideal imaging  
112 modality for assessing multiple aspects of prognostically relevant measures of CVD in clinical studies.

113 Numerous epidemiological studies have observed the association between low levels of physical  
114 activity and increased prevalence of CVD risk factors,<sup>27-29</sup> and an inverse relationship between physical  
115 activity and all-cause and CVD mortality.<sup>30 31</sup> Physical activity levels in KTRs are lower than the general  
116 population,<sup>32-34</sup> with only 27% classified as meeting the UK national recommended physical activity  
117 levels.<sup>35</sup> Whilst physical activity levels improve in the year following transplantation, they plateau after  
118 one-year.<sup>33</sup> In the general population, lifestyle changes that increase physical activity through  
119 structured exercise lower mortality.<sup>36 37</sup> Despite this evidence, there is a lack of rigorous research into

1  
2  
3 120 the role of increased physical activity in mitigating cardiovascular risk in KTRs.<sup>38</sup> Recent consensus  
4 121 recommendations from experts and stakeholders highlighted the need for a priority research agenda  
5 122 in exercise for solid organ transplant recipients (SOTRs) to improve cardiovascular outcomes in this  
6 123 patient population.<sup>39</sup> Whilst supervised exercise interventions in KTRs improve cardiorespiratory  
7 124 fitness and a variety of traditional and non-traditional risk factors for CVD, including metabolic  
8 125 profile,<sup>40-42</sup> strength,<sup>43</sup> vascular stiffening,<sup>41</sup> weight,<sup>44</sup> and inflammation,<sup>45</sup> they are not realistically  
9 126 deliverable in the current financial climate and have not translated to clinical practice. Furthermore,  
10 127 exercise habits following in-centre supervised programs are not maintained<sup>46-48</sup> which can be  
11 128 potentially attributed to low levels of patient activation (a measure of a person's skills, confidence,  
12 129 and knowledge to manage their own health) and a failure for such programs to engender sustained  
13 130 lifestyle changes.<sup>49 50</sup> Home-based exercise training programs have been shown to be deliverable in  
14 131 patients on dialysis and patients undergoing cardiac rehabilitation,<sup>51-54</sup> but the effectiveness and  
15 132 deliverability of home-based exercise interventions are largely untested in KTRs. It cannot be assumed  
16 133 that such programs will be acceptable to KTRs, whose home-lives, social and occupational  
17 134 circumstances are significantly different to dialysis and cardiac patients. Many KTRs have had enforced  
18 135 sedentary lifestyles prior to transplantation as dialysis patients and their goals for rehabilitation as  
19 136 well as the disease processes at work may be different.<sup>55 56</sup>

### 137 **Objectives**

138 The aims of this study are to evaluate the impact of a 12-week, home-based exercise intervention in  
139 KTRs with increased cardiometabolic risk, specifically addressing:

- 140 1. The deliverability and feasibility of the home-based exercise intervention in KTRs, defining  
141 recruitment, retention, compliance, and adverse events;
- 142 2. Potential cardiovascular structural and functional parameters measured using stress-  
143 perfusion CMR;
- 144 3. Cardiorespiratory fitness and strength;
- 145 4. Biochemical markers of cardiometabolic health, body composition, physical function, and  
146 quality of life;
- 147 5. Patient activation and continued adherence to the prescribed home-based exercise program.

148 Two sub-studies will assess:

- 149 1. The acceptability of the intervention through qualitative semi-structured interviews post-  
150 intervention.
- 151 2. The differences between cardiorespiratory fitness in 'healthy controls' without a kidney  
152 transplant versus KTRs.



1  
2  
3 153  
45 154 **METHODS AND ANALYSIS**6  
7 155 **ECSERT trial design**8  
9  
10 156 This study is a prospective, randomised, open-label, blinded endpoint (PROBE) pilot study. The study  
11 157 flowchart is presented in Figure 1.  
1213 158 **Participant identification and recruitment**14  
15 159 Fifty KTRs with a stable kidney transplant of >1 year will be recruited from University Hospitals of  
16 160 Leicester NHS Trust (UHL) kidney transplant outpatient clinic lists. There are approximately 400-420  
17 161 KTRs registered in UHL kidney transplant outpatient clinics. Full lists of inclusion and exclusion criteria  
18 162 for KTRs are included in Table 1. Patients will be screened by a clinician for eligibility to enter the study.  
19 163 Eligible patients will be approached (via telephone, post, or during their routine clinical appointment)  
20 164 and will be provided with verbal and written study information and time to consider without further  
21 165 contact (at least 24 h). Additionally, eligible patients who have given prior consent to be contacted  
22 166 regarding research opportunities will be contacted via post. All patients will be given the opportunity  
23 167 to discuss the study in more detail and to consider their participation. Consent will be performed by  
24 168 the Chief Investigator (MBG) according to the rules of good clinical practice. Inclusion and exclusion  
25 169 criteria for healthy controls is included within Table 1.  
26  
27  
28  
29  
30  
31  
32  
3334 170 **Randomisation**35  
36 171 Following baseline assessment, participants will be randomly allocated (1:1) to either; (1) a 12-week  
37 172 home-based combined resistance and aerobic exercise intervention (n=25) or; (2) control (n=25;  
38 173 receiving usual care). Randomisation will be blocked (using computer-generated random permuted  
39 174 blocks with allocation concealment; <https://www.sealedenvelope.com/simple-randomiser/v1/>) to  
40 175 ensure periodic balancing. The Clinical Trials Facilitator will perform the randomisation. Given the  
41 176 nature of the intervention, it is not possible for the participants to be blinded to their allocation.  
42  
43  
44  
45  
4647 177 **Intervention and comparator arms**48  
49 178 Intervention Group: 12-week home-based combined aerobic and resistance training50  
51 179 The 12-week, home-based, structured exercise program includes aerobic and resistance training (4-5  
52 180 sessions in total per week). Participants will be advised to complete a warm-up and cool-down prior  
53 181 to and following each session, respectively. Participants will continue to receive usual clinical care.  
54  
55  
5657 182 *Aerobic component*  
58  
59  
60

1  
2  
3 183 The aerobic component of the intervention will be walking, jogging, cycling, or similar, depending on  
4  
5 184 resources available and participant preference. Participants will be asked to complete 2-3 sessions per  
6  
7 185 week using a rating of perceived of exertion (RPE)<sup>57</sup> of 13-15 (somewhat hard) for 20-30 min. RPE will  
8  
9 186 be collected throughout cardiopulmonary exercise tests (CPET) and participants will be educated on  
10  
11 187 its use during the instructional session(s). RPE will be utilised rather than heart rate for two reasons:  
12  
13 188 (1) Many patients are on medication which impacts heart rate (e.g. beta-blockers). We therefore  
14  
15 189 cannot ascertain a true maximal heart rate from the exercise test in order for them to safely (and  
16  
17 190 reliably) monitor intensity this way without supervision. (2) This is a pragmatic decision based on the  
18  
19 191 potential for translation into low-cost future studies and clinical practice. However, should  
20  
21 192 participants in the trial already own a smart watch or heart rate monitor, we would not discourage  
22  
23 193 them from using it if they desire.

#### 24 194 *Resistance component*

25 195 The resistance component of the exercise intervention will include a combination of 6-8 exercises per  
26  
27 196 session chosen by the participant from a pool of twelve exercises (to provide variety) targeting upper  
28  
29 197 and lower body and core muscle groups, using free weights and/or resistance bands. The chosen pool  
30  
31 198 of exercises include: squat, hip abduction, lunge, calf-raise, side-lunge, bicep-curl, bent-over row,  
32  
33 199 reverse-fly, lateral-raise, chest-press, side-bends, and standing trunk rotation. Each exercise has  
34  
35 200 modifications for different abilities and may be pragmatically adjusted or changed throughout the  
36  
37 201 study as required. These exercises were chosen based on their ability to be modified, their subjective  
38  
39 202 difficulty, and their safety when being performed by participants new to exercise in an unsupervised  
40  
41 203 environment. Participants will aim to complete 6-8 resistance exercises twice a week (but not on  
42  
43 204 consecutive days to allow appropriate recovery). Initially they will be advised to complete 1-2 sets of  
44  
45 205 10 repetitions (at approximately 60% of estimated 1 repetition maximum (RM)<sup>58</sup>), gradually increasing  
46  
47 206 to 3-6 sets of 10 repetitions over the study period with a minimum of 30 sec rest between sets. The  
48  
49 207 1RM will be determined after randomisation by an exercise physiologist. These figures may be  
50  
51 208 adjusted to accommodate different abilities and different rates of progression. Where equipment is  
52  
53 209 limited (e.g. participants reach the highest provided dumbbell weight), participants will be advised to  
54  
55 210 increase the number of sets performed. The load chosen was based on previous research which  
56  
57 211 suggests whilst heavier loads (>60% of 1RM) are favoured for increasing strength, the effect size is still  
58  
59 212 large for lighter loads (<60% of 1RM) and both are effective for increasing muscle size.<sup>59</sup> It is important  
60  
213 not to discourage inactive or inexperienced participants with very heavy loads. Participants will be  
214  
215 provided with an exercise diary which includes additional instructions, dumbbells and resistance  
216  
bands, and access to educational and instructional videos. Instructional videos will include: the  
importance of an active and healthy lifestyle, the importance of warming up and cooling down and

217 how to do it, a reminder of how to use the RPE scale, demonstrations of each resistance exercise, and  
218 information about the aerobic component (videos can be viewed here:  
219 [https://www.youtube.com/playlist?list=PLwbE3AF9Ej\\_Vul5uoiF-C9Cl8wrgKz5Nv](https://www.youtube.com/playlist?list=PLwbE3AF9Ej_Vul5uoiF-C9Cl8wrgKz5Nv)). Participants will  
220 receive a telephone call from a member of the research team every two weeks in order to discuss  
221 progression of the exercise and address any issues that may arise. Participants will also be able to  
222 contact the research team at time should they require and will continue to attend any scheduled clinic  
223 appointments and take prescribed medication as normal.

#### 224 Control group: 'Usual care'

225 Participants in the control group will be asked to maintain their current lifestyle and exercise habits  
226 throughout the study. This includes continuing to attend any scheduled clinic appointments and taking  
227 prescribed medication as normal. As part of routine care, KTRs are recommended to take regular  
228 exercise and maintain a healthy lifestyle. This advice will be reiterated to patients in the control group  
229 to ensure the intervention is being appropriately compared to best-practice standard care.  
230 Participants will be asked to complete a 'control diary' to note any exercise, medication changes,  
231 illness, and other relevant information. Once control participants complete the post-intervention  
232 assessments, they will be offered the opportunity to complete the same intervention as the exercise  
233 group.

#### 234 Study timeline

##### 235 **Baseline assessments**

236 The ECSERT study timeline is shown in Figure 1. Baseline assessments described below will be carried  
237 out on the same day and in conjunction with routine clinical appointments to prevent additional  
238 travel.

##### 239 *Collection of routine clinical information and cost-effectiveness*

240 Clinical information will be extracted from the medical notes including: age, gender, ethnicity, primary  
241 cause of kidney failure, transplant type, transplant vintage, dialysis duration, comorbidities,  
242 blood/urine results, current medication, and smoking habits. This information will be used to primarily  
243 capture cofounding variables and during analyses of differences and similarities between groups.

244 A questionnaire will be administered at baseline to capture the previous 3 months of self-reported  
245 healthcare utilisation including: inpatient and outpatient appointments, emergency care, community  
246 and primary care services, support services, and changes in medications. This will be compared to data  
247 gathered from healthcare records allowing validation of the questionnaire for future cost-  
248 effectiveness analyses.

### 249 *Cardiac stress MRI*

250 All participants will undergo a comprehensive adenosine-stress perfusion CMR scans at baseline and  
251 on study-completion. Participants will be scanned on a 3T platform (Skyra, Siemens Medical Imaging,  
252 Erlangen, Germany) with an 18-channel phased-array receiver coil. New-generation gadolinium-based  
253 contrast agent with a licence for use in patients with an eGFR >30 ml/min/1.73 m<sup>2</sup> will be given for  
254 perfusion and delayed enhancement imaging. Patients with an eGFR <40 ml/min/1.73 m<sup>2</sup> will undergo  
255 non-contrast CMR scanning without gadolinium. Scans will quantitatively define:

- 256 • Left and right-ventricular structure and function (left ventricular mass, left and right  
257 ventricular volumes and ejection fractions);<sup>60</sup>
- 258 • Tissue-characterisation with native and post-contrast T1 mapping and delayed gadolinium  
259 enhancement;<sup>61-63</sup>
- 260 • Myocardial systolic-strain and peak early-diastolic strain rate;<sup>26</sup>
- 261 • Quantitative perfusion imaging (coronary blood-flow to quantify coronary reserve and  
262 ischaemia);<sup>64</sup>
- 263 • Aortic distensibility.<sup>24</sup>

### 264 *Quadriceps MRI*

265 At the end of the CMR scan, participants will immediately undergo an MRI scan of the quadriceps  
266 muscle in their right leg to assess muscle size (volume) as previously described<sup>65</sup>

### 267 *Cardiopulmonary exercise test*

268 A CPET utilising a standardised ramp protocol will be performed on a stationary electronically braked  
269 cycle ergometer (Lode Excalibur Sport, Groningen, Netherlands) with increasing workload (1 watt (W)  
270 every 4 sec (10-15 w/min)) ensuring volitional exhaustion within 12-15 min<sup>66</sup>. Participants will be  
271 encouraged to cycle at a continuous cadence (~70 rpm). The highest oxygen uptake will be measured  
272 ( $\dot{V}O_{2peak}$ ) using a simultaneous gas analyser (Metalyser 3B CPX System, CORTEX, Germany) as true  
273 maximal (plateau)  $\dot{V}O_2$  ( $\dot{V}O_{2max}$ ) is less commonly achieved in deconditioned and/or clinical patients.  
274 Test data will be considered usable if respiratory exchange ratio is  $\geq 1.00$  and RPE is  $\geq 18$ . The test will  
275 be in the presence of a cardiac nurse to confirm safety to commence exercise training. Blood pressure  
276 will be assessed at baseline and every two minutes throughout the test. A continuous 12-lead  
277 electrocardiogram (ECG) will be monitored throughout. A non-invasive monitor (Moxy, Fortiori Design  
278 LLC., Minnesota, USA) will be worn on the quadriceps muscle which uses near infrared spectroscopy  
279 (NIRS) to measure local oxygen saturation ( $SmO_2$ ) and total haemoglobin (THb) of the muscle.

### 280 *Lower limb Strength and muscular endurance*

1  
2  
3 281 Isometric and isokinetic muscle (knee extension) strength, of the dominant leg, will be assessed using  
4  
5 282 a dynamometer (Biodex System 4, Biodex Medical Systems Inc., New York, USA).<sup>67</sup> Peak isometric  
6  
7 283 strength (torque, Nm) will be assessed from three repetitions of maximum effort at 90° knee flexion  
8  
9 284 for ~3-5 sec with 60 sec rest. Isokinetic strength will be assessed at three speeds for one set of five  
10  
11 285 repetitions at each speed: 60°/sec, 90°/sec, and 120°/sec. Participants will perform a 'sit-to-stand-60'  
12  
13 286 (STS-60) test measuring how many sit-to-stand cycles can be performed over 60 seconds to assess  
14  
15 287 lower limb muscular endurance.<sup>68</sup>

#### 15 288 *Handgrip strength*

16  
17  
18 289 Peak grip strength of the left and right hands will be assessed with a hand dynamometer (Jamar Plus+;  
19  
20 290 Sammons Preston, Bolingbrook, IL). Each hand will be alternatively tested for three attempts each and  
21  
22 291 the highest value on each hand will be recorded.<sup>69</sup>

#### 23 292 *Gait speed*

24  
25 293 A 4 m walk test will be used to assess gait speed. Participants will be asked to walk 4 m at their 'usual  
26  
27 294 walking pace' for one practice and two, timed trials. The average score (m/sec) of the timed trials will  
28  
29 295 be recorded.

#### 30 296 *Functional mobility*

31  
32  
33 297 The 'timed-up-and-go' test (TUAG) will be used to assess functional mobility.<sup>70 71</sup> The participant is  
34  
35 298 timed whilst rising from the seated position on a chair, walking 3 m, turning around, and returning to  
36  
37 299 a seated position.

#### 38 300 *Balance and postural stability*

39  
40  
41 301 Postural stability and balance will be assessed using a previously reported method<sup>72</sup> with a FysioMeter  
42  
43 302 device (modified Nintendo Wii balance-board (Nintendo, Kyoto, Japan)) connected via Bluetooth to  
44  
45 303 software on a portable computer (FysioMeter ApS, Brønderslev, Denmark). Total centre of pressure  
46  
47 304 ellipse area (mm<sup>2</sup>) will be obtained.

#### 48 305 *Quadriceps ultrasound and myotonometry*

49  
50 306 Rectus femoris anatomical cross-sectional area will be measured from the right leg using B-mode 2D  
51  
52 307 ultrasonography (Hitachi EUB-6500; probe frequency, 7.5 MHz) under resting conditions with the  
53  
54 308 participant lying prone at a 45° as previously described.<sup>65</sup> Rectus femoris and vastus lateralis thickness,  
55  
56 309 subcutaneous fat thickness, and fibre pennation angles will be obtained. Measurements of the  
57  
58 310 viscoelastic properties of the soft tissue above the mid-point of the rectus femoris muscle will be  
59  
60 311 obtained using a myotonometry device (MyotonPro, Tallinn, Estonia).

1  
2  
3 312 *Anthropometric measures*  
4

5 313 Anthropometric measures of height, body mass, and waist and hip circumference will be attained in  
6  
7 314 accordance with standard protocols.<sup>73</sup> Bioelectrical impedance analysis (BIA) performed on an InBody  
8  
9 315 analyser (InBody 370, Chicago, Illinois, USA) will be used to estimate body composition (eg. body fat  
10  
11 316 percentage, fat-free mass).<sup>74 75</sup>

12  
13 317 *Survey pack*

14  
15 318 Participants will be provided with a survey pack containing the following questionnaires:

- 16  
17 319 (1) Integrated Palliative Outcome Scale (I-POS-Renal): a validated questionnaire measuring the  
18  
19 320 presence and severity of disease related symptoms. The I-POS-Renal was developed based on  
20  
21 321 the POS and IPOS palliative care surveys, but with the additional inclusion of symptoms  
22  
23 322 common in CKD such as pruritus and restless legs.<sup>76</sup>
- 24 323 (2) 12-Item Short Form Health Survey (SF-12): a validated 12-item questionnaire used to assess  
25  
26 324 generic health outcomes from the patient's perspective.<sup>77</sup>
- 27 325 (3) Functional Assessment of Chronic Illness Therapy-Fatigue (FACIT-F): a validated 13-item  
28  
29 326 multidimensional scale that assesses fatigue over the past seven days using a 5-point Likert  
30  
31 327 scale that covers physical fatigue, functional fatigue, emotional fatigue, and social  
32  
33 328 consequences of fatigue with excellent internal consistency and test-retest reliability.<sup>78 79</sup>
- 34 329 (4) Pittsburgh Sleep Quality Index (PSQI): self-rated questionnaire which assesses sleep quality  
35  
36 330 and disturbances over a 1-month time interval.<sup>80</sup>
- 37 331 (5) Patient Activation Measure (PAM): a validated, licenced tool measuring the spectrum of  
38  
39 332 knowledge, skills, and confidence in patients and capturing the extent to which they feel  
40  
41 333 engaged and confident in taking care of their condition ('activation').<sup>81</sup>
- 42 334 (6) Brief Health Literacy Screen (BHLS): a 3-item questionnaire to identify inadequate health  
43  
44 335 literacy,<sup>82</sup> validated against longer screening tools in populations with ESKD.<sup>83 84</sup>
- 45 336 (7) The Global Physical Activity Questionnaire (GPAQ): developed by the World Health  
46  
47 337 Organisation (WHO) for physical activity surveillance in countries. It collects information on  
48  
49 338 physical activity participation in three settings or domains (activity at work, travel to and from  
50  
51 339 places, and recreational activities) as well as sedentary behaviour, comprising 16 questions.<sup>85</sup>
- 52 340 (8) Duke Activity Status Index (DASI): a 12-item questionnaire that uses self-reported physical  
53  
54 341 work capacity to estimate peak metabolic equivalents and has been shown to be a valid  
55  
56 342 measurement of functional capacity.<sup>86</sup>

57  
58 343 *Habitual physical activity*  
59  
60

1  
2  
3 344 Objective data on habitual physical activity levels over a 7-day period (ideal minimum 6-days)<sup>87</sup> will be  
4  
5 345 gained from tri-axial accelerometers (GENEActiv, ActivInsights Ltd., Cambridge, UK). Participants will  
6  
7 346 receive the monitor at the baseline and follow-up assessments and will be asked to wear it from  
8  
9 347 midnight that evening for 7 days.

#### 10 348 *Blood and urine sampling*

11  
12 349 Venous blood (30 ml) will be collected using venepuncture of the antecubital vein and prepared and  
13  
14 350 stored appropriately for the following analysis:

- 15  
16 351 • Circulating markers of cardiovascular disease
- 17  
18 352 • Circulating markers of systemic inflammation and oxidative stress
- 19  
20 353 • Blood glucose and HbA1c
- 21  
22 354 • Lipids and triglycerides
- 23  
24 355 • Full blood count and renal profile

25  
26 356 A urine sample will be requested to ascertain urinary protein:creatinine ratio.

#### 27 28 357 **Follow-up assessments**

29  
30 358 Follow up visits are summarised in Figure 1. An instructional session (or more if required) following  
31  
32 359 baseline assessments will allow the intervention group to become familiar with the exercise  
33  
34 360 requirements and allow the research team to ensure safety and competence before commencing the  
35  
36 361 12-week home-based training program. This can be via video call or in-person. At 6 weeks into the 12-  
37  
38 362 week period for the intervention group only, participants will be invited to review exercise progression  
39  
40 363 (via video call or in-person), particularly if participants are struggling to undertake the requisite  
41  
42 364 amount of exercise, and as a refresher of the intervention. This combined with regular contact from  
43  
44 365 research staff should aid participant compliance and monitoring.

45  
46 366 Final assessments will be conducted for the exercise and control groups within 7 days of completing  
47  
48 367 the 12-week exercise or control period. Assessments completed will be identical to the baseline visit  
49  
50 368 with the addition of a 'patient satisfaction questionnaire' to allow pragmatic future development of  
51  
52 369 the study. This will also be offered to participants who withdraw from the trial. Three months after  
53  
54 370 completing the exercise intervention, participants will be contacted for a semi-structured one-to-one  
55  
56 371 telephone interview. This will aim to understand the impact of the intervention, if any, on subsequent  
57  
58 372 lifestyle and exercise habits.

#### 59 60 373 **Sub-studies**

61  
62 374 Additional informed consent will be sought for:

- 1  
2  
3 375 1. Ten 'healthy' control participants to undertake a CPET to assess the differences, if any,  
4 376 between CPET parameters in 'healthy controls' versus KTRs, particularly during the recovery  
5 377 period.  
6  
7  
8 378 2. KTRs completing the exercise intervention will be invited to undertake a semi-structured  
9 interview (via telephone, video call, or in-person) incorporating exercise self-efficacy,  
10 379 enjoyment, difficulties encountered, perceived advantages and disadvantages of the  
11 380 intervention, and study design. Participants who withdraw before the end of the intervention  
12 381 will also be invited to attend, although in line with ethical standards, this will be optional.  
13 382  
14  
15  
16

### 17 383 **Sample size**

18  
19 384 The purpose of this pilot study is to obtain appropriate data to adequately power future definitive  
20 385 trials;<sup>88</sup> a power calculation is neither relevant nor possible. A minimum sample size of 50 is based on  
21 386 accepted values to provide adequate estimates of standard deviations for future power calculations.<sup>89</sup>  
22  
23  
24

### 25 387 **Data collection and management**

26  
27 388 Data from all time points will be collected in case report forms (CRFs) by the trial team. All data will  
28 389 be entered into a secure database and will only be accessible on password-protected computers at  
29 390 UHL and University of Leicester by relevant members of the study team. No identifying information  
30 391 will be kept in electronic form. All source data and original participant identities will be kept in a locked  
31 392 office in the trial site file only at UHL.  
32  
33  
34  
35

### 36 393 **Data analysis**

37  
38 394 Data will be assessed for normality using histograms, the Shapiro-Wilk test and Q-Q plots. Continuous  
39 395 data to be expressed as mean ( $\pm$  standard deviation), if normally distributed or median (interquartile  
40 396 range) if not. To investigate the differences between interventions we will use analysis of (co-) variance.  
41 397 Independent samples t-tests and Mann-Whitney U tests will be used to assess for baseline  
42 398 differences between variables for normally and non-normally distributed data respectively. These  
43 399 data will be used to inform the power calculation for future definitive trials.  
44  
45  
46  
47

48 400 Qualitative data will be transcribed verbatim and analysed according to the principles of interpretive  
49 401 thematic analysis to explore themes emerging from patient journeys through, and experiences of, the  
50 402 interventions and outcome measures.  
51  
52  
53

54 403 Outcomes pertaining to the feasibility of the intervention and trial will be assessed and include:

- 55  
56 404
  - *Eligibility*: the percentage of patients screened who are eligible.
  - *Recruitment rate*: the percentage of patients eligible who consent to the trial and the monthly recruitment rate.  
57  
58  
59  
60



- 1  
2  
3 407 • *Adherence to the exercise intervention*: the number of completed sessions per week and  
4 specific intensity and durations achieved.  
5 408  
6  
7 409 • *Acceptability of randomisation*: comparison of the final group characteristics and  
8 identification of any stratification variables, if applicable.  
9 410  
10 411 • *Attrition rate*: the number of participants that drop-out of the study.  
11  
12 412 • *Outcome acceptability*: the percentage of missing data for each outcome measure.  
13  
14 413 • *Safety*: The number of self-reported injuries or adverse events throughout the trial.

15  
16 414 The *a priori* thresholds for specific feasibility and acceptability criteria are as follows: eligibility ( $\geq 50\%$ ),  
17 415 recruitment success of 20% of eligible participants ( $\geq 2$  participants per month), adherence (an average  
18 416 of 3 exercise sessions per week) and attrition ( $\leq 30\%$ ).

### 417 **Safety reporting**

418 All adverse events (AEs) or adverse reactions (ARs) and serious adverse events (SAEs) or serious  
419 adverse reactions (SARs) will be recorded from the time a patient enters the study to the final study  
420 visit. Each AE or AR will be considered for severity, causality, and expectedness and may be reclassified  
421 as an SAE or SAR if required.

422 An SAE is any AE that:

- 423 • is life threatening  
424 • requires hospitalization or prolongation of a hospital admission  
425 • results in a persistent or significant disability/incapacity  
426 • is a congenital anomaly  
427 • results in death

428 All AEs and ARs will be documented in participants CRFs, medical notes, and an AE log and will record  
429 the following information: description, date of onset and end date, severity, assessment of  
430 relatedness to study, other suspect device and action taken. Only AEs that are judged to be related to  
431 the study intervention or procedures will be reported to the sponsor.

432 All SAEs will be reported by the investigators to the sponsor within 24 hours of discovery or notification  
433 and the report will be signed by the chief investigator within 7 days. If the SAE is deemed related to  
434 the research procedures or intervention and is unexpected, a report will be sent to the research ethics  
435 committee (REC) within 15 days.

### 436 **Patient and public involvement**

437 A patient and public involvement (PPI) group has been convened and will meet with the research team  
438 to review progress and address issues that arise throughout the duration of the study. The PPI partners  
439 will assist in the interpretation and dissemination of results. The trial was designed in consultation

1  
2  
3 440 with PPI partners who advised on intervention content and outcome measure acceptability, paying  
4  
5 441 particular attention to patient burden, ensuring outcome measures would not over-burden  
6  
7 442 participants. The PPI group approved the final design and duration of this intervention and advised  
8  
9 443 the inclusion of an initial supervised intervention familiarisation period to build confidence in exercise  
10  
11 444 capability.

### 12 445 **Changes to the study protocol following the COVID-19 pandemic**

13  
14 446 The COVID-19 pandemic has made us all review the ways we design and deliver clinical studies. Whilst  
15  
16 447 patient safety remains the absolute priority of clinical and research teams, there is a need for research  
17  
18 448 to continue in a safe way that balances the benefits of continuing programs of research against the  
19  
20 449 risks from COVID-19. We have amended the study protocol in several ways to reduce any additional  
21  
22 450 exposure of patients to clinical environments where COVID-19 may be present:

- 23 451 • We have reduced the number of study visits to a minimum. The original study flow diagram is  
24  
25 452 included in Additional file 1. All interim assessments have been removed in the modified  
26  
27 453 protocol (Fig. 1) and the baseline and final study visits are now wrapped into part of patient  
28  
29 454 clinical care. That is to say, when they attend for their baseline and follow-up study visits they  
30  
31 455 will have their clinical review and clinical blood tests as they would for their normal clinical  
32  
33 456 care with a transplant nephrologist (MGB), so there is no increase in-patient visits to a clinical  
34  
35 457 environment over-and-above their normal care.
- 35 458 • The original study design included a 2-week face-to-face training period where participants  
36  
37 459 would attend the hospital to learn how to complete the exercises and the exercise program  
38  
39 460 with a member of the research team. This training period will now be done remotely, via video  
40  
41 461 conferencing, with discussion and feedback over the telephone and using the instructional  
42  
43 462 videos and literature that support the home-based exercise intervention.
- 43 463 • When participants attend for their study visits, departmental procedures have been updated  
44  
45 464 to now include meticulous cleaning of all equipment before and after use, one-way flows of  
46  
47 465 participants to ensure participants do not mix, and the use of personal protective equipment  
48  
49 466 for all staff and participants.

50  
51 467 The above changes have been agreed with the local REC and the study sponsor and have allowed  
52  
53 468 recommencement of study recruitment and procedures.

### 54 469 **DISCUSSION**

55  
56  
57 470 This pilot study is designed to assess the feasibility of delivering a structured, home-based, exercise  
58  
59 471 intervention in KTRs at increased cardiometabolic risk and evaluate the putative effects on  
60  
472 cardiovascular structure and functional changes, cardiorespiratory fitness, quality of life, healthcare

1  
2  
3 473 utilisation, patient activation, and engagement with the prescribed exercise program. It is the first trial  
4  
5 474 to use a pragmatic home-based program of exercise this patient group. It is also the first to use CMR  
6  
7 475 to evaluate the structural and functional changes of the heart in this at risk population.

8  
9 476 Qualitative data will provide valuable personal perspectives on the acceptability of this specific  
10  
11 477 exercise program. Transplant recipients experience complex medical journeys and are likely to have  
12  
13 478 specific unmet needs in the area of exercise and lifestyle.<sup>90</sup> This will be valuable information for future  
14  
15 479 randomised controlled trials (RCTs) and exercise guideline development.

16 480 Home-based intervention outcomes are reliant on accurate reporting by participants with regards to  
17  
18 481 frequency, intensity, and duration of exercise performed. This under-reporting is often a limitation of  
19  
20 482 unsupervised interventions. We will ensure participants are correctly advised of how to monitor and  
21  
22 483 report their exercise completion throughout the trial and encourage this through telephone  
23  
24 484 communications.

25 485 We anticipate that a positive outcome will lead to both an increased understanding of the specific  
26  
27 486 exercise requirements of KTRs and the development of new programs that promote longer-term  
28  
29 487 engendered lifestyle change that can be incorporated into standard practice with much lower financial  
30  
31 488 implications than in-centre supervised rehabilitation.

32 489

33  
34 490

35 491  
36  
37  
38  
39  
40  
41  
42  
43  
44  
45  
46  
47  
48  
49  
50  
51  
52  
53  
54  
55  
56  
57  
58  
59  
60

## 492 ETHICS AND DISSEMINATION

493

### 494 Ethical issues

495

496 University of Leicester are the sponsor for this study (UOL 0714). The protocol was reviewed by the  
497 East Midlands-Nottingham 2 research ethics committee and was given a favourable opinion (REC ref  
498 19/EM/0209) on 14/10/2019. Health Research Authority regulatory approval was given on  
499 14/10/2019, and the study was adopted on the National Institute for Health Research (NIHR) portfolio  
500 on 26/09/2019. Local governance approval was granted by UHL R&I on 31/01/2020. This study was  
501 prospectively registered with ClinicalTrials.gov (NCT04123951; 11.10.2019). The first participant was  
502 recruited on 09/03/2020. The predicted study end date is 31/12/2022. This manuscript is quorate with  
503 the most recent approved protocol (version 6 26.08.2020). Relevant parties will be informed of any  
504 substantial protocol modifications. Steps have been taken when designing this protocol to minimise  
505 the ethical implications and ensure patient welfare. The study will comply with the International  
506 Conference for Harmonisation of Good Clinical Practice (ICH GCP) guidelines and the Research  
507 Governance Framework for Health and Social Care.

508

509 **Dissemination:** On completion the results of this study will be published in peer-reviewed journals  
510 and presented at national and international conferences. Contributions of all authors to manuscripts  
511 arising from this study will be made explicit in the relevant of each individual journal. Participant level  
512 data will be available following publication of results on request to the Chief Investigator. Results will  
513 also be disseminated to the patient and public community via social media and newsletter articles and  
514 presentations at patient conferences and forums, led by the patient partners. It is anticipated that the  
515 results of this study will inform future design of larger RCTs in this subject area and contribute to  
516 future specific physical activity guidelines in this population.

517

518 **Twitter:** REB, @RBillany; MGB, @DrMattGB.

519

520 **Author contributions:** REB and MGB: study design, study setup, completion of study visits, drafting  
521 manuscript, revision of manuscript, finalising manuscript. NCB, TJW, ACW, SFA, KAR, KC, EMB, NJC,  
522 JB, GPM, JOB, and ACS: study design, drafting manuscript, revision of manuscript. NV, KP, JW:  
523 completion of study visits, drafting manuscript, revision of manuscript.

524

1  
2  
3 525 **Funding:** This study is funded by a project grant from Kidney Research UK (ref: KS\_RP\_003\_20180913).  
4  
5 526 Neither the sponsor nor the funder had or will have any input into study design; collection,  
6  
7 527 management, analysis, and interpretation of data; writing of the report; or the decision to submit the  
8  
9 528 report for publication.

10 529  
11 530 **Acknowledgements:** This research is supported by the National Institute for Health Research (NIHR)  
12  
13 531 Leicester Biomedical Research Centre. The views expressed are those of the authors and not  
14  
15 532 necessarily those of the NHS, the NIHR or the Department of Health.

16 533  
17  
18 534 **Competing interests:** None declared.

19  
20 535  
21 536 **Consent for publication:** Not applicable.

22  
23 537  
24  
25 538 **Figure Caption:**

26  
27  
28 539 Figure 1. ECSERT study flow diagram

29  
30 540  
31  
32 541  
33  
34 542  
35  
36 543  
37  
38 544  
39  
40 545  
41  
42 546  
43  
44 547  
45  
46 548  
47  
48 549  
49  
50 550  
51  
52 551  
53  
54 552  
55  
56 553  
57  
58 554  
59  
60

## 555 REFERENCES

556

- 557 1. Oniscu GC, Brown H, Forsythe JLR. How great is the survival advantage of transplantation over  
558 dialysis in elderly patients? *Nephrol Dial Transpl* 2004;19(4):945-51. doi: 10.1093/ndt/gfh022
- 559 2. Steenkamp R, Rao A, Fraser S. UK Renal Registry 18th Annual Report (December 2015) Chapter 5:  
560 Survival and Causes of Death in UK Adult Patients on Renal Replacement Therapy in 2014:  
561 National and Centre-specific Analyses. *Nephron* 2016;132 Suppl 1:111-44. doi:  
562 10.1159/000444819
- 563 3. Neale J, Smith AC. Cardiovascular risk factors following renal transplant. *World J Transplant*  
564 2015;5(4):183-95. doi: 10.5500/wjt.v5.i4.183
- 565 4. UK Renal Registry (2020) UK Renal Registry 22nd Annual Report – data to 31/12/2018, Bristol, UK.  
566 Available from renal.org/audit-research/annual-report
- 567 5. Kasiske BL, Gujjarro C, Massy ZA, et al. Cardiovascular disease after renal transplantation. *J Am Soc*  
568 *Nephrol* 1996;7(1):158-65
- 569 6. Carpenter MA, John A, Weir MR, et al. BP, cardiovascular disease, and death in the Folic Acid for  
570 Vascular Outcome Reduction in Transplantation trial. *J Am Soc Nephrol* 2014;25(7):1554-62.  
571 doi: 10.1681/asn.2013040435
- 572 7. Mall G, Huther W, Schneider J, et al. Diffuse intermyocardiocytic fibrosis in uraemic patients.  
573 *Nephrol Dial Transplant* 1990;5(1):39-44. doi: 10.1093/ndt/5.1.39
- 574 8. Bakri RS, Afzali B, Covic A, et al. Cardiovascular disease in renal allograft recipients is associated with  
575 elevated sialic acid or markers of inflammation. *Clin Transpl* 2004;18(2):201-04. doi:  
576 10.1111/j.1399-0012.2004.00156.x
- 577 9. Liefeldt L, Budde K. Risk factors for cardiovascular disease in renal transplant recipients and  
578 strategies to minimize risk. *Transpl Int* 2010;23(12):1191-204. doi: 10.1111/j.1432-  
579 2277.2010.01159.x
- 580 10. Van Laecke S, Malfait T, Schepers E, et al. Cardiovascular disease after transplantation: an  
581 emerging role of the immune system. *Transpl Int* 2018;31(7):689-99. doi: 10.1111/tri.13160
- 582 11. Weiner DE, Tighiouart H, Elsayed EF, et al. The Framingham predictive instrument in chronic kidney  
583 disease. *J Am Coll Cardiol* 2007;50(3):217-24. doi: 10.1016/j.jacc.2007.03.037
- 584 12. Aalten J, Peeters SA, van der Vlugt MJ, et al. Is standardized cardiac assessment of asymptomatic  
585 high-risk renal transplant candidates beneficial? *Nephrol Dial Transplant* 2011;26(9):3006-12.  
586 doi: 10.1093/ndt/gfq822
- 587 13. Mansell H, Rosaasen N, Dean J, et al. Evidence of enhanced systemic inflammation in stable kidney  
588 transplant recipients with low Framingham risk scores. *Clin Transpl* 2013;27(4):E391-E99
- 589 14. Mansell H, Stewart SA, Shoker A. Validity of cardiovascular risk prediction models in kidney  
590 transplant recipients. *Sci World J* 2014;2014:750579. doi: 10.1155/2014/750579
- 591 15. Devine PA, Courtney AE, Maxwell AP. Cardiovascular risk in renal transplant recipients. *J Nephrol*  
592 2019;32(3):389-99. doi: 10.1007/s40620-018-0549-4
- 593 16. Kasiske BL. Epidemiology of cardiovascular disease after renal transplantation. *Transplantation*  
594 2001;72(6 Suppl):S5-8. doi: 10.1097/00007890-200109271-00003
- 595 17. de Albuquerque Suassuna P, Sanders-Pinheiro H, de Paula R. Uremic Cardiomyopathy: A New Piece  
596 in the Chronic Kidney Disease-Mineral and Bone Disorder Puzzle. *Front Med (Lausanne)*  
597 2018;5:206-06. doi: 10.3389/fmed.2018.00206
- 598 18. Aoki J, Ikari Y, Nakajima H, et al. Clinical and pathologic characteristics of dilated cardiomyopathy  
599 in hemodialysis patients. *Kidney Int* 2005;67(1):333-40. doi: 10.1111/j.1523-  
600 1755.2005.00086.x
- 601 19. Mark PB, Doyle A, Blyth KG, et al. Vascular function assessed with cardiovascular magnetic  
602 resonance predicts survival in patients with advanced chronic kidney disease. *J Cardiovasc*  
603 *Magn R* 2008;10:39. doi: 10.1186/1532-429x-10-39

- 1  
2  
3 604 20. Foley RN, Parfrey PS, Harnett JD, et al. Clinical and echocardiographic disease in patients starting  
4 605 end-stage renal disease therapy. *Kidney Int* 1995;47(1):186-92. doi: 10.1038/ki.1995.22  
5 606  
6 607 21. Foley RN, Parfrey PS, Harnett JD, et al. The prognostic importance of left ventricular geometry in  
7 608 uremic cardiomyopathy. *J Am Soc Nephrol* 1995;5(12):2024-31  
8 609  
9 610 22. Ali A, Macphee I, Kaski JC, et al. Cardiac and vascular changes with kidney transplantation. *Indian*  
10 611 *J Nephrol* 2016;26(1):1-9. doi: 10.4103/0971-4065.165003  
11 612  
12 613 23. Patel RK, Mark PB, Johnston N, et al. Renal Transplantation Is Not Associated with Regression of  
13 614 Left Ventricular Hypertrophy: A Magnetic Resonance Study. *Clin J Am Soc Nephrol*  
14 615 2008;3(6):1807-11. doi: 10.2215/cjn.01400308  
15 616  
16 617 24. Graham-Brown MPM, Adenwalla SF, Lai FY, et al. The reproducibility of cardiac magnetic  
17 618 resonance imaging measures of aortic stiffness and their relationship to cardiac structure in  
18 619 prevalent haemodialysis patients. *Clin Kidney J* 2018;11(6):864-73. doi: 10.1093/ckj/sfy042  
19 620  
20 621 25. Graham-Brown MPM, Rutherford E, Levelt E, et al. Native T1 mapping: inter-study, inter-observer  
21 622 and inter-center reproducibility in hemodialysis patients. *J Cardiovasc Magn R* 2017;19(1) doi:  
22 623 10.1186/s12968-017-0337-7  
23 624  
24 625 26. Graham-Brown MP, Gulsin GS, Parke K, et al. A comparison of the reproducibility of two cine-  
25 626 derived strain software programmes in disease states. *Eur J Radiol* 2019;113:51-58. doi:  
26 627 10.1016/j.ejrad.2019.01.026  
27 628  
28 629 27. Kriska AM, Saremi A, Hanson RL, et al. Physical activity, obesity, and the incidence of type 2  
29 630 diabetes in a high-risk population. *Am J Epidemiol* 2003;158(7):669-75. doi:  
30 631 10.1093/aje/kwg191  
31 632  
32 633 28. Stamatakis E, Gale J, Bauman A, et al. Sitting Time, Physical Activity, and Risk of Mortality in Adults.  
33 634 *J Am Coll Cardiol* 2019;73(16):2062-72. doi: doi:10.1016/j.jacc.2019.02.031  
34 635  
35 636 29. Koolhaas CM, Dhana K, Schoufour JD, et al. Impact of physical activity on the association of  
36 637 overweight and obesity with cardiovascular disease: The Rotterdam Study. *Eur J Prev Cardiol*  
37 638 2017;24(9):934-41. doi: 10.1177/2047487317693952  
38 639  
39 640 30. Swift DL, Lavie CJ, Johannsen NM, et al. Physical activity, cardiorespiratory fitness, and exercise  
40 641 training in primary and secondary coronary prevention. *Circ J* 2013;77(2):281-92. doi:  
41 642 10.1253/circj.cj-13-0007  
42 643  
43 644 31. Barengo NC, Hu G, Lakka TA, et al. Low physical activity as a predictor for total and cardiovascular  
44 645 disease mortality in middle-aged men and women in Finland. *Eur Heart J* 2004;25(24):2204-  
45 646 11. doi: 10.1016/j.ehj.2004.10.009  
46 647  
47 648 32. Nielens H, Lejeune TM, Lalaoui A, et al. Increase of physical activity level after successful renal  
48 649 transplantation: a 5 year follow-up study. *Nephrol Dial Transpl* 2001;16(1):134-40. doi:  
49 650 10.1093/ndt/16.1.134  
50 651  
51 652 33. Dontje ML, de Greef MH, Krijnen WP, et al. Longitudinal measurement of physical activity following  
52 653 kidney transplantation. *Clin Transplant* 2014;28(4):394-402. doi: 10.1111/ctr.12325  
53 654  
54 655 34. Masiero L, Puoti F, Bellis L, et al. Physical activity and renal function in the Italian kidney transplant  
55 656 population. *Ren Fail* 2020;42(1):1192-204. doi: 10.1080/0886022x.2020.1847723  
56 657  
57 658 35. Wilkinson TJ, Clarke AL, Nixon DGD, et al. Prevalence and correlates of physical activity across  
58 659 kidney disease stages: an observational multicentre study. *Nephrol Dial Transpl* 2019 doi:  
59 660 10.1093/ndt/gfz235  
60

1  
2  
3  
4  
5  
6  
7  
8  
9  
10  
11  
12  
13  
14  
15  
16  
17  
18  
19  
20  
21  
22  
23  
24  
25  
26  
27  
28  
29  
30  
31  
32  
33  
34  
35  
36  
37  
38  
39  
40  
41  
42  
43  
44  
45  
46  
47  
48  
49  
50  
51  
52  
53  
54  
55  
56  
57  
58  
59  
60

- 653 39. Mathur S, Janaudis-Ferreira T, Wickerson L, et al. Meeting Report: Consensus Recommendations  
654 for a Research Agenda in Exercise in Solid Organ Transplantation. *Am J Transplant*  
655 2014;14(10):2235-45. doi: 10.1111/ajt.12874
- 656 40. Masajtis-Zagajewska A, Muras K, Nowicki M. Effects of a Structured Physical Activity Program on  
657 Habitual Physical Activity and Body Composition in Patients With Chronic Kidney Disease and  
658 in Kidney Transplant Recipients. *Exp Clin Transplant* 2019;17(2):155-64. doi:  
659 10.6002/ect.2017.0305
- 660 41. O'Connor EM, Koufaki P, Mercer TH, et al. Long-term pulse wave velocity outcomes with aerobic  
661 and resistance training in kidney transplant recipients - A pilot randomised controlled trial.  
662 *PLoS One* 2017;12(2):e0171063. doi: 10.1371/journal.pone.0171063
- 663 42. Moraes Dias CJ, Anaisse Azoubel LM, Araujo Costa H, et al. Autonomic modulation analysis in active  
664 and sedentary kidney transplanted recipients. *Clin Exp Pharmacol Physiol* 2015;42(12):1239-  
665 44. doi: 10.1111/1440-1681.12481
- 666 43. Karelis AD, Hébert MJ, Rabasa-Lhoret R, et al. Impact of Resistance Training on Factors Involved in  
667 the Development of New-Onset Diabetes After Transplantation in Renal Transplant  
668 Recipients: An Open Randomized Pilot Study. *Can J Diabetes* 2016;40(5):382-88. doi:  
669 10.1016/j.cjcd.2015.08.014
- 670 44. Roi GS, Stefoni S, Mosconi G, et al. Physical activity in solid organ transplant recipients:  
671 organizational aspects and preliminary results of the Italian project. *Transplant Proc*  
672 2014;46(7):2345-9. doi: 10.1016/j.transproceed.2014.07.055
- 673 45. Romano G, Simonella R, Falleti E, et al. Physical training effects in renal transplant recipients. *Clin*  
674 *Transplant* 2010;24(4):510-4. doi: 10.1111/j.1399-0012.2009.01098.x
- 675 46. Kinnafick FE, Thogersen-Ntoumani C, Shepherd SO, et al. In It Together: A Qualitative Evaluation  
676 of Participant Experiences of a 10-Week, Group-Based, Workplace HIIT Program for  
677 Insufficiently Active Adults. *J Sport Exerc Psychol* 2018;40(1):10-19. doi: 10.1123/jsep.2017-  
678 0306
- 679 47. van Baar ME, Dekker J, Oostendorp RA, et al. Effectiveness of exercise in patients with  
680 osteoarthritis of hip or knee: nine months' follow up. *Ann Rheum Dis* 2001;60(12):1123-30.  
681 doi: 10.1136/ard.60.12.1123
- 682 48. Timmons JF, Griffin C, Cogan KE, et al. Exercise Maintenance in Older Adults 1 Year After  
683 Completion of a Supervised Training Intervention. *J Am Geriatr Soc* 2020;68(1):163-69. doi:  
684 10.1111/jgs.16209
- 685 49. Hibbard JH, Greene J. What The Evidence Shows About Patient Activation: Better Health Outcomes  
686 And Care Experiences; Fewer Data On Costs. *Health Affairs* 2013;32(2):207-14. doi:  
687 10.1377/hlthaff.2012.1061
- 688 50. Skolasky RL, Mackenzie EJ, Wegener ST, et al. Patient activation and adherence to physical therapy  
689 in persons undergoing spine surgery. *Spine (Phila Pa 1976)* 2008;33(21):E784-E91. doi:  
690 10.1097/BRS.0b013e31818027f1
- 691 51. Baggetta R, D'Arrigo G, Torino C, et al. Effect of a home based, low intensity, physical exercise  
692 program in older adults dialysis patients: a secondary analysis of the EXCITE trial. *BMC Geriatr*  
693 2018;18(1):248. doi: 10.1186/s12877-018-0938-5
- 694 52. Imran HM, Baig M, Erqou S, et al. Home-Based Cardiac Rehabilitation Alone and Hybrid With  
695 Center-Based Cardiac Rehabilitation in Heart Failure: A Systematic Review and Meta-Analysis.  
696 *J Am Heart Assoc* 2019;8(16):e012779. doi:10.1161/JAHA.119.012779
- 697 53. Uchiyama K, Washida N, Morimoto K, et al. Home-based Aerobic Exercise and Resistance Training  
698 in Peritoneal Dialysis Patients: A Randomized Controlled Trial. *Sci Rep* 2019;9(1):2632. doi:  
699 10.1038/s41598-019-39074-9
- 700 54. Aoike DT, Baria F, Kamimura MA, et al. Home-based versus center-based aerobic exercise on  
701 cardiopulmonary performance, physical function, quality of life and quality of sleep of  
702 overweight patients with chronic kidney disease. *Clin Exp Nephrol* 2018;22(1):87-98. doi:  
703 10.1007/s10157-017-1429-2



- 1  
2  
3 704 55. Majchrzak KM, Pupim LB, Chen K, et al. Physical activity patterns in chronic hemodialysis patients:  
4 705 comparison of dialysis and nondialysis days. *J Ren Nutr* 2005;15(2):217-24. doi:  
5 706 10.1053/j.jrn.2004.08.002  
6  
7 707 56. Carvalho EV, Reboredo MM, Gomes EP, et al. Physical activity in daily life assessed by an  
8 708 accelerometer in kidney transplant recipients and hemodialysis patients. *Transplant Proc*  
9 709 2014;46(6):1713-7. doi: 10.1016/j.transproceed.2014.05.019  
10 710 57. Borg GA. Perceived exertion: a note on "history" and methods. *Med Sci Sports* 1973;5(2):90-3.  
11 711 58. Brzycki M. Strength Testing—Predicting a One-Rep Max from Reps-to-Fatigue. *Journal of Physical*  
12 712 *Education, Recreation & Dance* 1993;64(1):88-90. doi: 10.1080/07303084.1993.10606684  
13 713 59. Schoenfeld BJ, Grgic J, Ogborn D, et al. Strength and Hypertrophy Adaptations Between Low- vs.  
14 714 High-Load Resistance Training: A Systematic Review and Meta-analysis. *J Strength Cond Res*  
15 715 2017;31(12):3508-23. doi: 10.1519/jsc.0000000000002200  
16 716 60. Hunold P, Vogt FM, Heemann UW, et al. Myocardial mass and volume measurement of  
17 717 hypertrophic left ventricles by MRI—study in dialysis patients examined before and after  
18 718 dialysis. *J Cardiovasc Magn R* 2003;5(4):553-61. doi: 10.1081/jcmr-120025230  
19 719 61. Graham-Brown MP, March DS, Churchward DR, et al. Novel cardiac nuclear magnetic resonance  
20 720 method for noninvasive assessment of myocardial fibrosis in hemodialysis patients. *Kidney Int*  
21 721 2016;90(4):835-44. doi: 10.1016/j.kint.2016.07.014  
22 722 62. Xu HY, Yang ZG, Zhang Y, et al. Prognostic value of heart failure in hemodialysis-dependent end-  
23 723 stage renal disease patients with myocardial fibrosis quantification by extracellular volume on  
24 724 cardiac magnetic resonance imaging. *BMC Cardiovasc Disord* 2020;20(1):12. doi:  
25 725 10.1186/s12872-019-01313-2  
26 726 63. Graham-Brown MP, Singh AS, Gulsin GS, et al. Defining myocardial fibrosis in haemodialysis  
27 727 patients with non-contrast cardiac magnetic resonance. *BMC Cardiovasc Disord*  
28 728 2018;18(1):145. doi: 10.1186/s12872-018-0885-2  
29 729 64. Xue H, Brown LAE, Nielles-Vallespin S, et al. Automatic in-line quantitative myocardial perfusion  
30 730 mapping: Processing algorithm and implementation. *Magn Reson Med* 2020;83(2):712-30.  
31 731 doi: 10.1002/mrm.27954  
32 732 65. Gould DW, Watson EL, Wilkinson TJ, et al. Ultrasound assessment of muscle mass in response to  
33 733 exercise training in chronic kidney disease: a comparison with MRI. *J Cachexia Sarcopenia*  
34 734 *Muscle* 2019;10(4):748-55. doi: 10.1002/jcsm.12429  
35 735 66. ATS/ACCP Statement on Cardiopulmonary Exercise Testing. *Am J Resp Crit Care* 2003;167(2):211-  
36 736 77. doi: 10.1164/rccm.167.2.211  
37 737 67. Feiring DC, Ellenbecker TS, Derscheid GL. Test-Retest Reliability of the Biodex Isokinetic  
38 738 Dynamometer. *J Orthop Sport Phys* 1990;11(7):298-300. doi: 10.2519/jospt.1990.11.7.298  
39 739 68. Wilkinson TJP, Xenophontos SM, Gould DWP, et al. Test-retest reliability, validation, and "minimal  
40 740 detectable change" scores for frequently reported tests of objective physical function in  
41 741 patients with non-dialysis chronic kidney disease. *Physiother Theory Pract* 2019;35(6):565-76.  
42 742 doi: 10.1080/09593985.2018.1455249  
43 743 69. Wilkinson TJ, Gabrys I, Lightfoot CJ, et al. A Systematic Review of Handgrip Strength Measurement  
44 744 in Clinical and Epidemiological Studies of Kidney Disease: Toward a Standardized Approach. *J*  
45 745 *Ren Nutr* 2021 doi: 10.1053/j.jrn.2021.06.005  
46 746 70. Podsiadlo D, Richardson S. The timed "Up & Go": a test of basic functional mobility for frail elderly  
47 747 persons. *J Am Geriatr Soc* 1991;39(2):142-8. doi: 10.1111/j.1532-5415.1991.tb01616.x  
48 748 71. Hadjiioannou I, Wong K, Lindup H, et al. Test-retest reliability for physical function measures in  
49 749 patients with chronic kidney disease. *J Ren Care* 2019 doi: 10.1111/jorc.12310  
50 750 72. Wilkinson TJ, Nixon DGD, Smith AC. Postural stability during standing and its association with  
51 751 physical and cognitive functions in non-dialysis chronic kidney disease patients. *Int J Nephrol*  
52 752 *Urol* 2019;51(8):1407-14. doi: 10.1007/s11255-019-02192-4  
53 753 73. Eston RG, Reilly T. Kinanthropometry and exercise physiology laboratory manual: tests,  
54 754 procedures, and data. 3rd ed. Abingdon: Routledge 2009.

- 1  
2  
3 755 74. Chertow GM, Lowrie EG, Wilmore DW, et al. Nutritional assessment with bioelectrical impedance  
4 756 analysis in maintenance hemodialysis patients. *J Am Soc Nephrol* 1995;6(1):75-81.  
5 757  
6 758 75. Macdonald JH, Marcora SM, Jibani M, et al. Bioelectrical impedance can be used to predict muscle  
7 759 mass and hence improve estimation of glomerular filtration rate in non-diabetic patients with  
8 760 chronic kidney disease. *Nephrol Dial Transpl* 2006;21(12):3481-7. doi: 10.1093/ndt/gfl432  
9 761  
10 762 76. Raj R, Ahuja K, Frandsen M, et al. Validation of the IPOS-Renal Symptom Survey in Advanced Kidney  
11 763 Disease: A Cross-sectional Study. *J Pain Symptom Manage* 2018;56(2):281-87. doi:  
12 764 10.1016/j.jpainsymman.2018.04.006  
13 765  
14 766 77. Ware Jr JE, Kosinski M, Keller SD. A 12-Item Short-Form Health Survey: construction of scales and  
15 767 preliminary tests of reliability and validity. *Med Care* 1996;220-33.  
16 768  
17 769 78. Wang S-Y, Zang X-Y, Liu J-D, et al. Psychometric Properties of the Functional Assessment of Chronic  
18 770 Illness Therapy-Fatigue (FACIT-Fatigue) in Chinese Patients Receiving Maintenance Dialysis. *J*  
19 771 *Pain Symptom Manage* 2015;49(1):135-43. doi: 10.1016/j.jpainsymman.2014.04.011  
20 772  
21 773 79. Yellen SB, Cella DF, Webster K, et al. Measuring fatigue and other anemia-related symptoms with  
22 774 the Functional Assessment of Cancer Therapy (FACT) measurement system. *J Pain Symptom*  
23 775 *Manage* 1997;13(2):63-74. doi: 10.1016/s0885-3924(96)00274-6  
24 776  
25 777 80. Buysse DJ, Reynolds CF, Monk TH, et al. The Pittsburgh Sleep Quality Index: a new instrument for  
26 778 psychiatric practice and research. *Psychiatry Res* 1989;28(2):193-213. doi: 10.1016/0165-  
27 779 1781(89)90047-4  
28 780  
29 781 81. Hibbard JH, Stockard J, Mahoney ER, et al. Development of the Patient Activation Measure (PAM):  
30 782 Conceptualizing and Measuring Activation in Patients and Consumers. *Health Serv Res*  
31 783 2004;39(4p1):1005-26. doi: 10.1111/j.1475-6773.2004.00269.x  
32 784  
33 785 82. Chew LD, Bradley KA, Boyko EJ. Brief questions to identify patients with inadequate health literacy.  
34 786 *Fam Med* 2004;36(8):588-94  
35 787  
36 788 83. Cavanaugh KL, Osborn CY, Tentori F, et al. Performance of a brief survey to assess health literacy  
37 789 in patients receiving hemodialysis. *Clinical Kidney Journal* 2015;8(4):462-8. doi:  
38 790 <https://dx.doi.org/10.1093/ckj/sfv037>  
39 791  
40 792 84. Dageforde LA, Cavanaugh KL, Moore DE, et al. Validation of the written administration of the short  
41 793 literacy survey. *J Health Commun* 2015;20(7):835-42. doi: 10.1080/10810730.2015.1018572  
42 794  
43 795 85. Bull FC, Maslin TS, Armstrong T. Global physical activity questionnaire (GPAQ): nine country  
44 796 reliability and validity study. *J Phys Act Health* 2009;6(6):790-804. doi: 10.1123/jpah.6.6.790  
45 797  
46 798 86. Hlatky MA, Boineau RE, Higginbotham MB, et al. A brief self-administered questionnaire to  
47 799 determine functional capacity (the Duke Activity Status Index). *Am J Cardiol* 1989;64(10):651-  
48 800 4. doi: 10.1016/0002-9149(89)90496-7  
49 801  
50 802 87. Dillon CB, Fitzgerald AP, Kearney PM, et al. Number of Days Required to Estimate Habitual Activity  
51 803 Using Wrist-Worn GENEActiv Accelerometer: A Cross-Sectional Study. *PLOS ONE*  
52 804 2016;11(5):e0109913. doi: 10.1371/journal.pone.0109913  
53 805  
54 806 88. Moore CG, Carter RE, Nietert PJ, et al. Recommendations for Planning Pilot Studies in Clinical and  
55 807 Translational Research. *J Clin Transl Sci* 2011;4(5):332-37. doi: 10.1111/j.1752-  
56 808 8062.2011.00347.x  
57 809  
58 810 89. Sim J, Lewis M. The size of a pilot study for a clinical trial should be calculated in relation to  
59 811 considerations of precision and efficiency. *J Clin Epidemiol* 2012;65(3):301-8. doi:  
60 812 10.1016/j.jclinepi.2011.07.011  
61 813  
62 814 90. Gordon EJ, Prohaska T, Siminoff LA, et al. Needed: Tailored exercise regimens for kidney transplant  
63 815 recipients. *Am J Kidney Dis* 2005;45(4):769-74. doi: 10.1053/j.ajkd.2005.01.002  
64 816  
65 817  
66 818  
67 819  
68 820  
69 821  
70 822

802

Table 1. ECSERT inclusion and exclusion criteria

| Inclusion Criteria                                                                                                                                                                                                                                                                                                                                                                                                                                                                                                            | Exclusion Criteria                                                                                                                                                                                                                                                                                                                                                                                                                                                                                                                           |
|-------------------------------------------------------------------------------------------------------------------------------------------------------------------------------------------------------------------------------------------------------------------------------------------------------------------------------------------------------------------------------------------------------------------------------------------------------------------------------------------------------------------------------|----------------------------------------------------------------------------------------------------------------------------------------------------------------------------------------------------------------------------------------------------------------------------------------------------------------------------------------------------------------------------------------------------------------------------------------------------------------------------------------------------------------------------------------------|
| <b>RTRs</b>                                                                                                                                                                                                                                                                                                                                                                                                                                                                                                                   |                                                                                                                                                                                                                                                                                                                                                                                                                                                                                                                                              |
| <ul style="list-style-type: none"> <li>• Prevalent KTR &gt;1 year</li> <li>• Male or female, aged &gt;18 years old</li> <li>• Willing and able to give informed consent for participation in the study</li> <li>• Increased cardiometabolic risk with at least one of:               <ul style="list-style-type: none"> <li>• Diabetes mellitus</li> <li>• Dyslipidaemia</li> <li>• Hypertension</li> <li>• Obesity (BMI &gt;30)</li> <li>• History of ischaemic heart disease/cerebrovascular disease</li> </ul> </li> </ul> | <ul style="list-style-type: none"> <li>• Inability to give informed consent or comply with testing and exercise protocol for any reason</li> <li>• Unable to undergo CMR scanning (incompatible implants, claustrophobia, allergy to agents etc.)</li> <li>• Female participants who are pregnant, lactating, or planning pregnancy during the course of the study</li> <li>• Scheduled elective surgery or other procedures requiring general anaesthesia during the study</li> <li>• Any other significant disease or disorder*</li> </ul> |
| <b>Healthy controls</b>                                                                                                                                                                                                                                                                                                                                                                                                                                                                                                       |                                                                                                                                                                                                                                                                                                                                                                                                                                                                                                                                              |
| <ul style="list-style-type: none"> <li>• Age &lt;18 years</li> <li>• No documented history of major cardiorespiratory chronic condition</li> <li>• None of the following cardiometabolic risk factors:               <ul style="list-style-type: none"> <li>• Diabetes mellitus</li> <li>• Dyslipidaemia</li> <li>• Hypertension</li> <li>• History of ischaemic heart disease/cerebrovascular disease</li> <li>• Obesity (BMI&gt;30)</li> </ul> </li> <li>• Not on any medication</li> </ul>                                 | <ul style="list-style-type: none"> <li>• Unable to undertake exercise testing due to physical or psychological barriers</li> <li>• Scheduled elective surgery or other procedures requiring general anaesthesia during the study</li> <li>• Inability to give informed consent or comply with testing and exercise protocol for any reason</li> <li>• Any other significant disease or disorder*</li> </ul>                                                                                                                                  |

\*i.e. significant co-morbidity including unstable hypertension, potentially lethal arrhythmia, myocardial infarction within 6 months, unstable angina, active liver disease, uncontrolled diabetes mellitus (HbA1c  $\geq$  9%), advanced cerebral or peripheral vascular disease which, in the opinion of the patient's own clinician, may either put the patient at risk because of participation in the study, or may influence the result of the study, or the patient's ability to participate in the study.

803

804

805

806

807

808

1  
2  
3  
4  
5  
6  
7  
8  
9  
10  
11  
12  
13  
14  
15  
16  
17  
18  
19  
20  
21  
22  
23  
24  
25  
26  
27  
28  
29  
30  
31  
32  
33  
34  
35  
36  
37  
38  
39  
40  
41  
42  
43  
44  
45  
46  
47  
48  
49  
50  
51  
52  
53  
54  
55  
56  
57  
58  
59  
60

809 **Additional file details**

810 File name: Additional File 1

811 File format: Additional File 1.pdf

812 Title of data: Original ECSERT flow diagram (pre-COVID-19)

813 Description of data: Flow diagram prior to COVID-19 amendments

814

815

816

For peer review only

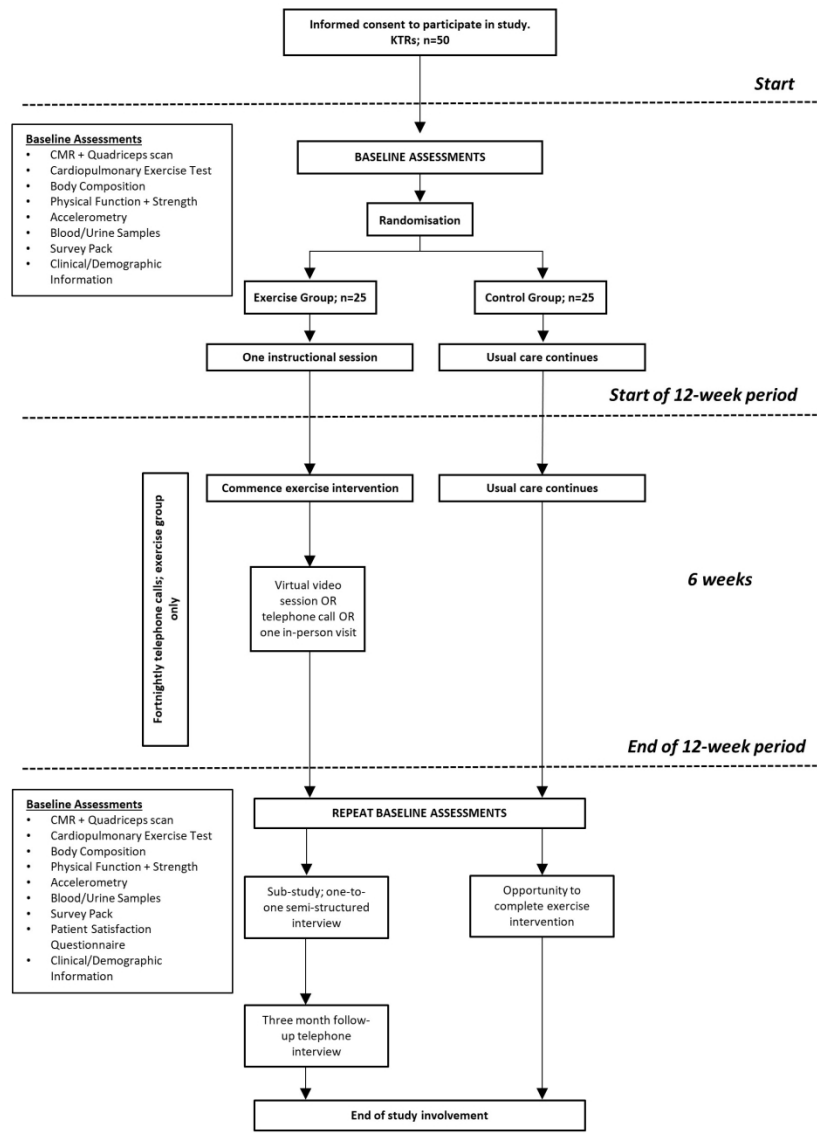

Figure 1 ECSERT Study Flow Diagram

170x219mm (300 x 300 DPI)



Figure X. Original ECSERT study flow diagram (pre-COVID-19)



STANDARD PROTOCOL ITEMS: RECOMMENDATIONS FOR INTERVENTIONAL TRIALS

SPIRIT 2013 Checklist: Recommended items to address in a clinical trial protocol and related documents\*

| Section/item                      | Item No | Description                                                                                                                                                                                                                                                                                                 |
|-----------------------------------|---------|-------------------------------------------------------------------------------------------------------------------------------------------------------------------------------------------------------------------------------------------------------------------------------------------------------------|
| <b>Administrative information</b> |         |                                                                                                                                                                                                                                                                                                             |
| Title                             | 1       | Descriptive title identifying the study design, population, interventions, and, if applicable, trial acronym (Page 1, lines 1-3)                                                                                                                                                                            |
| Trial registration                | 2a      | Trial identifier and registry name. If not yet registered, name of intended registry (Page 2, lines 67)                                                                                                                                                                                                     |
|                                   | 2b      | All items from the World Health Organization Trial Registration Data Set (Yes, throughout)                                                                                                                                                                                                                  |
| Protocol version                  | 3       | Date and version identifier (page 16, line 494)                                                                                                                                                                                                                                                             |
| Funding                           | 4       | Sources and types of financial, material, and other support (page 16, line 506 and page 16, lines 511-513)                                                                                                                                                                                                  |
| Roles and responsibilities        | 5a      | Names, affiliations, and roles of protocol contributors (page 1 and 15)                                                                                                                                                                                                                                     |
|                                   | 5b      | Name and contact information for the trial sponsor (page 16, line 488)                                                                                                                                                                                                                                      |
|                                   | 5c      | Role of study sponsor and funders, if any, in study design; collection, management, analysis, and interpretation of data; writing of the report; and the decision to submit the report for publication, including whether they will have ultimate authority over any of these activities (page 16, 506-509) |
|                                   | 5d      | Composition, roles, and responsibilities of the coordinating centre, steering committee, endpoint adjudication committee, data management team, and other individuals or groups overseeing the trial, if applicable (see Item 21a for data monitoring committee) N/A                                        |
| <b>Introduction</b>               |         |                                                                                                                                                                                                                                                                                                             |
| Background and rationale          | 6a      | Description of research question and justification for undertaking the trial, including summary of relevant studies (published and unpublished) examining benefits and harms for each intervention (Introduction, page 3)                                                                                   |
|                                   | 6b      | Explanation for choice of comparators (Introduction, page 3)                                                                                                                                                                                                                                                |
| Objectives                        | 7       | Specific objectives or hypotheses (Page 4)                                                                                                                                                                                                                                                                  |

|    |                                                           |     |                                                                                                                                                                                                                                                                                                                                                                                                         |
|----|-----------------------------------------------------------|-----|---------------------------------------------------------------------------------------------------------------------------------------------------------------------------------------------------------------------------------------------------------------------------------------------------------------------------------------------------------------------------------------------------------|
| 1  |                                                           |     |                                                                                                                                                                                                                                                                                                                                                                                                         |
| 2  | Trial design                                              | 8   | Description of trial design including type of trial (eg, parallel group, crossover, factorial, single group), allocation ratio, and framework (eg, superiority, equivalence, noninferiority, exploratory) (Page 5)                                                                                                                                                                                      |
| 3  |                                                           |     |                                                                                                                                                                                                                                                                                                                                                                                                         |
| 4  |                                                           |     |                                                                                                                                                                                                                                                                                                                                                                                                         |
| 5  |                                                           |     |                                                                                                                                                                                                                                                                                                                                                                                                         |
| 6  |                                                           |     |                                                                                                                                                                                                                                                                                                                                                                                                         |
| 7  |                                                           |     |                                                                                                                                                                                                                                                                                                                                                                                                         |
| 8  | <b>Methods: Participants, interventions, and outcomes</b> |     |                                                                                                                                                                                                                                                                                                                                                                                                         |
| 9  |                                                           |     |                                                                                                                                                                                                                                                                                                                                                                                                         |
| 10 | Study setting                                             | 9   | Description of study settings (eg, community clinic, academic hospital) and list of countries where data will be collected. Reference to where list of study sites can be obtained (Page 5, line 141-143)                                                                                                                                                                                               |
| 11 |                                                           |     |                                                                                                                                                                                                                                                                                                                                                                                                         |
| 12 |                                                           |     |                                                                                                                                                                                                                                                                                                                                                                                                         |
| 13 |                                                           |     |                                                                                                                                                                                                                                                                                                                                                                                                         |
| 14 | Eligibility criteria                                      | 10  | Inclusion and exclusion criteria for participants. If applicable, eligibility criteria for study centres and individuals who will perform the interventions (eg, surgeons, psychotherapists) (Table 1)                                                                                                                                                                                                  |
| 15 |                                                           |     |                                                                                                                                                                                                                                                                                                                                                                                                         |
| 16 |                                                           |     |                                                                                                                                                                                                                                                                                                                                                                                                         |
| 17 |                                                           |     |                                                                                                                                                                                                                                                                                                                                                                                                         |
| 18 |                                                           |     |                                                                                                                                                                                                                                                                                                                                                                                                         |
| 19 | Interventions                                             | 11a | Interventions for each group with sufficient detail to allow replication, including how and when they will be administered (Page 5 and 6)                                                                                                                                                                                                                                                               |
| 20 |                                                           |     |                                                                                                                                                                                                                                                                                                                                                                                                         |
| 21 |                                                           |     |                                                                                                                                                                                                                                                                                                                                                                                                         |
| 22 |                                                           | 11b | Criteria for discontinuing or modifying allocated interventions for a given trial participant (eg, drug dose change in response to harms, participant request, or improving/worsening disease) (Page 6, lines 176-178)                                                                                                                                                                                  |
| 23 |                                                           |     |                                                                                                                                                                                                                                                                                                                                                                                                         |
| 24 |                                                           |     |                                                                                                                                                                                                                                                                                                                                                                                                         |
| 25 |                                                           |     |                                                                                                                                                                                                                                                                                                                                                                                                         |
| 26 |                                                           |     |                                                                                                                                                                                                                                                                                                                                                                                                         |
| 27 |                                                           |     |                                                                                                                                                                                                                                                                                                                                                                                                         |
| 28 |                                                           | 11c | Strategies to improve adherence to intervention protocols, and any procedures for monitoring adherence (eg, drug tablet return, laboratory tests) (Page 10, lines 323-327)                                                                                                                                                                                                                              |
| 29 |                                                           |     |                                                                                                                                                                                                                                                                                                                                                                                                         |
| 30 |                                                           |     |                                                                                                                                                                                                                                                                                                                                                                                                         |
| 31 |                                                           |     |                                                                                                                                                                                                                                                                                                                                                                                                         |
| 32 |                                                           | 11d | Relevant concomitant care and interventions that are permitted or prohibited during the trial (Page 5, line 164)                                                                                                                                                                                                                                                                                        |
| 33 |                                                           |     |                                                                                                                                                                                                                                                                                                                                                                                                         |
| 34 |                                                           |     |                                                                                                                                                                                                                                                                                                                                                                                                         |
| 35 | Outcomes                                                  | 12  | Primary, secondary, and other outcomes, including the specific measurement variable (eg, systolic blood pressure), analysis metric (eg, change from baseline, final value, time to event), method of aggregation (eg, median, proportion), and time point for each outcome. Explanation of the clinical relevance of chosen efficacy and harm outcomes is strongly recommended (Study timeline, page 7) |
| 36 |                                                           |     |                                                                                                                                                                                                                                                                                                                                                                                                         |
| 37 |                                                           |     |                                                                                                                                                                                                                                                                                                                                                                                                         |
| 38 |                                                           |     |                                                                                                                                                                                                                                                                                                                                                                                                         |
| 39 |                                                           |     |                                                                                                                                                                                                                                                                                                                                                                                                         |
| 40 |                                                           |     |                                                                                                                                                                                                                                                                                                                                                                                                         |
| 41 |                                                           |     |                                                                                                                                                                                                                                                                                                                                                                                                         |
| 42 |                                                           |     |                                                                                                                                                                                                                                                                                                                                                                                                         |
| 43 | Participant timeline                                      | 13  | Time schedule of enrolment, interventions (including any run-ins and washouts), assessments, and visits for participants. A schematic diagram is highly recommended (see Figure) (Figure 1)                                                                                                                                                                                                             |
| 44 |                                                           |     |                                                                                                                                                                                                                                                                                                                                                                                                         |
| 45 |                                                           |     |                                                                                                                                                                                                                                                                                                                                                                                                         |
| 46 |                                                           |     |                                                                                                                                                                                                                                                                                                                                                                                                         |
| 47 |                                                           |     |                                                                                                                                                                                                                                                                                                                                                                                                         |
| 48 | Sample size                                               | 14  | Estimated number of participants needed to achieve study objectives and how it was determined, including clinical and statistical assumptions supporting any sample size calculations (Page 11, lines 346-348)                                                                                                                                                                                          |
| 49 |                                                           |     |                                                                                                                                                                                                                                                                                                                                                                                                         |
| 50 |                                                           |     |                                                                                                                                                                                                                                                                                                                                                                                                         |
| 51 |                                                           |     |                                                                                                                                                                                                                                                                                                                                                                                                         |
| 52 |                                                           |     |                                                                                                                                                                                                                                                                                                                                                                                                         |
| 53 |                                                           |     |                                                                                                                                                                                                                                                                                                                                                                                                         |
| 54 | Recruitment                                               | 15  | Strategies for achieving adequate participant enrolment to reach target sample size (Page 5, 140+)                                                                                                                                                                                                                                                                                                      |
| 55 |                                                           |     |                                                                                                                                                                                                                                                                                                                                                                                                         |
| 56 |                                                           |     |                                                                                                                                                                                                                                                                                                                                                                                                         |

### Methods: Assignment of interventions (for controlled trials)

Allocation:



1  
2 Sequence generation 16a Method of generating the allocation sequence (eg, computer-generated random numbers), and list of any factors for stratification. To reduce predictability of a random sequence, details of any planned restriction (eg, blocking) should be provided in a separate document that is unavailable to those who enrol participants or assign interventions (Page 5, 154-159)

10 Allocation concealment mechanism 16b Mechanism of implementing the allocation sequence (eg, central telephone; sequentially numbered, opaque, sealed envelopes), describing any steps to conceal the sequence until interventions are assigned (Page 5, 154-159)

16 Implementation 16c Who will generate the allocation sequence, who will enrol participants, and who will assign participants to interventions (Page 5, 158)

20 Blinding (masking) 17a Who will be blinded after assignment to interventions (eg, trial participants, care providers, outcome assessors, data analysts), and how N/A

25 17b If blinded, circumstances under which unblinding is permissible, and procedure for revealing a participant's allocated intervention during the trial N/A

### 29 **Methods: Data collection, management, and analysis**

31 Data collection methods 18a Plans for assessment and collection of outcome, baseline, and other trial data, including any related processes to promote data quality (eg, duplicate measurements, training of assessors) and a description of study instruments (eg, questionnaires, laboratory tests) along with their reliability and validity, if known. Reference to where data collection forms can be found, if not in the protocol (Page 7-11)

39 18b Plans to promote participant retention and complete follow-up, including list of any outcome data to be collected for participants who discontinue or deviate from intervention protocols (Page 11)

44 Data management 19 Plans for data entry, coding, security, and storage, including any related processes to promote data quality (eg, double data entry; range checks for data values). Reference to where details of data management procedures can be found, if not in the protocol (Page 11, lines 349-354)

52 Statistical methods 20a Statistical methods for analysing primary and secondary outcomes. Reference to where other details of the statistical analysis plan can be found, if not in the protocol (Page 11 and 12)

56 20b Methods for any additional analyses (eg, subgroup and adjusted analyses) N/A

1  
2 20c Definition of analysis population relating to protocol non-adherence  
3 (eg, as randomised analysis), and any statistical methods to handle  
4 missing data (eg, multiple imputation) (Page 12)  
5

6 **Methods: Monitoring**  
7

8 Data monitoring 21a Composition of data monitoring committee (DMC) or Data and Safety  
9 Monitoring Board (DCMB); summary of its role and reporting  
10 structure; statement of whether it is independent from the sponsor  
11 and competing interests; and reference to where further details about  
12 its charter can be found, if not in the protocol. Alternatively, an  
13 explanation of why a DMC is not needed  
14  
15

16  
17 A DSMB is indicated, from a practical perspective in the following  
18 circumstances:  
19

- 20  
21 1. If the trial is intended to provide definitive information about  
22 effectiveness and/or safety of a medical or bio-behavioral intervention  
23 2. If there are prior data to suggest that the intervention being studied has  
24 the potential to induce potentially unacceptable toxicity  
25 3. If the trial is evaluating mortality or another major endpoint, such that  
26 inferiority of one treatment arm has safety as well as effectiveness  
27 implications  
28 4. If it would ethically be important for the trial to stop early if the primary  
29 question addressed has been definitively answered, even if secondary  
30 questions or complete safety information were not yet fully addressed  
31

32 The ECSERT study does not meet any of these criteria as a pilot/feasibility  
33 study  
34

35 21b Description of any interim analyses and stopping guidelines,  
36 including who will have access to these interim results and make the  
37 final decision to terminate the trial N/A  
38

39  
40 Harms 22 Plans for collecting, assessing, reporting, and managing solicited and  
41 spontaneously reported adverse events and other unintended effects  
42 of trial interventions or trial conduct (Page 12, safety reporting)  
43

44 Auditing 23 Frequency and procedures for auditing trial conduct, if any, and  
45 whether the process will be independent from investigators and the  
46 sponsor N/A aside from usual sponsor audits  
47  
48

49 **Ethics and dissemination**  
50

51 Research ethics 24 Plans for seeking research ethics committee/institutional review  
52 approval board (REC/IRB) approval (Page 16, ethical issues)  
53

54 Protocol 25 Plans for communicating important protocol modifications (eg,  
55 amendments changes to eligibility criteria, outcomes, analyses) to relevant parties  
56 (eg, investigators, REC/IRBs, trial participants, trial registries,  
57 journals, regulators) (Page 16, ethical issues)  
58  
59  
60

|    |                   |     |                                                                           |
|----|-------------------|-----|---------------------------------------------------------------------------|
| 1  |                   |     |                                                                           |
| 2  | Consent or        | 26a | Who will obtain informed consent or assent from potential trial           |
| 3  | assent            |     | participants or authorised surrogates, and how (see Item 32) (page 5)     |
| 4  |                   |     |                                                                           |
| 5  |                   | 26b | Additional consent provisions for collection and use of participant       |
| 6  |                   |     | data and biological specimens in ancillary studies, if applicable         |
| 7  |                   |     | (consent form)                                                            |
| 8  |                   |     |                                                                           |
| 9  | Confidentiality   | 27  | How personal information about potential and enrolled participants        |
| 10 |                   |     | will be collected, shared, and maintained in order to protect             |
| 11 |                   |     | confidentiality before, during, and after the trial (Page 11)             |
| 12 |                   |     |                                                                           |
| 13 | Declaration of    | 28  | Financial and other competing interests for principal investigators for   |
| 14 | interests         |     | the overall trial and each study site (Page 16, line 515)                 |
| 15 |                   |     |                                                                           |
| 16 | Access to data    | 29  | Statement of who will have access to the final trial dataset, and         |
| 17 |                   |     | disclosure of contractual agreements that limit such access for           |
| 18 |                   |     | investigators (Page 17, availability of data)                             |
| 19 |                   |     |                                                                           |
| 20 |                   |     |                                                                           |
| 21 | Ancillary and     | 30  | Provisions, if any, for ancillary and post-trial care, and for            |
| 22 | post-trial care   |     | compensation to those who suffer harm from trial participation N/A        |
| 23 |                   |     |                                                                           |
| 24 | Dissemination     | 31a | Plans for investigators and sponsor to communicate trial results to       |
| 25 | policy            |     | participants, healthcare professionals, the public, and other relevant    |
| 26 |                   |     | groups (eg, via publication, reporting in results databases, or other     |
| 27 |                   |     | data sharing arrangements), including any publication restrictions        |
| 28 |                   |     | (Page 17, availability of data)                                           |
| 29 |                   |     |                                                                           |
| 30 |                   |     |                                                                           |
| 31 |                   |     |                                                                           |
| 32 |                   | 31b | Authorship eligibility guidelines and any intended use of professional    |
| 33 |                   |     | writers (Page 17, availability of data)                                   |
| 34 |                   |     |                                                                           |
| 35 |                   | 31c | Plans, if any, for granting public access to the full protocol,           |
| 36 |                   |     | participant-level dataset, and statistical code (Page 17, availability of |
| 37 |                   |     | data)                                                                     |
| 38 |                   |     |                                                                           |
| 39 |                   |     |                                                                           |
| 40 | <b>Appendices</b> |     |                                                                           |
| 41 |                   |     |                                                                           |
| 42 | Informed consent  | 32  | Model consent form and other related documentation given to               |
| 43 | materials         |     | participants and authorised surrogates Yes                                |
| 44 |                   |     |                                                                           |
| 45 | Biological        | 33  | Plans for collection, laboratory evaluation, and storage of biological    |
| 46 | specimens         |     | specimens for genetic or molecular analysis in the current trial and      |
| 47 |                   |     | for future use in ancillary studies, if applicable (Page 10)              |
| 48 |                   |     |                                                                           |

\*It is strongly recommended that this checklist be read in conjunction with the SPIRIT 2013 Explanation & Elaboration for important clarification on the items. Amendments to the protocol should be tracked and dated. The SPIRIT checklist is copyrighted by the SPIRIT Group under the Creative Commons "[Attribution-NonCommercial-NoDerivs 3.0 Unported](https://creativecommons.org/licenses/by-nc-nd/3.0/)" license.
