# Supplementary figures and images for: A pilot randomised controlled trial of a structured, home-based exercise programme on cardiovascular structure and function in kidney transplant recipients: the ECSERT study design and methods
Source: PubMed Central journal article supplement — BMJ Open. 2021 Oct 5;11(10):e046945. doi: 10.1136/bmjopen-2020-046945 (PMC8493915; doi:10.1136/bmjopen-2020-046945), 2021-10-05

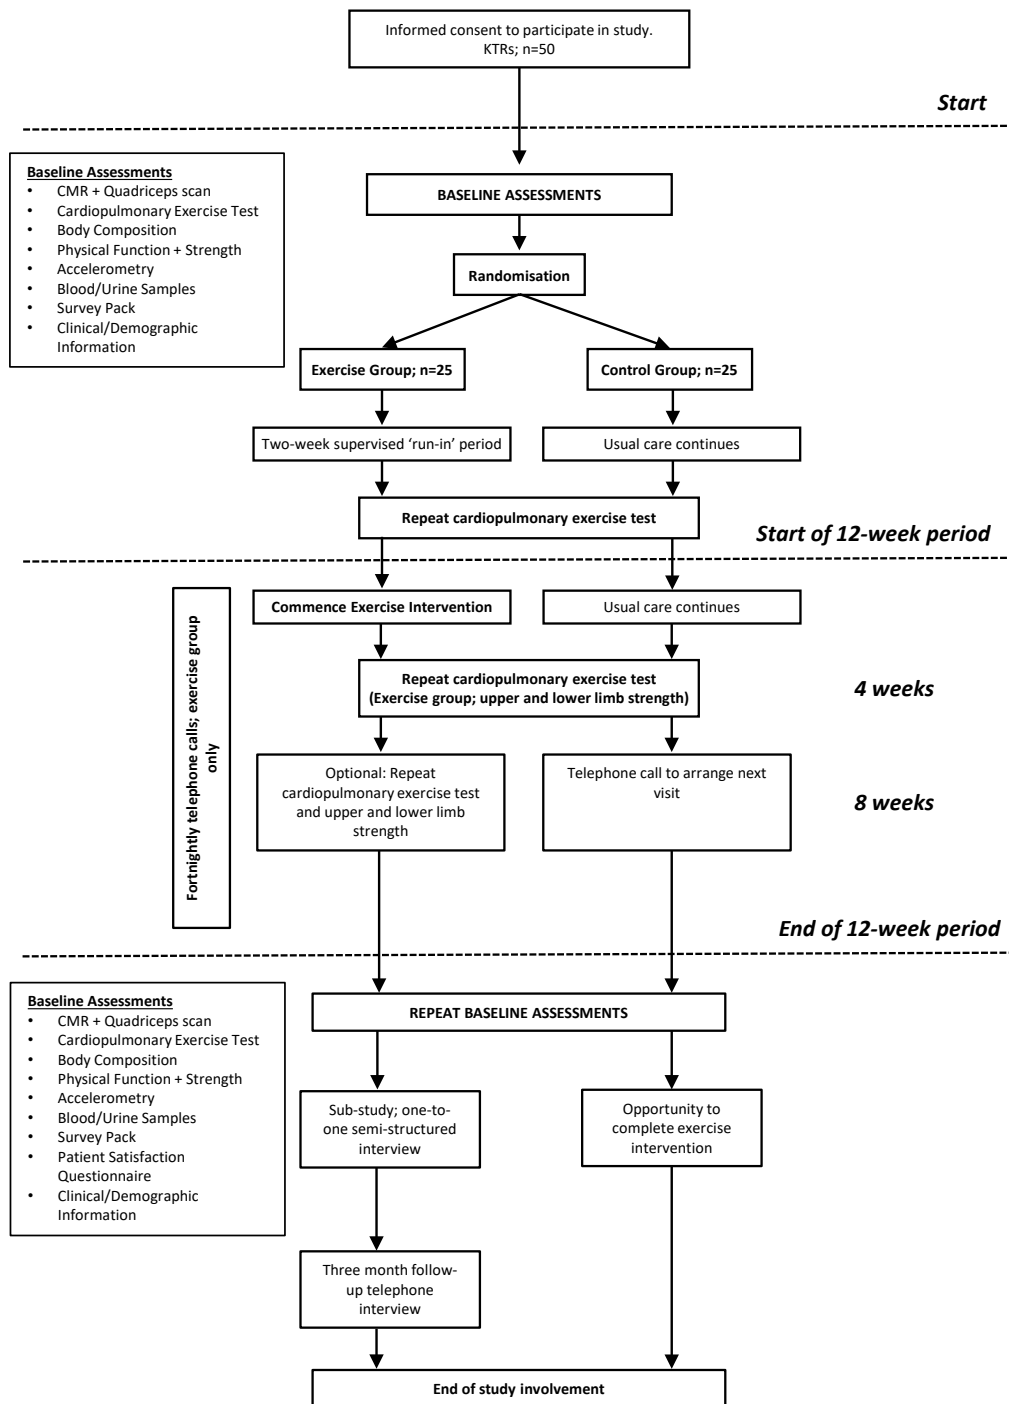

Figure X. Original ECSERT study flow diagram (pre-COVID-19)

Supplement: bmjopen-2020-046945supp001.pdf [file bmjopen-2020-046945supp001.pdf]
